# Supplementary material for: Effect of floods on the δ13C values in plant leaves: a study of willows in Northeastern Siberia
Source: PeerJ. 2018 Sep 20;6:e5374. doi: 10.7717/peerj.5374 (PMC6151259; doi:10.7717/peerj.5374)
Supplement: Supplemental Information 7 — ADC monitoring includes especially photosynthetic activity and stomatal conductance. [file peerj-06-5374-s007.csv]

Record	dt.former	tm	eref	^e	cref	^c	Qleaf	Tch	Tl	u	p	ci	E	gs	A	area	rb	Tl mtd	Q mode	Leaf No	gs/Leaf area	A/Leaf area	Tree No	Species	Site	Hydrological status	Monitored times
7	15-Jul-17	14:33:02	6.4	2	445	18	546	9.2	10.4	199.4	1020	364	3.83	1.34	36.21	424.9843472	0.35	calc.	climate	PA1-2	0.31530573	8.520313804	PA1	S. pulchra	SPh-PA	In water	1st
8	15-Jul-17	14:33:12	6.4	1.9	445	18	546	9.2	10.4	200.4	1020	361	3.73	1.27	36.32	424.9843472	0.35	calc.	climate	PA1-2	0.298834536	8.54619711	PA1	S. pulchra	SPh-PA	In water	1st
9	15-Jul-17	14:33:20	6.4	1.9	445	17	546	9.3	10.4	198.7	1020	365	3.71	1.25	34.21	424.9843472	0.35	calc.	climate	PA1-2	0.29412848	8.049708236	PA1	S. pulchra	SPh-PA	In water	1st
10	15-Jul-17	14:33:39	6.4	1.8	445	17	546	9.2	10.5	200.4	1020	361	3.51	1.11	33.33	424.9843472	0.35	calc.	climate	PA1-2	0.26118609	7.842641787	PA1	S. pulchra	SPh-PA	In water	1st
11	15-Jul-17	14:33:52	6.5	1.8	444	16	546	9.1	10.5	199.4	1020	364	3.53	1.13	32.35	424.9843472	0.35	calc.	climate	PA1-2	0.265892146	7.612045058	PA1	S. pulchra	SPh-PA	In water	1st
12	15-Jul-17	14:34:08	6.4	1.8	444	16	546	9.3	10.5	201	1020	364	3.52	1.12	32.1	424.9843472	0.35	calc.	climate	PA1-2	0.263539118	7.553219362	PA1	S. pulchra	SPh-PA	In water	1st
13	15-Jul-17	14:34:23	6.5	1.8	444	16	546	9.3	10.5	200	1020	366	3.58	1.15	31.98	424.9843472	0.35	calc.	climate	PA1-2	0.270598201	7.524983028	PA1	S. pulchra	SPh-PA	In water	1st
14	15-Jul-17	14:34:29	6.5	1.8	444	16	546	9.3	10.5	202	1020	363	3.45	1.08	31.74	424.9843472	0.35	calc.	climate	PA1-2	0.254127007	7.46851036	PA1	S. pulchra	SPh-PA	In water	1st
15	15-Jul-17	14:34:36	6.5	1.7	444	16	546	9.3	10.5	199	1020	361	3.36	1.02	31.68	424.9843472	0.35	calc.	climate	PA1-2	0.24000884	7.454392193	PA1	S. pulchra	SPh-PA	In water	1st
16	15-Jul-17	14:34:45	6.5	1.8	444	16	546	9.3	10.5	199.7	1020	364	3.44	1.09	31.34	424.9843472	0.35	calc.	climate	PA1-2	0.256480034	7.374389247	PA1	S. pulchra	SPh-PA	In water	1st
17	15-Jul-17	14:37:52	6.8	1.9	443	19	546	9.6	10.7	198.7	1020	354	3.63	1.24	38.26	557.0778836	0.35	calc.	climate	PA1-3	0.222590061	6.867980425	PA1	S. pulchra	SPh-PA	In water	1st
18	15-Jul-17	14:38:05	6.8	1.8	443	19	546	9.6	10.8	199.4	1020	352	3.55	1.16	37.38	557.0778836	0.35	calc.	climate	PA1-3	0.208229412	6.710013285	PA1	S. pulchra	SPh-PA	In water	1st
19	15-Jul-17	14:38:15	6.9	1.7	442	18	546	9.7	10.8	201	1020	349	3.33	1.07	36.46	557.0778836	0.35	calc.	climate	PA1-3	0.192073682	6.544865821	PA1	S. pulchra	SPh-PA	In water	1st
20	15-Jul-17	14:38:26	6.9	1.7	442	19	546	9.6	10.8	199.4	1020	347	3.41	1.09	37.75	557.0778836	0.35	calc.	climate	PA1-3	0.195663844	6.776431287	PA1	S. pulchra	SPh-PA	In water	1st
21	15-Jul-17	14:38:54	6.9	1.7	442	19	546	9.7	10.8	201	1020	346	3.25	1.04	37.17	557.0778836	0.35	calc.	climate	PA1-3	0.186688438	6.672316582	PA1	S. pulchra	SPh-PA	In water	1st
22	15-Jul-17	14:39:02	7	1.6	442	19	546	9.7	10.8	199.4	1020	344	3.19	0.99	36.77	557.0778836	0.35	calc.	climate	PA1-3	0.177713032	6.600513336	PA1	S. pulchra	SPh-PA	In water	1st
31	18-Jul-17	10:42:08	9.2	2.1	412	15	546	18.5	19.6	199	1005	265	4.23	0.42	29.63	593.024876	0.35	calc.	climate	PA1-2	0.070823336	4.996417722	PA1	S. pulchra	SPh-PA	In water	2nd
32	18-Jul-17	10:42:13	9.2	2.2	412	15	546	18.4	19.6	198.7	1005	267	4.42	0.44	30.29	593.024876	0.35	calc.	climate	PA1-2	0.074195876	5.107711536	PA1	S. pulchra	SPh-PA	In water	2nd
33	18-Jul-17	10:42:23	9.1	2.3	411	15	546	18.5	19.6	201.4	1005	271	4.52	0.45	29.83	593.024876	0.35	calc.	climate	PA1-2	0.075882146	5.03014312	PA1	S. pulchra	SPh-PA	In water	2nd
34	18-Jul-17	10:42:30	9.3	2.4	411	15	546	18.5	19.6	198.4	1005	273	4.7	0.48	30.81	593.024876	0.35	calc.	climate	PA1-2	0.080940955	5.19539757	PA1	S. pulchra	SPh-PA	In water	2nd
35	18-Jul-17	10:42:41	9.3	2.4	411	16	546	18.5	19.7	200.7	1005	273	4.69	0.48	30.73	593.024876	0.35	calc.	climate	PA1-2	0.080940955	5.181907411	PA1	S. pulchra	SPh-PA	In water	2nd
36	18-Jul-17	10:42:50	9.3	2.5	411	15	546	18.5	19.7	199	1005	281	4.96	0.52	30.77	593.024876	0.35	calc.	climate	PA1-2	0.087686035	5.188652491	PA1	S. pulchra	SPh-PA	In water	2nd
37	18-Jul-17	10:44:10	9.2	2.2	411	20	546	18.5	19.7	198.7	1005	226	4.41	0.44	38.96	557.0778836	0.35	calc.	climate	PA1-3	0.07898357	6.993636105	PA1	S. pulchra	SPh-PA	In water	2nd
38	18-Jul-17	10:44:25	9.3	2.5	411	20	546	18.5	19.7	198.4	1005	242	4.89	0.5	39.24	557.0778836	0.35	calc.	climate	PA1-3	0.089754057	7.043898377	PA1	S. pulchra	SPh-PA	In water	2nd
39	18-Jul-17	10:44:36	9.3	2.4	411	20	546	18.5	19.7	200	1005	239	4.75	0.49	39.15	557.0778836	0.35	calc.	climate	PA1-3	0.087958976	7.027742647	PA1	S. pulchra	SPh-PA	In water	2nd
40	18-Jul-17	10:44:42	9.3	2.5	411	20	546	18.6	19.7	199.4	1005	242	4.9	0.51	39.71	557.0778836	0.35	calc.	climate	PA1-3	0.091549138	7.12826719	PA1	S. pulchra	SPh-PA	In water	2nd
41	18-Jul-17	10:44:57	9.3	2.5	411	19	546	18.6	19.8	200.4	1005	247	4.99	0.52	38.83	557.0778836	0.35	calc.	climate	PA1-3	0.093344219	6.97030005	PA1	S. pulchra	SPh-PA	In water	2nd
42	18-Jul-17	10:45:05	9.3	2.5	411	19	546	18.6	19.8	198.7	1005	250	4.97	0.52	37.95	557.0778836	0.35	calc.	climate	PA1-3	0.093344219	6.81233291	PA1	S. pulchra	SPh-PA	In water	2nd
61	21-Jul-17	12:58:32	7.8	2	412	16	546	12.3	13.5	198.7	1014	325	4.01	0.98	32.2	593.024876	0.35	calc.	climate	PA1-2	0.16525445	5.429789087	PA1	S. pulchra	SPh-PA	In water	3rd
62	21-Jul-17	12:58:42	7.9	2.1	412	16	546	12.3	13.5	200.7	1014	328	4.06	1	31.4	593.024876	0.35	calc.	climate	PA1-2	0.16862699	5.294887495	PA1	S. pulchra	SPh-PA	In water	3rd
63	21-Jul-17	12:58:51	7.8	2.2	412	17	546	12.3	13.5	199.4	1014	325	4.31	1.1	34.59	593.024876	0.35	calc.	climate	PA1-2	0.185489689	5.832807594	PA1	S. pulchra	SPh-PA	In water	3rd
64	21-Jul-17	12:59:05	7.9	2.2	412	18	546	12.4	13.5	199	1014	324	4.31	1.1	34.88	593.024876	0.35	calc.	climate	PA1-2	0.185489689	5.881709421	PA1	S. pulchra	SPh-PA	In water	3rd
65	21-Jul-17	12:59:12	7.9	2.3	412	19	546	12.3	13.6	199.4	1014	319	4.4	1.13	37.41	593.024876	0.35	calc.	climate	PA1-2	0.190548499	6.308335706	PA1	S. pulchra	SPh-PA	In water	3rd
66	21-Jul-17	12:59:22	7.8	2.3	412	19	546	12.4	13.6	200	1014	320	4.43	1.16	37.66	593.024876	0.35	calc.	climate	PA1-2	0.195607309	6.350492454	PA1	S. pulchra	SPh-PA	In water	3rd
67	21-Jul-17	13:00:56	7.8	2.1	412	15	546	12.3	13.4	201	1014	332	4.08	0.98	29.49	557.0778836	0.35	calc.	climate	PA1-3	0.175917951	5.293694269	PA1	S. pulchra	SPh-PA	In water	3rd
68	21-Jul-17	13:01:06	7.8	2.1	412	17	546	12.2	13.5	199	1014	317	4.03	0.96	34.71	557.0778836	0.35	calc.	climate	PA1-3	0.172327789	6.230726622	PA1	S. pulchra	SPh-PA	In water	3rd
69	21-Jul-17	13:01:16	7.7	2.1	412	17	546	12.3	13.4	200.7	1014	320	4.09	1	34.53	557.0778836	0.35	calc.	climate	PA1-3	0.179508114	6.198415162	PA1	S. pulchra	SPh-PA	In water	3rd
70	21-Jul-17	13:01:23	7.8	2.1	412	19	546	12.3	13.4	199.4	1014	310	4.14	1.02	38.76	557.0778836	0.35	calc.	climate	PA1-3	0.183098276	6.957734482	PA1	S. pulchra	SPh-PA	In water	3rd
71	21-Jul-17	13:01:33	7.7	2.2	412	19	546	12.3	13.4	200.7	1014	315	4.25	1.08	38.29	557.0778836	0.35	calc.	climate	PA1-3	0.193868763	6.873365669	PA1	S. pulchra	SPh-PA	In water	3rd
72	21-Jul-17	13:01:43	7.7	2.2	412	20	546	12.3	13.4	198.7	1014	311	4.39	1.11	40.29	557.0778836	0.35	calc.	climate	PA1-3	0.199254006	7.232381896	PA1	S. pulchra	SPh-PA	In water	3rd
74	21-Jul-17	13:03:37	7.7	1.9	412	13	546	12.2	13.3	198.7	1014	335	3.78	0.88	26.45	578.1550967	0.35	calc.	climate	PA1-4	0.152208292	4.57489697	PA1	S. pulchra	SPh-PA	In water	3rd
75	21-Jul-17	13:03:47	7.7	2	412	13	546	12.2	13.3	200.7	1014	339	3.94	0.95	26.21	578.1550967	0.35	calc.	climate	PA1-4	0.16431577	4.533385617	PA1	S. pulchra	SPh-PA	In water	3rd
76	21-Jul-17	13:03:56	7.7	2.2	412	16	546	12.1	13.3	199	1014	334	4.31	1.1	30.97	578.1550967	0.35	calc.	climate	PA1-4	0.190260365	5.356694108	PA1	S. pulchra	SPh-PA	In water	3rd
77	21-Jul-17	13:04:05	7.7	2.2	412	15	546	12.2	13.3	198.7	1014	333	4.24	1.08	30.76	578.1550967	0.35	calc.	climate	PA1-4	0.186801086	5.320371675	PA1	S. pulchra	SPh-PA	In water	3rd
78	21-Jul-17	13:04:14	7.7	2.2	412	17	546	12.1	13.3	199	1014	327	4.4	1.13	34.34	578.1550967	0.35	calc.	climate	PA1-4	0.195449285	5.939582682	PA1	S. pulchra	SPh-PA	In water	3rd
79	21-Jul-17	13:04:24	7.7	2.3	413	18	546	12.1	13.3	199.4	1014	327	4.43	1.16	35.09	578.1550967	0.35	calc.	climate	PA1-4	0.200638204	6.069305659	PA1	S. pulchra	SPh-PA	In water	3rd
80	21-Jul-17	13:04:34	7.6	2.3	413	19	546	12.1	13.3	199	1014	326	4.59	1.27	37.34	578.1550967	0.35	calc.	climate	PA1-4	0.21966424	6.458474588	PA1	S. pulchra	SPh-PA	In water	3rd
81	21-Jul-17	13:04:43	7.7	2.4	413	19	546	12.2	13.3	199.4	1014	326	4.68	1.27	37.16	578.1550967	0.35	calc.	climate	PA1-4	0.21966424	6.427341074	PA1	S. pulchra	SPh-PA	In water	3rd
82	21-Jul-17	13:04:53	7.6	2.4	413	20	546	12.1	13.3	199.4	1014	324	4.82	1.34	39.28	578.1550967	0.35	calc.	climate	PA1-4	0.231771718	6.794024687	PA1	S. pulchra	SPh-PA	In water	3rd
106	25-Jul-17	11:16:13	14.6	1.3	389	18	546	18.9	20.1	198.7	1010	205	2.62	0.4	36.24	593.024876	0.35	calc.	climate	PA1-2	0.067450796	6.111042128	PA1	S. pulchra	SPh-PA	Wet	4th
107	25-Jul-17	11:16:23	14.6	1.5	389	18	546	18.8	20	199.4	1010	224	2.95	0.47	36.79	593.024876	0.35	calc.	climate	PA1-2	0.079254685	6.203786972	PA1	S. pulchra	SPh-PA	Wet	4th
108	25-Jul-17	11:16:32	14.5	1.6	389	19	546	18.9	20	198.7	1010	235	3.18	0.52	36.9	593.024876	0.35	calc.	climate	PA1-2	0.087686035	6.222335941	PA1	S. pulchra	SPh-PA	Wet	4th
109	25-Jul-17	11:16:42	14.6	1.7	389	19	546	18.9	20	198.7	1010	244	3.42	0.57	37.65	593.024876	0.35	calc.	climate	PA1-2	0.096117384	6.348806184	PA1	S. pulchra	SPh-PA	Wet	4th
110	25-Jul-17	11:16:51	14.6	1.7	389	20	546	18.9	20	199.4	1010	237	3.35	0.56	38.89	593.024876	0.35	calc.	climate	PA1-2	0.094431115	6.557903652	PA1	S. pulchra	SPh-PA	Wet	4th
111	25-Jul-17	11:17:05	14.5	1.7	389	19	546	18.9	20	200.7	1010	241	3.36	0.57	37.96	593.024876	0.35	calc.	climate	PA1-2	0.096117384	6.401080551	PA1	S. pulchra	SPh-PA	Wet	4th
112	25-Jul-17	11:22:24	15.2	1.5	389	18	546	19.6	20.8	199	1010	209	2.89	0.42	36.68	557.0778836	0.35	calc.	climate	PA1-3	0.075393408	6.584357606	PA1	S. pulchra	SPh-PA	Wet	4th
113	25-Jul-17	11:22:34	15.2	1.6	389	20	546	19.7	20.8	198.7	1010	209	3.14	0.46	39.55	557.0778836	0.35	calc.	climate	PA1-3	0.082573732	7.099545892	PA1	S. pulchra	SPh-PA	Wet	4th
114	25-Jul-17	11:22:51	15.2	2.2	389	22	546	19.8	20.9	200.7	1010	248	4.32	0.73	43.31	557.0778836	0.35	calc.	climate	PA1-3	0.131040923	7.774496399	PA1	S. pulchra	SPh-PA	Wet	4th
115	25-Jul-17	11:22:55	15.4	2.2	389	22	546	19.8	20.9	198.7	1010	248	4.32	0.73	43.31	557.0778836	0.35	calc.	climate	PA1-3	0.131040923	7.774496399	PA1	S. pulchra	SPh-PA	Wet	4th
116	25-Jul-17	11:23:03	15.4	2.3	389	22	546	19.8	21	200.7	1010	259	4.57	0.82	42.74	557.0778836	0.35	calc.	climate	PA1-3	0.147196653	7.672176774	PA1	S. pulchra	SPh-PA	Wet	4th
117	25-Jul-17	11:23:12	15.5	2.6	389	22	546	19.9	21	199.4	1010	273	5.22	1.02	43.93	557.0778836	0.35	calc.	climate	PA1-3	0.183098276	7.885791429	PA1	S. pulchra	SPh-PA	Wet	4th
118	25-Jul-17	11:26:42	16.7	0.9	386	19	546	19.8	20.9	199	1010	126	1.79	0.27	37.29	578.1550967	0.35	calc.	climate	PA1-4	0.046700272	6.44982639	PA1	S. pulchra	SPh-PA	Wet	4th
119	25-Jul-17	11:26:53	16.8	1	386	18	546	19.8	21	200.4	1010	142	1.88	0.28	36.47	578.1550967	0.35	calc.	climate	PA1-4	0.048429911	6.307995935	PA1	S. pulchra	SPh-PA	Wet	4th
120	25-Jul-17	11:27:03	16.8	1	386	20	546	19.8	20.9	199.4	1010	135	1.9	0.3	39.42	578.1550967	0.35	calc.	climate	PA1-4	0.051889191	6.818239643	PA1	S. pulchra	SPh-PA	Wet	4th
121	25-Jul-17	11:27:11	16.9	0.9	385	19	546	19.8	20.9	200.4	1010	136	1.84	0.3	38.68	578.1550967	0.35	calc.	climate	PA1-4	0.051889191	6.690246306	PA1	S. pulchra	SPh-PA	Wet	4th
122	25-Jul-17	11:27:19	17.1	1	385	21	546	19.8	20.9	198.7	1010	130	1.91	0.31	40.78	578.1550967	0.35	calc.	climate	PA1-4	0.05361883	7.05347064	PA1	S. pulchra	SPh-PA	Wet	4th
123	25-Jul-17	11:27:30	17.1	1	385	20	546	19.8	20.9	199.7	1010	143	1.94	0.32	40.45	578.1550967	0.35	calc.	climate	PA1-4	0.05534847	6.99639253	PA1	S. pulchra	SPh-PA	Wet	4th
124	27-Jul-17	12:39:55	12.8	5	379	13	546	23.4	24.5	201	1000	307	9.89	1.01	25.65	593.024876	0.35	calc.	climate	PA1-2	0.17031326	4.325282301	PA1	S. pulchra	SPh-PA	Wet	5th
125	27-Jul-17	12:40:03	12.7	5.2	379	17	546	23.4	24.5	199	1000	293	10.28	1.11	33.02	593.024876	0.35	calc.	climate	PA1-2	0.187175959	5.568063219	PA1	S. pulchra	SPh-PA	Wet	5th
126	27-Jul-17	12:40:17	12.8	5.4	379	16	546	23.4	24.6	199	1000	296	10.8	1.19	32.69	593.024876	0.35	calc.	climate	PA1-2	0.200666118	5.512416312	PA1	S. pulchra	SPh-PA	Wet	5th
127	27-Jul-17	12:40:24	12.7	5.6	379	19	546	23.5	24.6	198.7	1000	291	11.2	1.31	37.16	593.024876	0.35	calc.	climate	PA1-2	0.220901357	6.266178959	PA1	S. pulchra	SPh-PA	Wet	5th
128	27-Jul-17	12:40:33	12.9	5.9	379	19	546	23.5	24.7	200	1000	294	11.75	1.4	37.19	593.024876	0.35	calc.	climate	PA1-2	0.236077786	6.271237768	PA1	S. pulchra	SPh-PA	Wet	5th
129	27-Jul-17	12:40:41	12.8	5.9	379	20	546	23.5	24.7	198	1000	288	11.85	1.45	40.72	593.024876	0.35	calc.	climate	PA1-2	0.244509136	6.866491044	PA1	S. pulchra	SPh-PA	Wet	5th
130	27-Jul-17	12:40:48	12.9	5.9	379	20	546	23.5	24.7	199	1000	288	11.85	1.45	40.72	593.024876	0.35	calc.	climate	PA1-2	0.244509136	6.866491044	PA1	S. pulchra	SPh-PA	Wet	5th
131	27-Jul-17	12:40:53	12.8	6	379	20	546	23.6	24.7	200.4	1000	291	12.07	1.51	39.98	593.024876	0.35	calc.	climate	PA1-2	0.254626755	6.741707071	PA1	S. pulchra	SPh-PA	Wet	5th
132	27-Jul-17	12:41:00	13	6.2	379	22	546	23.6	24.7	198.4	1000	286	12.34	1.55	43.16	593.024876	0.35	calc.	climate	PA1-2	0.261371835	7.2779409	PA1	S. pulchra	SPh-PA	Wet	5th
133	27-Jul-17	12:42:36	12.7	5.6	378	22	546	23.5	24.7	199	1000	272	11.07	1.22	43.77	557.0778836	0.35	calc.	climate	PA1-3	0.218999899	7.857070131	PA1	S. pulchra	SPh-PA	Wet	5th
134	27-Jul-17	12:42:48	12.6	5.6	379	22	546	23.5	24.6	200.7	1000	273	11.23	1.27	44.25	557.0778836	0.35	calc.	climate	PA1-3	0.227975304	7.943234026	PA1	S. pulchra	SPh-PA	Wet	5th
135	27-Jul-17	12:42:56	12.6	5.9	379	24	546	23.5	24.6	198.7	1000	269	11.76	1.41	48.79	557.0778836	0.35	calc.	climate	PA1-3	0.25310644	8.758200861	PA1	S. pulchra	SPh-PA	Wet	5th
136	27-Jul-17	12:43:05	12.4	6	378	24	546	23.4	24.6	200.7	1000	273	12.02	1.47	48.3	557.0778836	0.35	calc.	climate	PA1-3	0.263876927	8.670241886	PA1	S. pulchra	SPh-PA	Wet	5th
137	27-Jul-17	12:43:14	12.5	6.1	378	26	546	23.4	24.6	199	1000	267	12.12	1.48	51.03	557.0778836	0.35	calc.	climate	PA1-3	0.265672008	9.160299036	PA1	S. pulchra	SPh-PA	Wet	5th
138	27-Jul-17	12:43:24	12.4	6.4	378	25	546	23.3	24.5	199	1000	275	12.68	1.69	50.7	557.0778836	0.35	calc.	climate	PA1-3	0.303368712	9.101061358	PA1	S. pulchra	SPh-PA	Wet	5th
139	27-Jul-17	12:43:33	12.4	6.4	378	27	546	23.4	24.6	199	1000	269	12.65	1.65	52.86	557.0778836	0.35	calc.	climate	PA1-3	0.296188387	9.488798884	PA1	S. pulchra	SPh-PA	Wet	5th
140	27-Jul-17	12:43:43	12.6	6.4	378	27	546	23.4	24.6	199.4	1000	269	12.7	1.66	53.31	557.0778836	0.35	calc.	climate	PA1-3	0.297983469	9.569577535	PA1	S. pulchra	SPh-PA	Wet	5th
141	27-Jul-17	12:45:18	12.4	5.6	378	22	546	23.4	24.5	201.4	1000	273	11.08	1.23	43.58	578.1550967	0.35	calc.	climate	PA1-4	0.212745681	7.537769752	PA1	S. pulchra	SPh-PA	Wet	5th
142	27-Jul-17	12:45:29	12.6	5.5	378	24	546	23.4	24.5	199.4	1000	263	10.98	1.24	48.02	578.1550967	0.35	calc.	climate	PA1-4	0.214475321	8.305729773	PA1	S. pulchra	SPh-PA	Wet	5th
143	27-Jul-17	12:45:37	12.6	5.8	379	24	546	23.4	24.5	200.4	1000	267	11.57	1.33	48.41	578.1550967	0.35	calc.	climate	PA1-4	0.230042078	8.373185721	PA1	S. pulchra	SPh-PA	Wet	5th
144	27-Jul-17	12:45:47	12.5	5.7	379	26	546	23.4	24.5	198.7	1000	259	11.44	1.33	52.06	578.1550967	0.35	calc.	climate	PA1-4	0.230042078	9.004504206	PA1	S. pulchra	SPh-PA	Wet	5th
145	27-Jul-17	12:45:59	12.6	6	378	26	546	23.4	24.6	200.4	1000	264	11.92	1.44	52.03	578.1550967	0.35	calc.	climate	PA1-4	0.249068115	8.999315287	PA1	S. pulchra	SPh-PA	Wet	5th
146	27-Jul-17	12:46:05	12.6	6.1	378	27	546	23.4	24.6	199	1000	261	12.13	1.49	54.3	578.1550967	0.35	calc.	climate	PA1-4	0.257716313	9.391943496	PA1	S. pulchra	SPh-PA	Wet	5th
1	15-Jul-17	14:43:19	7.3	1.8	440	26	546	10	11.2	198.7	1020	316	3.44	1.15	51.11	888.6541595	0.35	calc.	climate	PA2-1	0.129409173	5.751393774	PA2	S. richardsonii	SPh-PA	In water	1st
2	15-Jul-17	14:43:28	7.3	1.8	440	28	546	10.1	11.2	199	1020	312	3.54	1.25	55.43	888.6541595	0.35	calc.	climate	PA2-1	0.140662145	6.237522146	PA2	S. richardsonii	SPh-PA	In water	1st
3	15-Jul-17	14:43:40	7.4	1.8	439	28	546	10.1	11.2	200.7	1020	312	3.55	1.24	55.23	888.6541595	0.35	calc.	climate	PA2-1	0.139536848	6.215016203	PA2	S. richardsonii	SPh-PA	In water	1st
4	15-Jul-17	14:43:58	7.3	1.7	439	29	546	10.1	11.1	200.7	1020	307	3.42	1.24	57.17	888.6541595	0.35	calc.	climate	PA2-1	0.139536848	6.433323851	PA2	S. richardsonii	SPh-PA	In water	1st
5	15-Jul-17	14:44:08	7.4	1.8	439	30	546	10.1	11.2	199	1020	298	3.44	1.18	59.38	888.6541595	0.35	calc.	climate	PA2-1	0.132785065	6.682014523	PA2	S. richardsonii	SPh-PA	In water	1st
6	15-Jul-17	14:44:17	7.5	1.9	439	30	546	10.1	11.2	201.4	1020	308	3.65	1.38	60.14	888.6541595	0.35	calc.	climate	PA2-1	0.155291008	6.767537107	PA2	S. richardsonii	SPh-PA	In water	1st
7	15-Jul-17	14:44:26	7.5	1.9	439	31	546	10	11.2	199.4	1020	307	3.74	1.41	61.76	888.6541595	0.35	calc.	climate	PA2-1	0.158666899	6.949835247	PA2	S. richardsonii	SPh-PA	In water	1st
8	15-Jul-17	14:44:45	7.5	1.8	439	31	546	10.1	11.2	199.7	1020	302	3.57	1.34	62.29	888.6541595	0.35	calc.	climate	PA2-1	0.150789819	7.009475996	PA2	S. richardsonii	SPh-PA	In water	1st
9	15-Jul-17	14:45:00	7.5	1.8	439	31	546	10.1	11.2	199	1020	302	3.55	1.33	61.53	888.6541595	0.35	calc.	climate	PA2-1	0.149664522	6.923953412	PA2	S. richardsonii	SPh-PA	In water	1st
10	15-Jul-17	14:45:14	7.5	1.9	439	31	546	10.1	11.2	199.4	1020	307	3.67	1.45	62.13	888.6541595	0.35	calc.	climate	PA2-1	0.163168088	6.991471242	PA2	S. richardsonii	SPh-PA	In water	1st
11	15-Jul-17	14:47:30	7.6	1.6	438	22	546	9.9	11.1	200.7	1020	322	3.05	1.01	44.41	760.8853097	0.35	calc.	climate	PA2-2	0.13274011	5.836622081	PA2	S. richardsonii	SPh-PA	In water	1st
12	15-Jul-17	14:47:38	7.5	1.7	438	24	546	9.9	11.1	199.4	1020	319	3.23	1.12	48.61	760.8853097	0.35	calc.	climate	PA2-2	0.147196954	6.388610659	PA2	S. richardsonii	SPh-PA	In water	1st
13	15-Jul-17	14:47:46	7.5	1.7	438	24	546	9.9	11.1	200.7	1020	324	3.32	1.2	48.38	760.8853097	0.35	calc.	climate	PA2-2	0.157711022	6.358382713	PA2	S. richardsonii	SPh-PA	In water	1st
14	15-Jul-17	14:47:57	7.5	1.8	438	26	546	9.9	11.1	199.4	1020	321	3.49	1.3	52.09	760.8853097	0.35	calc.	climate	PA2-2	0.170853607	6.845972624	PA2	S. richardsonii	SPh-PA	In water	1st
15	15-Jul-17	14:48:02	7.5	1.8	438	26	546	9.9	11.1	198.7	1020	321	3.49	1.3	52.09	760.8853097	0.35	calc.	climate	PA2-2	0.170853607	6.845972624	PA2	S. richardsonii	SPh-PA	In water	1st
16	15-Jul-17	14:48:14	7.5	1.8	438	27	546	9.9	11.1	199.4	1020	321	3.56	1.39	53.83	760.8853097	0.35	calc.	climate	PA2-2	0.182681934	7.074653606	PA2	S. richardsonii	SPh-PA	In water	1st
17	15-Jul-17	14:48:26	7.6	1.8	438	27	546	9.9	11.2	200.4	1020	319	3.56	1.36	54.06	760.8853097	0.35	calc.	climate	PA2-2	0.178739159	7.104881552	PA2	S. richardsonii	SPh-PA	In water	1st
18	15-Jul-17	14:48:34	7.5	1.9	438	28	546	10	11.1	199.7	1020	322	3.7	1.55	56.55	760.8853097	0.35	calc.	climate	PA2-2	0.20371007	7.432131923	PA2	S. richardsonii	SPh-PA	In water	1st
19	15-Jul-17	14:48:45	7.5	1.9	438	28	546	9.9	11.1	200.4	1020	322	3.73	1.54	56.24	760.8853097	0.35	calc.	climate	PA2-2	0.202395812	7.391389909	PA2	S. richardsonii	SPh-PA	In water	1st
20	15-Jul-17	14:48:52	7.5	1.9	438	29	546	9.9	11.1	199	1020	319	3.77	1.55	57.84	760.8853097	0.35	calc.	climate	PA2-2	0.20371007	7.601671272	PA2	S. richardsonii	SPh-PA	In water	1st
21	15-Jul-17	14:50:48	7.5	1.7	438	29	546	9.8	10.9	200	1020	305	3.32	1.25	57.83	1154.00255	0.35	calc.	climate	PA2-3	0.108318651	5.011254091	PA2	S. richardsonii	SPh-PA	In water	1st
22	15-Jul-17	14:50:58	7.5	1.8	437	29	546	9.7	10.9	200.7	1020	317	3.55	1.46	56.68	1154.00255	0.35	calc.	climate	PA2-3	0.126516185	4.911600932	PA2	S. richardsonii	SPh-PA	In water	1st
23	15-Jul-17	14:51:06	7.5	1.8	437	31	546	9.7	10.9	198.7	1020	307	3.56	1.46	61.73	1154.00255	0.35	calc.	climate	PA2-3	0.126516185	5.349208284	PA2	S. richardsonii	SPh-PA	In water	1st
24	15-Jul-17	14:51:16	7.5	1.9	437	31	546	9.7	10.9	200.7	1020	311	3.69	1.54	61.65	1154.00255	0.35	calc.	climate	PA2-3	0.133448579	5.34227589	PA2	S. richardsonii	SPh-PA	In water	1st
25	15-Jul-17	14:51:35	7.5	1.9	437	33	546	9.8	10.9	200.7	1020	307	3.77	1.66	66.03	1154.00255	0.35	calc.	climate	PA2-3	0.143847169	5.721824445	PA2	S. richardsonii	SPh-PA	In water	1st
26	15-Jul-17	14:51:44	7.5	2	437	34	546	9.8	10.9	199.7	1020	308	3.95	1.83	68.4	1154.00255	0.35	calc.	climate	PA2-3	0.158578506	5.927196608	PA2	S. richardsonii	SPh-PA	In water	1st
27	15-Jul-17	14:51:55	7.5	2.1	437	34	546	9.8	10.9	201	1020	311	4.03	1.94	68.78	1154.00255	0.35	calc.	climate	PA2-3	0.168110547	5.960125478	PA2	S. richardsonii	SPh-PA	In water	1st
28	15-Jul-17	14:52:04	7.5	2	437	36	546	9.8	10.9	199.4	1020	305	3.94	1.85	70.73	1154.00255	0.35	calc.	climate	PA2-3	0.160311604	6.129102574	PA2	S. richardsonii	SPh-PA	In water	1st
29	15-Jul-17	14:52:13	7.5	2.1	437	36	546	9.8	10.9	200.4	1020	308	4.04	1.99	71.24	1154.00255	0.35	calc.	climate	PA2-3	0.172443293	6.173296584	PA2	S. richardsonii	SPh-PA	In water	1st
30	15-Jul-17	14:52:23	7.5	2.1	437	36	546	9.8	10.9	200	1020	305	4.07	1.96	72.46	1154.00255	0.35	calc.	climate	PA2-3	0.169843645	6.279015588	PA2	S. richardsonii	SPh-PA	In water	1st
31	18-Jul-17	10:13:20	10.6	2.7	420	26	546	18.3	19.4	199.7	1005	255	5.41	0.74	50.73	888.6541595	0.35	calc.	climate	PA2-1	0.08327199	5.708632482	PA2	S. richardsonii	SPh-PA	In water	2nd
32	18-Jul-17	10:13:29	10.9	2.8	420	26	546	18.3	19.4	200	1005	260	5.57	0.77	50.81	888.6541595	0.35	calc.	climate	PA2-1	0.086647881	5.717634859	PA2	S. richardsonii	SPh-PA	In water	2nd
33	18-Jul-17	10:13:39	10.6	2.5	420	27	546	18.3	19.5	199.7	1005	234	4.99	0.67	53.65	888.6541595	0.35	calc.	climate	PA2-1	0.07539491	6.037219252	PA2	S. richardsonii	SPh-PA	In water	2nd
34	18-Jul-17	10:13:48	10.6	3.1	419	27	546	18.4	19.5	201	1005	267	6.15	0.88	52.97	888.6541595	0.35	calc.	climate	PA2-1	0.09902615	5.960699045	PA2	S. richardsonii	SPh-PA	In water	2nd
35	18-Jul-17	10:13:58	10.5	3.2	419	28	546	18.4	19.5	199.7	1005	262	6.21	0.9	55.19	888.6541595	0.35	calc.	climate	PA2-1	0.101276744	6.210515014	PA2	S. richardsonii	SPh-PA	In water	2nd
36	18-Jul-17	10:14:08	10.2	3.2	419	28	546	18.4	19.6	201.4	1005	265	6.4	0.93	55.56	888.6541595	0.35	calc.	climate	PA2-1	0.104652636	6.252151009	PA2	S. richardsonii	SPh-PA	In water	2nd
37	18-Jul-17	10:16:03	10.2	3.2	419	26	546	18.6	19.8	201	1005	259	6.3	0.8	51.77	760.8853097	0.35	calc.	climate	PA2-2	0.105140681	6.803916351	PA2	S. richardsonii	SPh-PA	In water	2nd
38	18-Jul-17	10:16:11	10.7	2.9	419	27	546	18.7	19.8	199.4	1005	241	5.7	0.7	53.28	760.8853097	0.35	calc.	climate	PA2-2	0.091998096	7.002369387	PA2	S. richardsonii	SPh-PA	In water	2nd
39	18-Jul-17	10:16:21	10.2	2.7	418	26	546	18.7	19.8	200	1005	236	5.31	0.66	51.96	760.8853097	0.35	calc.	climate	PA2-2	0.086741062	6.828887263	PA2	S. richardsonii	SPh-PA	In water	2nd
40	18-Jul-17	10:16:30	10.2	3.2	418	29	546	18.7	19.9	199	1005	245	6.27	0.81	57.1	760.8853097	0.35	calc.	climate	PA2-2	0.10645494	7.504416142	PA2	S. richardsonii	SPh-PA	In water	2nd
41	18-Jul-17	10:16:39	10.2	3.3	418	29	546	18.8	19.9	201	1005	251	6.46	0.85	56.63	760.8853097	0.35	calc.	climate	PA2-2	0.111711974	7.442645991	PA2	S. richardsonii	SPh-PA	In water	2nd
42	18-Jul-17	10:16:50	10.2	3.4	418	30	546	18.9	20	198.7	1005	250	6.75	0.91	59.38	760.8853097	0.35	calc.	climate	PA2-2	0.119597525	7.804067084	PA2	S. richardsonii	SPh-PA	In water	2nd
43	18-Jul-17	10:18:27	10.1	3.1	417	25	546	19	20.1	199	1005	255	6.07	0.72	49.16	1154.00255	0.35	calc.	climate	PA2-3	0.062391543	4.259955925	PA2	S. richardsonii	SPh-PA	In water	2nd
44	18-Jul-17	10:18:34	10	3.4	417	24	546	19	20.1	200.4	1005	275	6.68	0.85	47.83	1154.00255	0.35	calc.	climate	PA2-3	0.073656683	4.14470488	PA2	S. richardsonii	SPh-PA	In water	2nd
45	18-Jul-17	10:18:43	10	3.5	417	26	546	18.9	20.1	199	1005	271	7.04	0.94	52.54	1154.00255	0.35	calc.	climate	PA2-3	0.081455626	4.552849558	PA2	S. richardsonii	SPh-PA	In water	2nd
46	18-Jul-17	10:18:53	10.1	3.7	417	27	546	19	20.1	200.4	1005	273	7.27	0.98	53.06	1154.00255	0.35	calc.	climate	PA2-3	0.084921823	4.597910117	PA2	S. richardsonii	SPh-PA	In water	2nd
47	18-Jul-17	10:19:07	10.1	3.8	417	28	546	19	20.2	199.4	1005	271	7.45	1.02	55.04	1154.00255	0.35	calc.	climate	PA2-3	0.08838802	4.769486861	PA2	S. richardsonii	SPh-PA	In water	2nd
48	18-Jul-17	10:19:21	9.8	4	417	29	546	19	20.1	199	1005	275	7.97	1.17	58.29	1154.00255	0.35	calc.	climate	PA2-3	0.101386258	5.051115355	PA2	S. richardsonii	SPh-PA	In water	2nd
49	21-Jul-17	12:36:50	7.8	2.9	411	14	546	12.4	13.6	200.7	1014	358	5.6	1.9	27.38	888.6541595	0.35	calc.	climate	PA2-1	0.21380646	3.081063618	PA2	S. richardsonii	SPh-PA	In water	3rd
50	21-Jul-17	12:36:56	7.7	3	411	16	546	12.4	13.6	199.4	1014	353	5.83	2.08	31.64	888.6541595	0.35	calc.	climate	PA2-1	0.234061809	3.560440207	PA2	S. richardsonii	SPh-PA	In water	3rd
51	21-Jul-17	12:37:07	7.8	3.1	411	16	546	12.4	13.7	198.4	1014	355	6.01	2.19	31.29	888.6541595	0.35	calc.	climate	PA2-1	0.246440078	3.521054807	PA2	S. richardsonii	SPh-PA	In water	3rd
52	21-Jul-17	12:37:16	7.8	3.1	411	17	546	12.5	13.7	198.7	1014	352	6.15	2.34	33.91	888.6541595	0.35	calc.	climate	PA2-1	0.263319535	3.815882662	PA2	S. richardsonii	SPh-PA	In water	3rd
53	21-Jul-17	12:37:26	7.7	3.1	411	17	546	12.5	13.7	200.4	1014	352	6.16	2.37	34.43	888.6541595	0.35	calc.	climate	PA2-1	0.266695426	3.874398114	PA2	S. richardsonii	SPh-PA	In water	3rd
54	21-Jul-17	12:37:35	7.7	3.1	411	18	546	12.4	13.7	200	1014	350	6.08	2.34	35.15	888.6541595	0.35	calc.	climate	PA2-1	0.263319535	3.95541951	PA2	S. richardsonii	SPh-PA	In water	3rd
55	21-Jul-17	12:39:23	7.9	2.9	411	22	546	12.6	13.7	201	1014	328	5.62	1.83	43.38	760.8853097	0.35	calc.	climate	PA2-2	0.240509309	5.701253454	PA2	S. richardsonii	SPh-PA	In water	3rd
56	21-Jul-17	12:39:42	7.9	2.8	411	24	546	12.6	13.8	200.7	1014	319	5.49	1.82	48.32	760.8853097	0.35	calc.	climate	PA2-2	0.23919505	6.350497162	PA2	S. richardsonii	SPh-PA	In water	3rd
57	21-Jul-17	12:39:53	7.8	3.1	411	26	546	12.6	13.8	198.7	1014	319	5.97	2.16	51.89	760.8853097	0.35	calc.	climate	PA2-2	0.28387984	6.819687453	PA2	S. richardsonii	SPh-PA	In water	3rd
58	21-Jul-17	12:40:07	8.1	3	412	28	546	12.6	13.8	199	1014	314	5.97	2.12	54.75	760.8853097	0.35	calc.	climate	PA2-2	0.278622806	7.19556539	PA2	S. richardsonii	SPh-PA	In water	3rd
59	21-Jul-17	12:40:23	7.9	2.8	411	27	546	12.7	13.8	199.4	1014	311	5.56	1.92	53.93	760.8853097	0.35	calc.	climate	PA2-2	0.252337636	7.087796191	PA2	S. richardsonii	SPh-PA	In water	3rd
60	21-Jul-17	12:40:33	7.9	3.1	411	28	546	12.7	13.8	199.4	1014	314	6.11	2.29	56.23	760.8853097	0.35	calc.	climate	PA2-2	0.300965201	7.39007565	PA2	S. richardsonii	SPh-PA	In water	3rd
61	21-Jul-17	12:42:07	7.9	3.1	412	22	546	12.8	13.9	199	1014	334	5.98	2.13	43.28	1154.00255	0.35	calc.	climate	PA2-3	0.184574982	3.750424988	PA2	S. richardsonii	SPh-PA	In water	3rd
62	21-Jul-17	12:42:20	8	3.3	412	24	546	12.8	14	198.7	1014	333	6.4	2.52	47.53	1154.00255	0.35	calc.	climate	PA2-3	0.218370401	4.118708403	PA2	S. richardsonii	SPh-PA	In water	3rd
63	21-Jul-17	12:42:30	8	3.3	412	24	546	12.8	14	199.4	1014	334	6.43	2.61	47.1	1154.00255	0.35	calc.	climate	PA2-3	0.226169344	4.081446787	PA2	S. richardsonii	SPh-PA	In water	3rd
64	21-Jul-17	12:42:39	7.9	3.3	412	25	546	12.8	13.9	199	1014	332	6.5	2.76	49.97	1154.00255	0.35	calc.	climate	PA2-3	0.239167582	4.330146411	PA2	S. richardsonii	SPh-PA	In water	3rd
65	21-Jul-17	12:42:59	8	3.3	412	26	546	12.8	14	199.7	1014	329	6.57	2.77	51.58	1154.00255	0.35	calc.	climate	PA2-3	0.240034132	4.469660834	PA2	S. richardsonii	SPh-PA	In water	3rd
66	21-Jul-17	12:43:09	7.9	3.4	412	26	546	12.8	13.8	199	1014	332	6.65	3.16	52.23	1154.00255	0.35	calc.	climate	PA2-3	0.273829551	4.525986533	PA2	S. richardsonii	SPh-PA	In water	3rd
87	25-Jul-17	11:33:37	15.4	2	386	20	546	19.8	21	199	1010	246	3.93	0.64	39.24	888.6541595	0.35	calc.	climate	PA2-1	0.072019018	4.415666047	PA2	S. richardsonii	SPh-PA	Wet	4th
88	25-Jul-17	11:33:44	15.4	2.2	386	22	546	19.8	21	199.7	1010	250	4.35	0.76	42.79	888.6541595	0.35	calc.	climate	PA2-1	0.085522584	4.815146538	PA2	S. richardsonii	SPh-PA	Wet	4th
89	25-Jul-17	11:33:50	15.3	2.4	386	22	546	19.8	21	198.7	1010	260	4.68	0.85	42.8	888.6541595	0.35	calc.	climate	PA2-1	0.095650258	4.816271836	PA2	S. richardsonii	SPh-PA	Wet	4th
90	25-Jul-17	11:33:59	15.3	2.6	386	23	546	19.8	20.9	198.7	1010	262	5.02	0.96	45.56	888.6541595	0.35	calc.	climate	PA2-1	0.108028527	5.126853851	PA2	S. richardsonii	SPh-PA	Wet	4th
91	25-Jul-17	11:34:10	15.2	2.6	386	23	546	19.8	20.9	201	1010	263	5.04	0.97	45.37	888.6541595	0.35	calc.	climate	PA2-1	0.109153824	5.105473205	PA2	S. richardsonii	SPh-PA	Wet	4th
92	25-Jul-17	11:34:18	15.2	2.8	386	24	546	19.8	20.9	199.7	1010	268	5.55	1.16	48.55	888.6541595	0.35	calc.	climate	PA2-1	0.13053447	5.463317701	PA2	S. richardsonii	SPh-PA	Wet	4th
93	25-Jul-17	11:36:33	15.1	2.1	385	24	546	19.8	20.9	198.4	1010	223	4.14	0.7	48.55	760.8853097	0.35	calc.	climate	PA2-2	0.091998096	6.380725108	PA2	S. richardsonii	SPh-PA	Wet	4th
94	25-Jul-17	11:36:42	15.3	2.3	385	24	546	19.7	20.9	198.7	1010	237	4.54	0.79	48.18	760.8853097	0.35	calc.	climate	PA2-2	0.103826423	6.332097543	PA2	S. richardsonii	SPh-PA	Wet	4th
95	25-Jul-17	11:36:51	15.2	2.4	385	26	546	19.7	20.9	198.7	1010	236	4.68	0.85	50.85	760.8853097	0.35	calc.	climate	PA2-2	0.111711974	6.683004567	PA2	S. richardsonii	SPh-PA	Wet	4th
96	25-Jul-17	11:37:01	15.3	2.6	386	26	546	19.8	20.9	198.7	1010	247	5.08	0.97	51.26	760.8853097	0.35	calc.	climate	PA2-2	0.127483076	6.736889167	PA2	S. richardsonii	SPh-PA	Wet	4th
97	25-Jul-17	11:37:09	15.3	2.7	386	27	546	19.7	20.9	199	1010	245	5.27	1.03	53.99	760.8853097	0.35	calc.	climate	PA2-2	0.135368627	7.095681742	PA2	S. richardsonii	SPh-PA	Wet	4th
98	25-Jul-17	11:37:29	15.1	2.7	385	28	546	19.8	20.9	199.4	1010	246	5.36	1.08	55.37	760.8853097	0.35	calc.	climate	PA2-2	0.14193992	7.277049418	PA2	S. richardsonii	SPh-PA	Wet	4th
99	25-Jul-17	11:40:39	15.4	2.6	385	34	546	19.8	20.9	198.7	1010	212	5.13	1.03	67.06	1154.00255	0.35	calc.	climate	PA2-3	0.089254569	5.811079014	PA2	S. richardsonii	SPh-PA	Wet	4th
100	25-Jul-17	11:40:49	15.3	2.9	385	34	546	19.8	21	199.4	1010	226	5.64	1.19	67.04	1154.00255	0.35	calc.	climate	PA2-3	0.103119356	5.809345915	PA2	S. richardsonii	SPh-PA	Wet	4th
101	25-Jul-17	11:40:58	15.3	2.9	385	36	546	19.8	21	199	1010	221	5.75	1.27	71.64	1154.00255	0.35	calc.	climate	PA2-3	0.11005175	6.207958553	PA2	S. richardsonii	SPh-PA	Wet	4th
102	25-Jul-17	11:41:11	15.3	3.2	385	36	546	19.8	21	201.4	1010	238	6.35	1.52	71.1	1154.00255	0.35	calc.	climate	PA2-3	0.13171548	6.161164895	PA2	S. richardsonii	SPh-PA	Wet	4th
103	25-Jul-17	11:41:17	15.3	3.2	385	38	546	19.8	20.9	198.7	1010	233	6.36	1.58	74.98	1154.00255	0.35	calc.	climate	PA2-3	0.136914775	6.497385989	PA2	S. richardsonii	SPh-PA	Wet	4th
104	27-Jul-17	12:18:02	12.5	6.8	378	26	546	24.3	25.4	201.4	1000	266	13.5	1.58	52.66	888.6541595	0.35	calc.	climate	PA2-1	0.177796951	5.925814833	PA2	S. richardsonii	SPh-PA	Wet	5th
105	27-Jul-17	12:18:09	12.5	6.9	378	29	546	24.3	25.4	200	1000	257	13.89	1.66	59	888.6541595	0.35	calc.	climate	PA2-1	0.186799328	6.639253231	PA2	S. richardsonii	SPh-PA	Wet	5th
106	27-Jul-17	12:18:20	12.7	7	378	30	546	24.5	25.6	199	1000	255	13.84	1.62	59.05	888.6541595	0.35	calc.	climate	PA2-1	0.18229814	6.644879717	PA2	S. richardsonii	SPh-PA	Wet	5th
107	27-Jul-17	12:18:32	12.6	7.1	378	32	546	24.5	25.6	198.7	1000	249	14.09	1.71	64.21	888.6541595	0.35	calc.	climate	PA2-1	0.192425814	7.225533051	PA2	S. richardsonii	SPh-PA	Wet	5th
108	27-Jul-17	12:18:38	12.7	7.3	378	32	546	24.6	25.7	198.7	1000	250	14.51	1.76	64.3	888.6541595	0.35	calc.	climate	PA2-1	0.1980523	7.235660725	PA2	S. richardsonii	SPh-PA	Wet	5th
109	27-Jul-17	12:18:47	12.5	7.4	378	34	546	24.6	25.8	198.7	1000	245	14.77	1.83	68.23	888.6541595	0.35	calc.	climate	PA2-1	0.20592938	7.677902508	PA2	S. richardsonii	SPh-PA	Wet	5th
110	27-Jul-17	12:20:33	12.5	6.6	377	26	546	24.4	25.5	201	1000	261	13.06	1.41	51.92	760.8853097	0.35	calc.	climate	PA2-2	0.185310451	6.823630229	PA2	S. richardsonii	SPh-PA	Wet	5th
111	27-Jul-17	12:20:51	12.3	6.6	377	29	546	24.4	25.5	199	1000	250	13.18	1.47	58.15	760.8853097	0.35	calc.	climate	PA2-2	0.193196002	7.642413286	PA2	S. richardsonii	SPh-PA	Wet	5th
112	27-Jul-17	12:21:01	12.3	7	377	31	546	24.3	25.5	199	1000	248	13.84	1.61	62.21	760.8853097	0.35	calc.	climate	PA2-2	0.211595622	8.176002245	PA2	S. richardsonii	SPh-PA	Wet	5th
113	27-Jul-17	12:21:11	12.5	6.9	377	31	546	24.3	25.5	199.4	1000	250	13.78	1.62	61.64	760.8853097	0.35	calc.	climate	PA2-2	0.21290988	8.101089509	PA2	S. richardsonii	SPh-PA	Wet	5th
114	27-Jul-17	12:21:20	12.4	7	377	33	546	24.3	25.4	198	1000	245	13.87	1.67	64.72	760.8853097	0.35	calc.	climate	PA2-2	0.219481173	8.505881133	PA2	S. richardsonii	SPh-PA	Wet	5th
115	27-Jul-17	12:23:25	12.6	8.1	377	40	546	24.5	25.6	201	1000	241	16.17	2.47	79.9	1154.00255	0.35	calc.	climate	PA2-3	0.214037655	6.923728201	PA2	S. richardsonii	SPh-PA	Wet	5th
116	27-Jul-17	12:23:35	12.6	8.3	377	42	546	24.5	25.6	199.4	1000	236	16.37	2.57	84.17	1154.00255	0.35	calc.	climate	PA2-3	0.222703147	7.293744715	PA2	S. richardsonii	SPh-PA	Wet	5th
117	27-Jul-17	12:23:43	12.7	8.3	377	43	546	24.5	25.6	200	1000	236	16.58	2.66	85.86	1154.00255	0.35	calc.	climate	PA2-3	0.23050209	7.440191532	PA2	S. richardsonii	SPh-PA	Wet	5th
118	27-Jul-17	12:23:52	12.7	8.3	377	45	546	24.5	25.7	199.4	1000	229	16.56	2.63	90.41	1154.00255	0.35	calc.	climate	PA2-3	0.227902443	7.834471423	PA2	S. richardsonii	SPh-PA	Wet	5th
119	27-Jul-17	12:24:02	12.7	8.5	377	45	546	24.6	25.7	199	1000	231	16.84	2.76	90.33	1154.00255	0.35	calc.	climate	PA2-3	0.239167582	7.827539029	PA2	S. richardsonii	SPh-PA	Wet	5th
120	27-Jul-17	12:24:12	12.7	8.5	377	47	546	24.6	25.7	199.4	1000	228	16.88	2.83	93.42	1154.00255	0.35	calc.	climate	PA2-3	0.245233427	8.095302736	PA2	S. richardsonii	SPh-PA	Wet	5th
121	27-Jul-17	12:24:21	12.8	8.7	377	47	546	24.6	25.7	199	1000	232	17.26	3.11	93.46	1154.00255	0.35	calc.	climate	PA2-3	0.269496805	8.098768933	PA2	S. richardsonii	SPh-PA	Wet	5th
1	15-Jul-17	14:56:00	7.5	1.6	437	21	546	9.6	10.8	199.4	1020	330	3.05	1.09	42.75	945.399737	0.35	calc.	climate	PA3-1	0.115295145	4.521896752	PA3	S. richardsonii	SPh-PA	In water	1st
2	15-Jul-17	14:56:10	7.5	1.6	437	23	546	9.7	10.8	199	1020	327	3.08	1.11	44.79	945.399737	0.35	calc.	climate	PA3-1	0.117410653	4.737678492	PA3	S. richardsonii	SPh-PA	In water	1st
3	15-Jul-17	14:56:20	7.5	1.6	437	22	546	9.6	10.8	200	1020	331	3.14	1.17	44.32	945.399737	0.35	calc.	climate	PA3-1	0.123757174	4.687964071	PA3	S. richardsonii	SPh-PA	In water	1st
4	15-Jul-17	14:56:31	7.6	1.7	437	24	546	9.6	10.8	199	1020	327	3.22	1.22	46.99	945.399737	0.35	calc.	climate	PA3-1	0.129045942	4.970384289	PA3	S. richardsonii	SPh-PA	In water	1st
5	15-Jul-17	14:56:48	7.6	1.7	437	24	546	9.6	10.8	200.4	1020	329	3.34	1.35	48.77	945.399737	0.35	calc.	climate	PA3-1	0.14279674	5.158664435	PA3	S. richardsonii	SPh-PA	In water	1st
6	15-Jul-17	14:56:54	7.6	1.7	437	24	546	9.7	10.8	199.7	1020	329	3.34	1.35	48.77	945.399737	0.35	calc.	climate	PA3-1	0.14279674	5.158664435	PA3	S. richardsonii	SPh-PA	In water	1st
7	15-Jul-17	14:58:07	7.5	1.1	437	21	546	9.5	10.6	198.7	1020	289	2.13	0.64	41.63	1254.036968	0.35	calc.	climate	PA3-2	0.051035178	3.319678851	PA3	S. richardsonii	SPh-PA	In water	1st
8	15-Jul-17	14:58:15	7.5	1.2	436	20	546	9.4	10.6	201	1020	304	2.3	0.71	40.15	1254.036968	0.35	calc.	climate	PA3-2	0.056617151	3.201660002	PA3	S. richardsonii	SPh-PA	In water	1st
9	15-Jul-17	14:58:23	7.6	1.3	436	21	546	9.5	10.7	198.7	1020	309	2.52	0.81	42.17	1254.036968	0.35	calc.	climate	PA3-2	0.064591397	3.362739782	PA3	S. richardsonii	SPh-PA	In water	1st
10	15-Jul-17	14:58:34	7.6	1.3	436	22	546	9.5	10.6	199.7	1020	317	2.64	0.93	43.42	1254.036968	0.35	calc.	climate	PA3-2	0.074160493	3.462417865	PA3	S. richardsonii	SPh-PA	In water	1st
11	15-Jul-17	14:58:42	7.6	1.4	436	23	546	9.5	10.6	199.7	1020	308	2.65	0.9	45.74	1254.036968	0.35	calc.	climate	PA3-2	0.071768219	3.647420385	PA3	S. richardsonii	SPh-PA	In water	1st
12	15-Jul-17	14:58:53	7.5	1.4	436	23	546	9.4	10.6	200.4	1020	317	2.82	1.04	46.37	1254.036968	0.35	calc.	climate	PA3-2	0.082932164	3.697658139	PA3	S. richardsonii	SPh-PA	In water	1st
13	15-Jul-17	14:59:54	7.5	1.1	436	19	546	9.3	10.4	198.7	1020	310	2.21	0.71	38.24	1025.056497	0.35	calc.	climate	PA3-3	0.069264475	3.730526085	PA3	S. richardsonii	SPh-PA	In water	1st
14	15-Jul-17	15:00:02	7.5	1.2	436	18	546	9.2	10.5	199	1020	323	2.41	0.78	36.66	1025.056497	0.35	calc.	climate	PA3-3	0.076093367	3.576388239	PA3	S. richardsonii	SPh-PA	In water	1st
15	15-Jul-17	15:00:07	7.5	1.4	436	19	546	9.3	10.4	198.7	1020	335	2.63	0.94	36.95	1025.056497	0.35	calc.	climate	PA3-3	0.091702263	3.604679363	PA3	S. richardsonii	SPh-PA	In water	1st
16	15-Jul-17	15:00:18	7.5	1.4	436	19	546	9.2	10.4	200.4	1020	337	2.73	1	37.88	1025.056497	0.35	calc.	climate	PA3-3	0.097555598	3.695406069	PA3	S. richardsonii	SPh-PA	In water	1st
17	15-Jul-17	15:00:28	7.6	1.4	436	18	546	9.2	10.5	201	1020	340	2.73	1.01	36.56	1025.056497	0.35	calc.	climate	PA3-3	0.098531154	3.566632679	PA3	S. richardsonii	SPh-PA	In water	1st
18	15-Jul-17	15:00:39	7.6	1.5	436	19	546	9.2	10.4	199	1020	344	2.95	1.18	38.52	1025.056497	0.35	calc.	climate	PA3-3	0.115115606	3.757841652	PA3	S. richardsonii	SPh-PA	In water	1st
19	18-Jul-17	10:24:00	9.8	2.4	415	22	546	19.1	20.2	200.4	1005	218	4.75	0.48	44.32	945.399737	0.35	calc.	climate	PA3-1	0.050772174	4.687964071	PA3	S. richardsonii	SPh-PA	In water	2nd
20	18-Jul-17	10:24:07	9.8	2.5	415	23	546	19.1	20.2	198.7	1005	221	4.91	0.5	45.24	945.399737	0.35	calc.	climate	PA3-1	0.052887681	4.785277405	PA3	S. richardsonii	SPh-PA	In water	2nd
21	18-Jul-17	10:24:16	9.8	2.5	414	23	546	19.1	20.3	201	1005	224	5.01	0.51	44.92	945.399737	0.35	calc.	climate	PA3-1	0.053945435	4.751429289	PA3	S. richardsonii	SPh-PA	In water	2nd
22	18-Jul-17	10:24:25	9.8	2.6	414	23	546	19.1	20.3	199.4	1005	223	5.08	0.53	46.15	945.399737	0.35	calc.	climate	PA3-1	0.056060942	4.881532985	PA3	S. richardsonii	SPh-PA	In water	2nd
23	18-Jul-17	10:24:35	9.8	2.7	414	23	546	19.1	20.3	200.4	1005	229	5.27	0.55	46.38	945.399737	0.35	calc.	climate	PA3-1	0.058176449	4.905861318	PA3	S. richardsonii	SPh-PA	In water	2nd
24	18-Jul-17	10:24:44	9.7	2.7	414	23	546	19.1	20.3	198.4	1005	228	5.27	0.55	46.47	945.399737	0.35	calc.	climate	PA3-1	0.058176449	4.915381101	PA3	S. richardsonii	SPh-PA	In water	2nd
25	18-Jul-17	10:26:50	9.7	2.6	413	22	546	19	20.2	200.4	1005	229	5.05	0.52	44.13	1254.036968	0.35	calc.	climate	PA3-2	0.041466082	3.519035015	PA3	S. richardsonii	SPh-PA	In water	2nd
26	18-Jul-17	10:26:57	9.7	2.7	413	23	546	19	20.2	199	1005	235	5.31	0.56	45.15	1254.036968	0.35	calc.	climate	PA3-2	0.044655781	3.600372331	PA3	S. richardsonii	SPh-PA	In water	2nd
27	18-Jul-17	10:27:08	9.7	2.8	414	23	546	19	20.1	200.4	1005	243	5.54	0.6	45.4	1254.036968	0.35	calc.	climate	PA3-2	0.047845479	3.620307947	PA3	S. richardsonii	SPh-PA	In water	2nd
28	18-Jul-17	10:27:17	9.7	2.8	414	23	546	19	20.2	199.4	1005	244	5.55	0.6	44.97	1254.036968	0.35	calc.	climate	PA3-2	0.047845479	3.586018687	PA3	S. richardsonii	SPh-PA	In water	2nd
29	18-Jul-17	10:27:27	9.8	2.9	414	22	546	18.9	20.1	201	1005	252	5.7	0.63	44.54	1254.036968	0.35	calc.	climate	PA3-2	0.050237753	3.551729426	PA3	S. richardsonii	SPh-PA	In water	2nd
30	18-Jul-17	10:27:35	9.7	2.9	414	23	546	19	20.1	199.4	1005	247	5.73	0.64	46.39	1254.036968	0.35	calc.	climate	PA3-2	0.051035178	3.699252988	PA3	S. richardsonii	SPh-PA	In water	2nd
31	18-Jul-17	10:29:20	9.6	2.4	413	20	546	18.9	20	199	1005	233	4.67	0.47	40	1025.056497	0.35	calc.	climate	PA3-3	0.045851131	3.902223938	PA3	S. richardsonii	SPh-PA	In water	2nd
32	18-Jul-17	10:29:33	9.6	2.4	413	20	546	18.9	20.1	199.7	1005	235	4.76	0.48	40.14	1025.056497	0.35	calc.	climate	PA3-3	0.046826687	3.915881722	PA3	S. richardsonii	SPh-PA	In water	2nd
33	18-Jul-17	10:29:43	9.6	2.5	413	20	546	18.9	20.1	201.4	1005	242	4.95	0.51	40.2	1025.056497	0.35	calc.	climate	PA3-3	0.049753355	3.921735058	PA3	S. richardsonii	SPh-PA	In water	2nd
34	18-Jul-17	10:29:52	9.6	2.5	413	20	546	19	20.1	198.7	1005	247	5.02	0.52	39.58	1025.056497	0.35	calc.	climate	PA3-3	0.050728911	3.861250587	PA3	S. richardsonii	SPh-PA	In water	2nd
35	18-Jul-17	10:30:08	9.6	2.6	413	20	546	19	20.1	199.4	1005	250	5.18	0.54	40.05	1025.056497	0.35	calc.	climate	PA3-3	0.052680023	3.907101718	PA3	S. richardsonii	SPh-PA	In water	2nd
36	18-Jul-17	10:30:20	9.6	2.6	413	21	546	19	20.1	201	1005	245	5.12	0.53	40.89	1025.056497	0.35	calc.	climate	PA3-3	0.051704467	3.989048421	PA3	S. richardsonii	SPh-PA	In water	2nd
37	21-Jul-17	13:07:59	7.7	2.2	412	15	546	11.7	12.8	199.4	1014	341	4.23	1.21	29.56	945.399737	0.35	calc.	climate	PA3-1	0.127988189	3.126719719	PA3	S. richardsonii	SPh-PA	In water	3rd
38	21-Jul-17	13:08:04	7.6	2.2	412	18	546	11.7	12.8	198.7	1014	331	4.35	1.28	34.99	945.399737	0.35	calc.	climate	PA3-1	0.135392464	3.701079938	PA3	S. richardsonii	SPh-PA	In water	3rd
39	21-Jul-17	13:08:13	7.6	2.3	412	18	546	11.7	12.8	199.7	1014	334	4.49	1.38	35.4	945.399737	0.35	calc.	climate	PA3-1	0.14597	3.744447837	PA3	S. richardsonii	SPh-PA	In water	3rd
40	21-Jul-17	13:08:22	7.6	2.4	412	20	546	11.7	12.9	198.7	1014	329	4.75	1.48	39.09	945.399737	0.35	calc.	climate	PA3-1	0.156547537	4.134758925	PA3	S. richardsonii	SPh-PA	In water	3rd
41	21-Jul-17	13:08:32	7.7	2.3	412	19	546	11.7	12.8	198.7	1014	330	4.6	1.49	38.65	945.399737	0.35	calc.	climate	PA3-1	0.15760529	4.088217765	PA3	S. richardsonii	SPh-PA	In water	3rd
42	21-Jul-17	13:08:42	7.7	2.4	412	20	546	11.7	13	199.4	1014	327	4.79	1.52	40.46	945.399737	0.35	calc.	climate	PA3-1	0.160778551	4.279671172	PA3	S. richardsonii	SPh-PA	In water	3rd
43	21-Jul-17	13:10:47	8	2.9	412	11	546	11.8	13	200	1014	374	5.66	2.64	22.47	1254.036968	0.35	calc.	climate	PA3-2	0.21052011	1.791813206	PA3	S. richardsonii	SPh-PA	In water	3rd
44	21-Jul-17	13:10:55	8	3	412	12	546	12	13.1	199.7	1014	374	5.87	2.91	23.4	1254.036968	0.35	calc.	climate	PA3-2	0.232050575	1.8659737	PA3	S. richardsonii	SPh-PA	In water	3rd
45	21-Jul-17	13:11:04	8.1	2.9	413	12	546	11.9	13.1	198.7	1014	373	5.65	2.75	24.16	1254.036968	0.35	calc.	climate	PA3-2	0.219291781	1.926577974	PA3	S. richardsonii	SPh-PA	In water	3rd
46	21-Jul-17	13:11:13	8.1	3	413	12	546	12	13.1	198.7	1014	374	5.8	2.97	23.92	1254.036968	0.35	calc.	climate	PA3-2	0.236835123	1.907439782	PA3	S. richardsonii	SPh-PA	In water	3rd
47	21-Jul-17	13:11:23	8.1	3.1	413	12	546	12	13.1	199	1014	375	6.01	3.25	23.66	1254.036968	0.35	calc.	climate	PA3-2	0.259163014	1.886706741	PA3	S. richardsonii	SPh-PA	In water	3rd
48	21-Jul-17	13:11:33	8.1	3	413	12	546	11.9	13.1	199	1014	375	5.91	3.01	23.44	1254.036968	0.35	calc.	climate	PA3-2	0.240024822	1.869163398	PA3	S. richardsonii	SPh-PA	In water	3rd
49	21-Jul-17	13:13:38	8.3	2.5	412	17	546	12.2	13.4	200.4	1014	347	4.89	1.74	33.29	1025.056497	0.35	calc.	climate	PA3-3	0.169746741	3.247625872	PA3	S. richardsonii	SPh-PA	In water	3rd
50	21-Jul-17	13:13:46	8.3	2.6	412	18	546	12.2	13.4	199	1014	344	5.2	1.99	36.89	1025.056497	0.35	calc.	climate	PA3-3	0.194135641	3.598826027	PA3	S. richardsonii	SPh-PA	In water	3rd
51	21-Jul-17	13:13:57	8.3	2.7	412	18	546	12.3	13.4	201	1014	345	5.2	1.97	36.42	1025.056497	0.35	calc.	climate	PA3-3	0.192184529	3.552974896	PA3	S. richardsonii	SPh-PA	In water	3rd
52	21-Jul-17	13:14:05	8.3	2.7	412	20	546	12.3	13.4	198.4	1014	340	5.24	2.07	39.91	1025.056497	0.35	calc.	climate	PA3-3	0.201940089	3.893443934	PA3	S. richardsonii	SPh-PA	In water	3rd
53	21-Jul-17	13:14:15	8.4	2.7	412	20	546	12.3	13.5	198.7	1014	339	5.3	2.07	40.25	1025.056497	0.35	calc.	climate	PA3-3	0.201940089	3.926612838	PA3	S. richardsonii	SPh-PA	In water	3rd
54	21-Jul-17	13:14:25	8.3	2.7	412	21	546	12.3	13.5	199.4	1014	339	5.39	2.19	41.47	1025.056497	0.35	calc.	climate	PA3-3	0.213646761	4.045630668	PA3	S. richardsonii	SPh-PA	In water	3rd
75	25-Jul-17	11:48:13	16	1.9	384	22	546	19.8	20.9	199.4	1010	228	3.72	0.66	44.65	945.399737	0.35	calc.	climate	PA3-1	0.069811739	4.722869941	PA3	S. richardsonii	SPh-PA	Wet	4th
76	25-Jul-17	11:48:30	16	2.2	384	25	546	19.8	20.9	200.4	1010	240	4.33	0.84	49.24	945.399737	0.35	calc.	climate	PA3-1	0.088851305	5.208378855	PA3	S. richardsonii	SPh-PA	Wet	4th
77	25-Jul-17	11:48:35	16	2.2	384	26	546	19.7	20.9	198.4	1010	237	4.41	0.9	52.12	945.399737	0.35	calc.	climate	PA3-1	0.095197826	5.5130119	PA3	S. richardsonii	SPh-PA	Wet	4th
78	25-Jul-17	11:48:46	15.9	2.4	384	26	546	19.7	20.9	199.4	1010	246	4.67	0.96	51.07	945.399737	0.35	calc.	climate	PA3-1	0.101544348	5.401947769	PA3	S. richardsonii	SPh-PA	Wet	4th
79	25-Jul-17	11:48:54	15.9	2.6	384	28	546	19.7	20.9	199	1010	251	5.11	1.16	54.99	945.399737	0.35	calc.	climate	PA3-1	0.122699421	5.81658719	PA3	S. richardsonii	SPh-PA	Wet	4th
80	25-Jul-17	11:49:05	16	2.7	384	28	546	19.7	20.9	198.7	1010	257	5.35	1.26	54.77	945.399737	0.35	calc.	climate	PA3-1	0.133276957	5.793316611	PA3	S. richardsonii	SPh-PA	Wet	4th
81	25-Jul-17	11:50:59	16	2.2	384	24	546	19.6	20.8	200	1010	247	4.37	0.89	48.09	1254.036968	0.35	calc.	climate	PA3-2	0.070970795	3.83481518	PA3	S. richardsonii	SPh-PA	Wet	4th
82	25-Jul-17	11:51:08	15.9	2.4	384	26	546	19.6	20.7	199	1010	256	4.81	1.08	50.96	1254.036968	0.35	calc.	climate	PA3-2	0.086121863	4.063676057	PA3	S. richardsonii	SPh-PA	Wet	4th
83	25-Jul-17	11:51:18	15.9	2.4	384	25	546	19.6	20.7	198.7	1010	258	4.81	1.1	50.41	1254.036968	0.35	calc.	climate	PA3-2	0.087716712	4.019817701	PA3	S. richardsonii	SPh-PA	Wet	4th
84	25-Jul-17	11:51:27	16	2.6	384	27	546	19.6	20.8	198.4	1010	257	5.13	1.2	53.3	1254.036968	0.35	calc.	climate	PA3-2	0.095690959	4.250273427	PA3	S. richardsonii	SPh-PA	Wet	4th
85	25-Jul-17	11:51:37	15.9	2.7	384	27	546	19.5	20.7	199.4	1010	265	5.36	1.37	54.33	1254.036968	0.35	calc.	climate	PA3-2	0.109247178	4.332408167	PA3	S. richardsonii	SPh-PA	Wet	4th
86	25-Jul-17	11:51:46	15.8	2.9	384	28	546	19.6	20.7	199.7	1010	269	5.77	1.6	56.83	1254.036968	0.35	calc.	climate	PA3-2	0.127587945	4.531764331	PA3	S. richardsonii	SPh-PA	Wet	4th
87	25-Jul-17	11:53:59	15.8	2.3	384	19	546	19.4	20.6	199.4	1010	280	4.5	0.97	38.58	1025.056497	0.35	calc.	climate	PA3-3	0.09462893	3.763694988	PA3	S. richardsonii	SPh-PA	Wet	4th
88	25-Jul-17	11:54:09	15.8	2.3	384	20	546	19.3	20.6	199	1010	280	4.59	1	39.36	1025.056497	0.35	calc.	climate	PA3-3	0.097555598	3.839788355	PA3	S. richardsonii	SPh-PA	Wet	4th
89	25-Jul-17	11:54:18	15.8	2.4	384	22	546	19.4	20.6	198.7	1010	272	4.75	1.07	44.18	1025.056497	0.35	calc.	climate	PA3-3	0.10438449	4.31000634	PA3	S. richardsonii	SPh-PA	Wet	4th
90	25-Jul-17	11:54:28	15.9	2.5	384	22	546	19.4	20.6	199.4	1010	280	4.95	1.18	43.25	1025.056497	0.35	calc.	climate	PA3-3	0.115115606	4.219279633	PA3	S. richardsonii	SPh-PA	Wet	4th
91	25-Jul-17	11:54:37	15.7	2.6	384	23	546	19.3	20.6	199.4	1010	275	5.03	1.22	46.24	1025.056497	0.35	calc.	climate	PA3-3	0.11901783	4.510970872	PA3	S. richardsonii	SPh-PA	Wet	4th
92	25-Jul-17	11:54:56	15.7	2.7	384	25	546	19.3	20.6	199	1010	276	5.37	1.38	48.93	1025.056497	0.35	calc.	climate	PA3-3	0.134626726	4.773395432	PA3	S. richardsonii	SPh-PA	Wet	4th
93	27-Jul-17	12:49:45	13.5	5.5	379	22	546	23.3	24.5	200.4	1000	279	11.02	1.38	43.92	945.399737	0.35	calc.	climate	PA3-1	0.14597	4.645653926	PA3	S. richardsonii	SPh-PA	Wet	5th
94	27-Jul-17	12:49:54	13.4	5.7	379	27	546	23.3	24.5	199.4	1000	262	11.27	1.48	53.75	945.399737	0.35	calc.	climate	PA3-1	0.156547537	5.685425741	PA3	S. richardsonii	SPh-PA	Wet	5th
95	27-Jul-17	12:50:13	13.2	6.2	379	29	546	23.2	24.5	198.7	1000	265	12.25	1.74	57.17	945.399737	0.35	calc.	climate	PA3-1	0.184049131	6.047177481	PA3	S. richardsonii	SPh-PA	Wet	5th
96	27-Jul-17	12:50:23	13.1	6.3	378	28	546	23.2	24.4	200.4	1000	269	12.48	1.86	56.38	945.399737	0.35	calc.	climate	PA3-1	0.196742174	5.963614944	PA3	S. richardsonii	SPh-PA	Wet	5th
97	27-Jul-17	12:50:41	12.9	6.5	378	29	546	23.2	24.3	199.4	1000	271	13.05	2.07	58.18	945.399737	0.35	calc.	climate	PA3-1	0.218955001	6.154010597	PA3	S. richardsonii	SPh-PA	Wet	5th
98	27-Jul-17	12:50:54	13	6.6	378	30	546	23	24.2	199.7	1000	269	13.16	2.16	60.54	945.399737	0.35	calc.	climate	PA3-1	0.228474783	6.403640453	PA3	S. richardsonii	SPh-PA	Wet	5th
99	27-Jul-17	12:51:04	12.9	6.6	378	30	546	23	24.2	200.7	1000	269	13.08	2.17	60.55	945.399737	0.35	calc.	climate	PA3-1	0.229532537	6.404698207	PA3	S. richardsonii	SPh-PA	Wet	5th
100	27-Jul-17	12:51:16	13	7	378	32	546	23	24.2	199.4	1000	268	13.82	2.39	63.86	945.399737	0.35	calc.	climate	PA3-1	0.252803117	6.754814657	PA3	S. richardsonii	SPh-PA	Wet	5th
101	27-Jul-17	12:52:30	12.7	6.4	378	29	546	23.3	24.4	200	1000	267	12.67	1.86	57.6	1254.036968	0.35	calc.	climate	PA3-2	0.148320986	4.59316603	PA3	S. richardsonii	SPh-PA	Wet	5th
102	27-Jul-17	12:52:36	12.9	6.9	378	29	546	23.3	24.4	200.4	1000	276	13.73	2.25	57.2	1254.036968	0.35	calc.	climate	PA3-2	0.179420548	4.561269043	PA3	S. richardsonii	SPh-PA	Wet	5th
103	27-Jul-17	12:52:45	12.8	7.5	378	35	546	23.4	24.5	199.4	1000	266	14.91	2.77	68.93	1254.036968	0.35	calc.	climate	PA3-2	0.22088663	5.496648167	PA3	S. richardsonii	SPh-PA	Wet	5th
104	27-Jul-17	12:52:59	12.8	7.7	378	35	546	23.4	24.6	198.7	1000	268	15.38	2.97	69.13	1254.036968	0.35	calc.	climate	PA3-2	0.236835123	5.51259666	PA3	S. richardsonii	SPh-PA	Wet	5th
105	27-Jul-17	12:53:11	12.7	8	378	39	546	23.5	24.6	199.4	1000	261	16.05	3.42	77.69	1254.036968	0.35	calc.	climate	PA3-2	0.272719233	6.195192167	PA3	S. richardsonii	SPh-PA	Wet	5th
106	27-Jul-17	12:53:17	12.8	8.3	378	39	546	23.6	24.7	201	1000	265	16.54	3.78	77.5	1254.036968	0.35	calc.	climate	PA3-2	0.301426521	6.180041099	PA3	S. richardsonii	SPh-PA	Wet	5th
107	27-Jul-17	12:53:23	12.8	8.4	378	42	546	23.6	24.7	199.4	1000	258	16.81	3.95	83.03	1254.036968	0.35	calc.	climate	PA3-2	0.31498274	6.621016935	PA3	S. richardsonii	SPh-PA	Wet	5th
108	27-Jul-17	12:53:32	12.8	8.6	378	42	546	23.7	24.8	198.4	1000	260	17.01	4.13	82.68	1254.036968	0.35	calc.	climate	PA3-2	0.329336384	6.593107072	PA3	S. richardsonii	SPh-PA	Wet	5th
109	27-Jul-17	12:53:40	12.8	8.7	378	44	546	23.8	24.8	199	1000	256	17.34	4.36	87.33	1254.036968	0.35	calc.	climate	PA3-2	0.347677151	6.963909538	PA3	S. richardsonii	SPh-PA	Wet	5th
110	27-Jul-17	12:54:50	12.8	9	379	22	546	23.9	25	201	1000	317	17.86	4.75	43.19	1025.056497	0.35	calc.	climate	PA3-3	0.463389093	4.213426297	PA3	S. richardsonii	SPh-PA	Wet	5th
111	27-Jul-17	12:54:59	13.3	8	379	29	546	23.9	25	199.4	1000	286	15.92	2.92	57.22	1025.056497	0.35	calc.	climate	PA3-3	0.284862347	5.582131343	PA3	S. richardsonii	SPh-PA	Wet	5th
112	27-Jul-17	12:55:09	12.8	7.9	378	28	546	24	25.1	199	1000	287	15.8	3	56.6	1025.056497	0.35	calc.	climate	PA3-3	0.292666795	5.521646872	PA3	S. richardsonii	SPh-PA	Wet	5th
113	27-Jul-17	12:55:17	12.4	8.5	378	34	546	24	25.1	198.7	1000	275	16.97	3.59	68.72	1025.056497	0.35	calc.	climate	PA3-3	0.350224598	6.704020725	PA3	S. richardsonii	SPh-PA	Wet	5th
114	27-Jul-17	12:55:28	12.9	9.1	379	35	546	24	25.2	200	1000	279	18.22	4.27	70.54	1025.056497	0.35	calc.	climate	PA3-3	0.416562405	6.881571915	PA3	S. richardsonii	SPh-PA	Wet	5th
115	27-Jul-17	12:55:47	12.9	8.9	379	38	546	24.1	25.3	200.4	1000	270	17.76	4.05	76.17	1025.056497	0.35	calc.	climate	PA3-3	0.395100174	7.430809934	PA3	S. richardsonii	SPh-PA	Wet	5th
116	27-Jul-17	12:55:55	12.9	9.1	379	40	546	24.1	25.3	199.7	1000	266	18.21	4.45	80.53	1025.056497	0.35	calc.	climate	PA3-3	0.434122413	7.856152343	PA3	S. richardsonii	SPh-PA	Wet	5th
117	27-Jul-17	12:56:06	12.8	9.2	379	41	546	24.2	25.3	199	1000	267	18.32	4.61	81.03	1025.056497	0.35	calc.	climate	PA3-3	0.449731309	7.904930142	PA3	S. richardsonii	SPh-PA	Wet	5th
118	27-Jul-17	12:56:15	12.9	9.3	379	42	546	24.2	25.5	199.4	1000	262	18.47	4.41	83.53	1025.056497	0.35	calc.	climate	PA3-3	0.430220189	8.148819139	PA3	S. richardsonii	SPh-PA	Wet	5th
1	15-Jul-17	15:05:54	7.7	0.9	437	18	546	9.4	10.6	201	1020	282	1.66	0.47	35.01	508.1378705	0.35	calc.	climate	PA4-1	0.092494582	6.889862384	PA4	S. pulchra	SPh-PA	In water	1st
2	15-Jul-17	15:06:11	7.8	0.9	437	16	546	9.6	10.7	200.7	1020	297	1.76	0.5	32.66	508.1378705	0.35	calc.	climate	PA4-1	0.098398492	6.427389474	PA4	S. pulchra	SPh-PA	In water	1st
3	15-Jul-17	15:06:22	7.7	0.9	437	15	546	9.6	10.6	198.7	1020	315	1.8	0.53	30.15	508.1378705	0.35	calc.	climate	PA4-1	0.104302401	5.933429046	PA4	S. pulchra	SPh-PA	In water	1st
4	15-Jul-17	15:06:33	7.8	1	437	15	546	9.6	10.7	200.7	1020	316	1.88	0.55	30.43	508.1378705	0.35	calc.	climate	PA4-1	0.108238341	5.988532201	PA4	S. pulchra	SPh-PA	In water	1st
5	15-Jul-17	15:06:39	7.8	1	437	15	546	9.5	10.7	199.7	1020	322	1.92	0.56	29.51	508.1378705	0.35	calc.	climate	PA4-1	0.110206311	5.807478976	PA4	S. pulchra	SPh-PA	In water	1st
6	15-Jul-17	15:06:52	7.8	1	437	14	546	9.5	10.7	200.4	1020	327	1.94	0.58	28.77	508.1378705	0.35	calc.	climate	PA4-1	0.11414225	5.661849209	PA4	S. pulchra	SPh-PA	In water	1st
7	15-Jul-17	15:07:56	7.8	1	437	19	546	9.5	10.7	199.7	1020	282	1.87	0.54	38.69	662.4882094	0.35	calc.	climate	PA4-2	0.081510885	5.840103937	PA4	S. pulchra	SPh-PA	In water	1st
8	15-Jul-17	15:08:14	7.8	1.1	436	21	546	9.5	10.6	198.7	1020	302	2.15	0.7	40.83	662.4882094	0.35	calc.	climate	PA4-2	0.105662258	6.163128554	PA4	S. pulchra	SPh-PA	In water	1st
9	15-Jul-17	15:08:34	7.8	1.3	437	22	546	9.5	10.7	199	1020	310	2.47	0.85	43.45	662.4882094	0.35	calc.	climate	PA4-2	0.12830417	6.55860729	PA4	S. pulchra	SPh-PA	In water	1st
10	15-Jul-17	15:08:43	7.8	1.3	436	21	546	9.5	10.7	201	1020	314	2.48	0.87	42.71	662.4882094	0.35	calc.	climate	PA4-2	0.131323092	6.446907189	PA4	S. pulchra	SPh-PA	In water	1st
11	15-Jul-17	15:08:54	7.8	1.3	436	22	546	9.5	10.7	199.7	1020	309	2.47	0.87	44.31	662.4882094	0.35	calc.	climate	PA4-2	0.131323092	6.688420922	PA4	S. pulchra	SPh-PA	In water	1st
12	15-Jul-17	15:09:08	7.9	1.3	436	22	546	9.5	10.7	198.4	1020	315	2.62	0.95	44.75	662.4882094	0.35	calc.	climate	PA4-2	0.143398779	6.754837198	PA4	S. pulchra	SPh-PA	In water	1st
13	15-Jul-17	15:10:48	7.9	1	437	21	546	9.6	10.7	198.7	1020	277	1.87	0.57	41.45	542.4352368	0.35	calc.	climate	PA4-3	0.105081669	7.641465227	PA4	S. pulchra	SPh-PA	In water	1st
14	15-Jul-17	15:10:59	8	1	437	21	546	9.5	10.7	200.7	1020	284	1.95	0.6	40.97	542.4352368	0.35	calc.	climate	PA4-3	0.110612283	7.552975401	PA4	S. pulchra	SPh-PA	In water	1st
15	15-Jul-17	15:11:10	7.9	1	437	18	546	9.6	10.7	199	1020	312	2.05	0.66	35.9	542.4352368	0.35	calc.	climate	PA4-3	0.121673511	6.618301608	PA4	S. pulchra	SPh-PA	In water	1st
16	15-Jul-17	15:11:16	7.9	1.1	436	18	546	9.5	10.7	201	1020	320	2.17	0.71	35.34	542.4352368	0.35	calc.	climate	PA4-3	0.130891202	6.515063477	PA4	S. pulchra	SPh-PA	In water	1st
17	15-Jul-17	15:11:25	8	1.2	436	18	546	9.5	10.7	199.7	1020	328	2.27	0.78	34.94	542.4352368	0.35	calc.	climate	PA4-3	0.143795968	6.441321955	PA4	S. pulchra	SPh-PA	In water	1st
18	15-Jul-17	15:11:35	8	1.2	436	17	546	9.5	10.7	200.4	1020	330	2.28	0.79	34.56	542.4352368	0.35	calc.	climate	PA4-3	0.145639506	6.371267509	PA4	S. pulchra	SPh-PA	In water	1st
20	18-Jul-17	10:47:37	9	1.8	411	16	546	18.3	19.5	199	1005	220	3.5	0.33	31.48	508.1378705	0.35	calc.	climate	PA4-1	0.064943004	6.195169033	PA4	S. pulchra	SPh-PA	In water	2nd
21	18-Jul-17	10:47:45	8.9	1.8	410	15	546	18.3	19.5	200.7	1005	226	3.53	0.33	30.85	508.1378705	0.35	calc.	climate	PA4-1	0.064943004	6.071186934	PA4	S. pulchra	SPh-PA	In water	2nd
22	18-Jul-17	10:47:55	9	2	410	15	546	18.3	19.5	198.7	1005	250	3.92	0.38	29.67	508.1378705	0.35	calc.	climate	PA4-1	0.074782854	5.838966494	PA4	S. pulchra	SPh-PA	In water	2nd
23	18-Jul-17	10:48:17	9	2	411	15	546	18.3	19.5	199	1005	253	3.92	0.38	29.26	508.1378705	0.35	calc.	climate	PA4-1	0.074782854	5.758279731	PA4	S. pulchra	SPh-PA	In water	2nd
24	18-Jul-17	10:48:24	9	2.1	411	15	546	18.3	19.5	201	1005	257	4.07	0.4	29.6	508.1378705	0.35	calc.	climate	PA4-1	0.078718793	5.825190705	PA4	S. pulchra	SPh-PA	In water	2nd
25	18-Jul-17	10:48:33	9	2	411	15	546	18.3	19.5	198.7	1005	248	3.93	0.38	30.35	508.1378705	0.35	calc.	climate	PA4-1	0.074782854	5.972788442	PA4	S. pulchra	SPh-PA	In water	2nd
26	18-Jul-17	10:50:10	8.9	2.6	410	23	546	18.2	19.3	198.7	1005	231	5.11	0.56	45.39	662.4882094	0.35	calc.	climate	PA4-2	0.084529806	6.851442691	PA4	S. pulchra	SPh-PA	In water	2nd
27	18-Jul-17	10:50:18	8.9	2.6	410	23	546	18.2	19.3	201	1005	232	5.16	0.57	45.35	662.4882094	0.35	calc.	climate	PA4-2	0.086039267	6.845404847	PA4	S. pulchra	SPh-PA	In water	2nd
28	18-Jul-17	10:50:27	8.9	2.7	410	24	546	18.2	19.4	199	1005	233	5.4	0.6	47.18	662.4882094	0.35	calc.	climate	PA4-2	0.09056765	7.121636179	PA4	S. pulchra	SPh-PA	In water	2nd
29	18-Jul-17	10:50:46	8.9	2.9	410	24	546	18.2	19.3	198.4	1005	241	5.71	0.66	48.28	662.4882094	0.35	calc.	climate	PA4-2	0.099624415	7.28767687	PA4	S. pulchra	SPh-PA	In water	2nd
30	18-Jul-17	10:50:56	8.8	3	410	25	546	18.2	19.4	200.4	1005	246	6.03	0.71	49.15	662.4882094	0.35	calc.	climate	PA4-2	0.107171719	7.418999961	PA4	S. pulchra	SPh-PA	In water	2nd
31	18-Jul-17	10:51:14	8.9	3.2	410	26	546	18.2	19.4	199.7	1005	248	6.3	0.76	50.93	662.4882094	0.35	calc.	climate	PA4-2	0.114719023	7.687683989	PA4	S. pulchra	SPh-PA	In water	2nd
33	18-Jul-17	10:54:49	8.6	1.7	410	16	546	17.7	18.8	198.7	1005	227	3.46	0.34	31.58	490.7355617	0.35	calc.	climate	PA4-3	0.06928375	6.435237726	PA4	S. pulchra	SPh-PA	In water	2nd
34	18-Jul-17	10:54:56	8.7	1.9	410	15	546	17.6	18.8	199.7	1005	243	3.69	0.37	30.56	490.7355617	0.35	calc.	climate	PA4-3	0.075397022	6.227386476	PA4	S. pulchra	SPh-PA	In water	2nd
35	18-Jul-17	10:55:14	8.8	1.9	410	15	546	17.7	18.8	199.4	1005	244	3.71	0.38	30.8	490.7355617	0.35	calc.	climate	PA4-3	0.077434779	6.276292652	PA4	S. pulchra	SPh-PA	In water	2nd
36	18-Jul-17	10:55:23	8.8	2	410	15	546	17.6	18.8	200.4	1005	255	4	0.41	30.78	490.7355617	0.35	calc.	climate	PA4-3	0.083548052	6.272217137	PA4	S. pulchra	SPh-PA	In water	2nd
37	18-Jul-17	10:55:34	8.7	2	410	15	546	17.7	18.8	198.7	1005	256	3.87	0.4	29.84	490.7355617	0.35	calc.	climate	PA4-3	0.081510294	6.080667946	PA4	S. pulchra	SPh-PA	In water	2nd
38	18-Jul-17	10:55:47	8.7	2	410	15	546	17.7	18.8	198.4	1005	262	4.01	0.42	29.95	490.7355617	0.35	calc.	climate	PA4-3	0.085585809	6.103083277	PA4	S. pulchra	SPh-PA	In water	2nd
39	21-Jul-17	12:24:17	7.2	2.8	407	8	546	13.2	14.4	199	1014	368	5.4	1.18	15.26	508.1378705	0.35	calc.	climate	PA4-1	0.23222044	3.003121965	PA4	S. pulchra	SPh-PA	In water	3rd
40	21-Jul-17	12:24:26	7.2	2.6	407	8	546	13.3	14.4	201.4	1014	366	5.17	1.09	15.25	508.1378705	0.35	calc.	climate	PA4-1	0.214508712	3.001153995	PA4	S. pulchra	SPh-PA	In water	3rd
41	21-Jul-17	12:24:34	7.3	2.7	407	10	546	13.3	14.4	199.7	1014	355	5.29	1.16	20.41	508.1378705	0.35	calc.	climate	PA4-1	0.228284501	4.016626429	PA4	S. pulchra	SPh-PA	In water	3rd
42	21-Jul-17	12:24:44	7.3	2.6	407	11	546	13.2	14.4	199	1014	352	5.17	1.09	21.1	508.1378705	0.35	calc.	climate	PA4-1	0.214508712	4.152416347	PA4	S. pulchra	SPh-PA	In water	3rd
43	21-Jul-17	12:24:53	7.2	2.6	407	12	546	13.2	14.3	199.4	1014	346	5.04	1.09	23.77	508.1378705	0.35	calc.	climate	PA4-1	0.214508712	4.677864292	PA4	S. pulchra	SPh-PA	In water	3rd
44	21-Jul-17	12:25:03	7.2	2.6	408	13	546	13.2	14.4	199.4	1014	342	5.05	1.05	25.13	508.1378705	0.35	calc.	climate	PA4-1	0.206636832	4.94550819	PA4	S. pulchra	SPh-PA	In water	3rd
45	21-Jul-17	12:27:47	7.1	2.7	409	9	546	12.9	14	199	1014	363	5.22	1.18	17.78	576.7420547	0.35	calc.	climate	PA4-2	0.20459753	3.082833973	PA4	S. pulchra	SPh-PA	In water	3rd
46	21-Jul-17	12:28:03	7.1	2.5	409	10	546	12.8	14	200	1014	355	4.94	1.09	20.37	576.7420547	0.35	calc.	climate	PA4-2	0.188992634	3.531908213	PA4	S. pulchra	SPh-PA	In water	3rd
47	21-Jul-17	12:28:34	7.1	2.5	409	8	546	12.8	14	201	1014	364	4.87	1.05	16.3	576.7420547	0.35	calc.	climate	PA4-2	0.182057124	2.826220122	PA4	S. pulchra	SPh-PA	In water	3rd
48	21-Jul-17	12:28:42	7.2	2.5	409	9	546	12.8	13.9	199.4	1014	360	4.99	1.11	18.55	576.7420547	0.35	calc.	climate	PA4-2	0.192460389	3.216342531	PA4	S. pulchra	SPh-PA	In water	3rd
49	21-Jul-17	12:28:58	7.1	2.5	409	9	546	12.8	14	199.4	1014	360	4.88	1.06	18.15	576.7420547	0.35	calc.	climate	PA4-2	0.183791002	3.146987436	PA4	S. pulchra	SPh-PA	In water	3rd
50	21-Jul-17	12:29:12	7.1	2.5	409	10	546	12.8	13.9	200.7	1014	354	4.82	1.05	20.47	576.7420547	0.35	calc.	climate	PA4-2	0.182057124	3.549246987	PA4	S. pulchra	SPh-PA	In water	3rd
51	21-Jul-17	12:30:19	7.1	2	409	7	546	12.6	13.8	198.4	1014	362	3.98	0.76	14	490.7355617	0.35	calc.	climate	PA4-3	0.154869559	2.852860296	PA4	S. pulchra	SPh-PA	In water	3rd
52	21-Jul-17	12:30:28	7.1	2.1	410	8	546	12.6	13.8	200.4	1014	361	4.12	0.81	15.05	490.7355617	0.35	calc.	climate	PA4-3	0.165058346	3.066824819	PA4	S. pulchra	SPh-PA	In water	3rd
53	21-Jul-17	12:30:36	7.1	2	410	10	546	12.6	13.7	199.4	1014	349	4.01	0.79	18.99	490.7355617	0.35	calc.	climate	PA4-3	0.160982831	3.869701216	PA4	S. pulchra	SPh-PA	In water	3rd
54	21-Jul-17	12:30:46	7.1	2	410	10	546	12.5	13.7	200.4	1014	348	4	0.78	19.25	490.7355617	0.35	calc.	climate	PA4-3	0.158945074	3.922682908	PA4	S. pulchra	SPh-PA	In water	3rd
55	21-Jul-17	12:31:05	7.2	2.1	410	10	546	12.6	13.7	199	1014	345	4.1	0.82	20.86	490.7355617	0.35	calc.	climate	PA4-3	0.167096103	4.250761842	PA4	S. pulchra	SPh-PA	In water	3rd
56	21-Jul-17	12:31:14	7.2	2	410	11	546	12.6	13.7	199.4	1014	336	3.93	0.77	22.77	490.7355617	0.35	calc.	climate	PA4-3	0.156907316	4.639973496	PA4	S. pulchra	SPh-PA	In water	3rd
76	25-Jul-17	10:22:04	12	2.8	380	14	546	22.7	23.9	200.7	1011	243	5.44	0.42	27.04	508.1378705	0.35	calc.	climate	PA4-1	0.082654733	5.321390428	PA4	S. pulchra	SPh-PA	Wet	4th
77	25-Jul-17	10:22:12	11.9	2.8	380	17	546	22.7	23.8	199	1011	217	5.56	0.44	33.82	508.1378705	0.35	calc.	climate	PA4-1	0.086590673	6.655673974	PA4	S. pulchra	SPh-PA	Wet	4th
78	25-Jul-17	10:22:23	12	3.2	380	17	546	22.6	23.8	201	1011	240	6.32	0.52	32.79	508.1378705	0.35	calc.	climate	PA4-1	0.102334431	6.452973081	PA4	S. pulchra	SPh-PA	Wet	4th
79	25-Jul-17	10:22:31	12.1	3.1	380	18	546	22.6	23.7	199	1011	224	6.05	0.5	35.81	508.1378705	0.35	calc.	climate	PA4-1	0.098398492	7.047299971	PA4	S. pulchra	SPh-PA	Wet	4th
80	25-Jul-17	10:22:41	12.1	3.4	380	18	546	22.5	23.7	200.4	1011	241	6.77	0.59	35.92	508.1378705	0.35	calc.	climate	PA4-1	0.11611022	7.068947639	PA4	S. pulchra	SPh-PA	Wet	4th
81	25-Jul-17	10:22:50	12	3.5	380	19	546	22.5	23.7	198.4	1011	238	6.89	0.61	37.38	508.1378705	0.35	calc.	climate	PA4-1	0.12004616	7.356271235	PA4	S. pulchra	SPh-PA	Wet	4th
82	25-Jul-17	10:25:10	11.9	2.3	378	13	546	21.1	22.2	200	1011	245	4.44	0.4	25.53	576.7420547	0.35	calc.	climate	PA4-2	0.069355095	4.426588939	PA4	S. pulchra	SPh-PA	Wet	4th
83	25-Jul-17	10:25:32	11.9	2.8	378	14	546	20.9	22	199.7	1011	263	5.44	0.55	28.22	576.7420547	0.35	calc.	climate	PA4-2	0.095363256	4.893001953	PA4	S. pulchra	SPh-PA	Wet	4th
84	25-Jul-17	10:25:41	11.9	2.8	378	14	546	20.9	22	198.7	1011	269	5.56	0.56	27.04	576.7420547	0.35	calc.	climate	PA4-2	0.097097133	4.688404423	PA4	S. pulchra	SPh-PA	Wet	4th
85	25-Jul-17	10:25:51	11.9	2.8	378	14	546	20.8	22	200.4	1011	268	5.42	0.56	27.2	576.7420547	0.35	calc.	climate	PA4-2	0.097097133	4.716146461	PA4	S. pulchra	SPh-PA	Wet	4th
86	25-Jul-17	10:28:08	12.6	1.8	381	13	546	20.8	21.9	199.7	1011	231	3.6	0.34	25.28	576.7420547	0.35	calc.	climate	PA4-2	0.058951831	4.383242005	PA4	S. pulchra	SPh-PA	Wet	4th
87	25-Jul-17	10:28:14	12.7	2	381	15	546	20.8	21.9	199.7	1011	226	4	0.39	29.52	490.7355617	0.35	calc.	climate	PA4-3	0.079472537	6.015459711	PA4	S. pulchra	SPh-PA	Wet	4th
88	25-Jul-17	10:28:20	12.7	2	381	15	546	20.8	21.9	199	1011	226	4	0.39	29.52	490.7355617	0.35	calc.	climate	PA4-3	0.079472537	6.015459711	PA4	S. pulchra	SPh-PA	Wet	4th
89	25-Jul-17	10:28:27	12.7	2.3	381	15	546	20.8	22	201	1011	237	4.45	0.45	30.47	490.7355617	0.35	calc.	climate	PA4-3	0.091699081	6.209046659	PA4	S. pulchra	SPh-PA	Wet	4th
90	25-Jul-17	10:28:32	12.7	2.3	381	16	546	20.8	21.9	198.7	1011	241	4.58	0.48	31.06	490.7355617	0.35	calc.	climate	PA4-3	0.097812353	6.329274343	PA4	S. pulchra	SPh-PA	Wet	4th
91	25-Jul-17	10:28:43	12.7	2.4	381	16	546	20.9	22	198.7	1011	244	4.73	0.49	31.13	490.7355617	0.35	calc.	climate	PA4-3	0.09985011	6.343538645	PA4	S. pulchra	SPh-PA	Wet	4th
92	25-Jul-17	10:28:51	12.7	2.5	381	16	546	20.9	22	198.7	1011	246	4.95	0.52	32.09	490.7355617	0.35	calc.	climate	PA4-3	0.105963382	6.539163351	PA4	S. pulchra	SPh-PA	Wet	4th
93	27-Jul-17	12:06:55	12	5.2	379	17	546	22.8	23.9	200.7	1000	290	10.34	1.15	34.67	508.1378705	0.35	calc.	climate	PA4-1	0.226316531	6.82295141	PA4	S. pulchra	SPh-PA	Wet	5th
94	27-Jul-17	12:07:03	12.2	5.4	379	20	546	22.8	23.9	199.4	1000	281	10.68	1.23	40.14	508.1378705	0.35	calc.	climate	PA4-1	0.242060289	7.899430908	PA4	S. pulchra	SPh-PA	Wet	5th
95	27-Jul-17	12:07:13	12	5.3	379	20	546	22.8	24	198.7	1000	280	10.6	1.22	40.34	508.1378705	0.35	calc.	climate	PA4-1	0.24009232	7.938790305	PA4	S. pulchra	SPh-PA	Wet	5th
96	27-Jul-17	12:07:22	12.1	5.6	379	22	546	22.8	24	199	1000	277	11.05	1.31	43.74	508.1378705	0.35	calc.	climate	PA4-1	0.257804048	8.607900048	PA4	S. pulchra	SPh-PA	Wet	5th
97	27-Jul-17	12:07:32	12	5.6	379	22	546	22.8	24	200	1000	277	11.12	1.33	44.09	508.1378705	0.35	calc.	climate	PA4-1	0.261739988	8.676778992	PA4	S. pulchra	SPh-PA	Wet	5th
98	27-Jul-17	12:07:41	12.1	5.8	379	23	546	22.9	24	199.7	1000	273	11.44	1.38	46.65	508.1378705	0.35	calc.	climate	PA4-1	0.271579837	9.18057927	PA4	S. pulchra	SPh-PA	Wet	5th
99	27-Jul-17	12:07:51	12	5.7	379	23	546	22.9	24	199.7	1000	273	11.36	1.39	46.89	508.1378705	0.35	calc.	climate	PA4-1	0.273547807	9.227810546	PA4	S. pulchra	SPh-PA	Wet	5th
100	27-Jul-17	12:08:00	12	6.1	379	25	546	22.9	24	199	1000	275	12.09	1.58	49.1	508.1378705	0.35	calc.	climate	PA4-1	0.310939234	9.662731879	PA4	S. pulchra	SPh-PA	Wet	5th
101	27-Jul-17	12:10:05	12	6.6	379	17	546	23.4	24.5	200.7	1000	307	13.1	1.75	34.77	576.7420547	0.35	calc.	climate	PA4-2	0.303428541	6.028691634	PA4	S. pulchra	SPh-PA	Wet	5th
102	27-Jul-17	12:10:13	12.1	6.6	379	18	546	23.4	24.5	198	1000	303	13.14	1.75	36.63	576.7420547	0.35	calc.	climate	PA4-2	0.303428541	6.351192826	PA4	S. pulchra	SPh-PA	Wet	5th
103	27-Jul-17	12:10:23	12.1	6.8	379	19	546	23.5	24.5	199	1000	305	13.47	1.88	37.21	576.7420547	0.35	calc.	climate	PA4-2	0.325968947	6.451757713	PA4	S. pulchra	SPh-PA	Wet	5th
104	27-Jul-17	12:10:32	12.2	6.9	379	19	546	23.5	24.6	198.7	1000	302	13.71	1.85	38.45	576.7420547	0.35	calc.	climate	PA4-2	0.320767314	6.666758508	PA4	S. pulchra	SPh-PA	Wet	5th
105	27-Jul-17	12:10:42	12.2	6.9	379	19	546	23.5	24.6	199	1000	304	13.78	1.93	38.19	576.7420547	0.35	calc.	climate	PA4-2	0.334638333	6.621677696	PA4	S. pulchra	SPh-PA	Wet	5th
106	27-Jul-17	12:10:50	12.2	7	379	20	546	23.5	24.7	198.7	1000	301	13.96	1.93	39.41	576.7420547	0.35	calc.	climate	PA4-2	0.334638333	6.833210736	PA4	S. pulchra	SPh-PA	Wet	5th
107	27-Jul-17	12:11:02	12.3	7.1	379	20	546	23.6	24.8	199.4	1000	302	14.1	1.97	39.6	576.7420547	0.35	calc.	climate	PA4-2	0.341573843	6.866154406	PA4	S. pulchra	SPh-PA	Wet	5th
108	27-Jul-17	12:11:10	12.3	7.1	379	20	546	23.6	24.8	199.4	1000	301	14.21	1.99	39.98	576.7420547	0.35	calc.	climate	PA4-2	0.345041598	6.932041746	PA4	S. pulchra	SPh-PA	Wet	5th
109	27-Jul-17	12:11:21	12.2	7.2	379	20	546	23.7	24.8	199.7	1000	303	14.33	2.07	39.94	576.7420547	0.35	calc.	climate	PA4-2	0.358912617	6.925106237	PA4	S. pulchra	SPh-PA	Wet	5th
110	27-Jul-17	12:13:01	12.3	5.4	379	17	546	23.7	24.8	199.4	1000	288	10.67	1.06	33.67	490.7355617	0.35	calc.	climate	PA4-3	0.21600228	6.861129013	PA4	S. pulchra	SPh-PA	Wet	5th
111	27-Jul-17	12:13:22	12.2	5.9	378	21	546	23.8	24.9	199	1000	279	11.79	1.26	41.15	490.7355617	0.35	calc.	climate	PA4-3	0.256757427	8.385371514	PA4	S. pulchra	SPh-PA	Wet	5th
112	27-Jul-17	12:13:30	12.3	5.9	378	21	546	23.8	24.9	199.4	1000	279	11.79	1.26	41.15	490.7355617	0.35	calc.	climate	PA4-3	0.256757427	8.385371514	PA4	S. pulchra	SPh-PA	Wet	5th
113	27-Jul-17	12:13:43	12.4	6.2	378	23	546	23.8	25	199	1000	274	12.27	1.36	45.27	490.7355617	0.35	calc.	climate	PA4-3	0.277135	9.224927544	PA4	S. pulchra	SPh-PA	Wet	5th
114	27-Jul-17	12:13:53	12.4	6.1	378	23	546	23.8	25	199.7	1000	271	12.15	1.33	46.15	490.7355617	0.35	calc.	climate	PA4-3	0.271021728	9.404250191	PA4	S. pulchra	SPh-PA	Wet	5th
115	27-Jul-17	12:14:12	12.3	6.2	378	24	546	23.9	25	199.4	1000	269	12.39	1.4	48.21	490.7355617	0.35	calc.	climate	PA4-3	0.28528603	9.824028206	PA4	S. pulchra	SPh-PA	Wet	5th
116	27-Jul-17	12:14:22	12.2	6.4	378	25	546	23.9	25	200	1000	269	12.71	1.45	49.19	490.7355617	0.35	calc.	climate	PA4-3	0.295474816	10.02372843	PA4	S. pulchra	SPh-PA	Wet	5th
117	27-Jul-17	12:14:32	12.4	6.4	379	25	546	23.9	25.1	200.7	1000	268	12.7	1.44	49.9	490.7355617	0.35	calc.	climate	PA4-3	0.293437059	10.1684092	PA4	S. pulchra	SPh-PA	Wet	5th
1	15-Jul-17	15:39:49	8.2	1.4	474	31	546	8.3	9.4	199.7	1019	370	2.8	2.46	62.83	1918.341525	0.35	calc.	climate	PB1-1	0.128235769	3.275224937	PB1	S. richardsonii	SPh-PB	In water	1st
2	15-Jul-17	15:40:04	8.3	1.5	473	30	546	8.3	9.5	199.7	1019	378	2.92	2.75	60.09	1918.341525	0.35	calc.	climate	PB1-1	0.143352993	3.132393227	PB1	S. richardsonii	SPh-PB	In water	1st
3	15-Jul-17	15:40:15	8.3	1.6	473	30	546	8.4	9.5	200	1019	383	3.08	3.16	59.75	1918.341525	0.35	calc.	climate	PB1-1	0.164725622	3.114669585	PB1	S. richardsonii	SPh-PB	In water	1st
4	15-Jul-17	15:40:30	8.3	1.6	473	30	546	8.4	9.5	199	1019	385	3.07	3.26	58.97	1918.341525	0.35	calc.	climate	PB1-1	0.169938458	3.074009463	PB1	S. richardsonii	SPh-PB	In water	1st
5	15-Jul-17	15:40:40	8.3	1.6	472	29	546	8.4	9.6	198.4	1019	390	3.18	3.53	56.65	1918.341525	0.35	calc.	climate	PB1-1	0.184013115	2.953071665	PB1	S. richardsonii	SPh-PB	In water	1st
6	15-Jul-17	15:40:52	8.4	1.7	472	28	546	8.4	9.6	200.7	1019	392	3.24	3.73	55.58	1918.341525	0.35	calc.	climate	PB1-1	0.194438787	2.897294318	PB1	S. richardsonii	SPh-PB	In water	1st
7	15-Jul-17	15:42:38	8.4	1.5	470	34	546	8.5	9.7	199	1019	359	3	2.61	68.64	1626.271329	0.35	calc.	climate	PB1-2	0.160489824	4.220697911	PB1	S. richardsonii	SPh-PB	In water	1st
8	15-Jul-17	15:42:47	8.3	1.6	469	34	546	8.5	9.7	200.4	1019	369	3.15	3.22	66.99	1626.271329	0.35	calc.	climate	PB1-2	0.19799894	4.119238826	PB1	S. richardsonii	SPh-PB	In water	1st
9	15-Jul-17	15:42:56	8.4	1.7	469	35	546	8.5	9.7	199.7	1019	370	3.36	3.79	69.44	1626.271329	0.35	calc.	climate	PB1-2	0.233048442	4.269890194	PB1	S. richardsonii	SPh-PB	In water	1st
10	15-Jul-17	15:43:05	8.3	1.8	468	34	546	8.5	9.7	201	1019	377	3.49	4.72	67.62	1626.271329	0.35	calc.	climate	PB1-2	0.290234472	4.15797775	PB1	S. richardsonii	SPh-PB	In water	1st
11	15-Jul-17	15:43:14	8.3	1.8	468	35	546	8.6	9.7	199	1019	377	3.53	5.03	69.11	1626.271329	0.35	calc.	climate	PB1-2	0.309296482	4.249598377	PB1	S. richardsonii	SPh-PB	In water	1st
12	15-Jul-17	15:43:25	8.3	1.9	468	35	546	8.6	9.7	200.7	1019	382	3.71	6.69	69	1626.271329	0.35	calc.	climate	PB1-2	0.411370469	4.242834438	PB1	S. richardsonii	SPh-PB	In water	1st
14	15-Jul-17	15:44:53	8.2	1.6	466	36	546	8.7	9.8	199	1019	352	3.16	2.72	72.01	1501.665054	0.35	calc.	climate	PB1-3	0.18113227	4.795343664	PB1	S. richardsonii	SPh-PB	In water	1st
15	15-Jul-17	15:45:03	8.3	1.7	466	36	546	8.8	9.9	198.7	1019	358	3.27	3.01	70.73	1501.665054	0.35	calc.	climate	PB1-3	0.200444166	4.710104949	PB1	S. richardsonii	SPh-PB	In water	1st
16	15-Jul-17	15:45:15	8.3	1.7	466	38	546	8.7	9.9	198	1019	352	3.34	3.19	75.99	1501.665054	0.35	calc.	climate	PB1-3	0.212430861	5.060382794	PB1	S. richardsonii	SPh-PB	In water	1st
17	15-Jul-17	15:45:20	8.3	1.8	465	37	546	8.8	9.9	200.7	1019	359	3.47	3.68	74.17	1501.665054	0.35	calc.	climate	PB1-3	0.245061307	4.939183996	PB1	S. richardsonii	SPh-PB	In water	1st
18	15-Jul-17	15:45:29	8.3	1.8	465	39	546	8.8	9.9	199.4	1019	357	3.56	4.01	77.54	1501.665054	0.35	calc.	climate	PB1-3	0.267036913	5.163601551	PB1	S. richardsonii	SPh-PB	In water	1st
19	15-Jul-17	15:45:39	8.3	1.8	465	39	546	8.8	10	201	1019	357	3.6	4.02	77.7	1501.665054	0.35	calc.	climate	PB1-3	0.26770284	5.174256391	PB1	S. richardsonii	SPh-PB	In water	1st
20	15-Jul-17	15:45:47	8.2	1.9	465	41	546	8.8	9.9	199.7	1019	359	3.74	5.17	81.55	1501.665054	0.35	calc.	climate	PB1-3	0.344284499	5.430638464	PB1	S. richardsonii	SPh-PB	In water	1st
21	15-Jul-17	15:45:56	8.2	1.9	465	40	546	8.8	9.9	198.4	1019	358	3.71	4.81	80.28	1501.665054	0.35	calc.	climate	PB1-3	0.32031111	5.346065676	PB1	S. richardsonii	SPh-PB	In water	1st
22	15-Jul-17	15:46:06	8.3	1.9	465	42	546	8.9	10	200.7	1019	352	3.79	4.69	84.69	1501.665054	0.35	calc.	climate	PB1-3	0.31231998	5.639739687	PB1	S. richardsonii	SPh-PB	In water	1st
23	15-Jul-17	15:46:09	8.3	1.9	465	42	546	8.9	10	199.7	1020	352	3.79	4.69	84.69	1501.665054	0.35	calc.	climate	PB1-3	0.31231998	5.639739687	PB1	S. richardsonii	SPh-PB	In water	1st
24	18-Jul-17	11:18:02	10.5	3.7	423	29	546	18.9	20	200.4	1005	277	7.35	1.1	57.72	1918.341525	0.35	calc.	climate	PB1-1	0.057341197	3.008849011	PB1	S. richardsonii	SPh-PB	In water	2nd
25	18-Jul-17	11:18:18	10.7	3.9	420	27	546	18.9	20.1	200.7	1005	290	7.65	1.2	54.1	1918.341525	0.35	calc.	climate	PB1-1	0.062554033	2.820144343	PB1	S. richardsonii	SPh-PB	In water	2nd
26	18-Jul-17	11:18:27	10.7	3.6	420	29	546	18.9	20	199.4	1004	278	7.23	1.13	57.72	1918.341525	0.35	calc.	climate	PB1-1	0.058905048	3.008849011	PB1	S. richardsonii	SPh-PB	In water	2nd
27	18-Jul-17	11:18:38	10.8	3.9	420	28	546	18.9	20.1	200.7	1005	286	7.65	1.22	56.29	1918.341525	0.35	calc.	climate	PB1-1	0.063596601	2.934305455	PB1	S. richardsonii	SPh-PB	In water	2nd
28	18-Jul-17	11:18:48	10.8	3.8	420	29	546	18.9	20.1	199.7	1005	281	7.62	1.22	58.7	1918.341525	0.35	calc.	climate	PB1-1	0.063596601	3.059934805	PB1	S. richardsonii	SPh-PB	In water	2nd
29	18-Jul-17	11:19:00	10.9	3.8	420	29	546	19	20.2	199	1005	279	7.6	1.19	58.5	1918.341525	0.35	calc.	climate	PB1-1	0.06203275	3.049509133	PB1	S. richardsonii	SPh-PB	In water	2nd
30	18-Jul-17	11:19:13	10.9	4	419	29	546	19.1	20.2	198.7	1005	283	7.82	1.26	58.32	1918.341525	0.35	calc.	climate	PB1-1	0.065681735	3.040126028	PB1	S. richardsonii	SPh-PB	In water	2nd
31	18-Jul-17	11:19:25	10.9	4	419	31	546	19	20.3	198.7	1005	280	8.03	1.3	60.89	1918.341525	0.35	calc.	climate	PB1-1	0.06776687	3.174095916	PB1	S. richardsonii	SPh-PB	In water	2nd
32	18-Jul-17	11:19:36	10.8	4.1	419	31	546	19.1	20.3	201	1005	284	8.24	1.39	61.02	1918.341525	0.35	calc.	climate	PB1-1	0.072458422	3.180872603	PB1	S. richardsonii	SPh-PB	In water	2nd
33	18-Jul-17	11:19:49	10.9	4.2	419	30	546	19.1	20.3	199.7	1005	286	8.3	1.4	60.36	1918.341525	0.35	calc.	climate	PB1-1	0.072979706	3.146467885	PB1	S. richardsonii	SPh-PB	In water	2nd
34	18-Jul-17	11:20:01	10.9	4.1	418	31	546	19.2	20.3	198.4	1005	279	8.03	1.33	61.65	1918.341525	0.35	calc.	climate	PB1-1	0.06933072	3.213713471	PB1	S. richardsonii	SPh-PB	In water	2nd
35	18-Jul-17	11:22:53	10.7	4.6	416	43	546	19.9	21	199	1005	231	9.06	1.39	84.91	1626.271329	0.35	calc.	climate	PB1-2	0.085471592	5.221145973	PB1	S. richardsonii	SPh-PB	In water	2nd
36	18-Jul-17	11:23:11	10.7	4.9	416	45	546	19.9	21	199.4	1005	232	9.71	1.57	89.78	1626.271329	0.35	calc.	climate	PB1-2	0.096539856	5.520603998	PB1	S. richardsonii	SPh-PB	In water	2nd
37	18-Jul-17	11:23:22	10.7	5	416	45	546	19.9	21.1	200	1005	238	9.87	1.66	89.49	1626.271329	0.35	calc.	climate	PB1-2	0.102073988	5.502771796	PB1	S. richardsonii	SPh-PB	In water	2nd
38	18-Jul-17	11:23:32	10.8	5.2	416	46	546	19.9	21.2	199	1005	241	10.22	1.79	91.06	1626.271329	0.35	calc.	climate	PB1-2	0.110067734	5.599311652	PB1	S. richardsonii	SPh-PB	In water	2nd
39	18-Jul-17	11:23:41	10.7	5.2	415	45	546	20	21.2	199.7	1005	245	10.3	1.85	90.05	1626.271329	0.35	calc.	climate	PB1-2	0.113757155	5.537206394	PB1	S. richardsonii	SPh-PB	In water	2nd
40	18-Jul-17	11:23:50	10.8	5.3	415	46	546	20	21.2	199	1005	246	10.43	1.9	90.72	1626.271329	0.35	calc.	climate	PB1-2	0.116831673	5.578404931	PB1	S. richardsonii	SPh-PB	In water	2nd
41	18-Jul-17	11:28:39	10	5	412	41	546	19.7	20.9	199	1005	238	9.89	1.49	82.39	1501.665054	0.35	calc.	climate	PB1-3	0.099223192	5.486576371	PB1	S. richardsonii	SPh-PB	In water	2nd
42	18-Jul-17	11:29:35	9.2	4.9	411	43	546	19.6	20.7	199.4	1005	230	9.64	1.46	85.06	1501.665054	0.35	calc.	climate	PB1-3	0.09722541	5.664379004	PB1	S. richardsonii	SPh-PB	In water	2nd
43	18-Jul-17	11:29:47	9	5.3	412	43	546	19.6	20.7	201.7	1005	240	10.47	1.65	85.35	1501.665054	0.35	calc.	climate	PB1-3	0.109878031	5.6836909	PB1	S. richardsonii	SPh-PB	In water	2nd
44	18-Jul-17	11:30:02	9	5.5	412	43	546	19.6	20.7	201.7	1005	244	10.82	1.75	86.07	1501.665054	0.35	calc.	climate	PB1-3	0.116537306	5.731637677	PB1	S. richardsonii	SPh-PB	In water	2nd
45	18-Jul-17	11:30:11	9	5.4	412	44	546	19.6	20.7	199	1005	239	10.78	1.71	87.38	1501.665054	0.35	calc.	climate	PB1-3	0.113873596	5.818874175	PB1	S. richardsonii	SPh-PB	In water	2nd
46	18-Jul-17	11:30:30	9.1	5.4	412	44	546	19.5	20.7	199	1005	239	10.66	1.71	87.6	1501.665054	0.35	calc.	climate	PB1-3	0.113873596	5.833524579	PB1	S. richardsonii	SPh-PB	In water	2nd
47	21-Jul-17	11:40:19	7.4	3.9	425	32	546	13.1	14.3	200.7	1013	330	7.71	3.39	63.92	1918.341525	0.35	calc.	climate	PB1-1	0.176715145	3.332044851	PB1	S. richardsonii	SPh-PB	Wet	3rd
48	21-Jul-17	11:40:30	7.4	4	425	38	546	13.2	14.3	199.4	1013	314	7.84	3.6	76.09	1918.341525	0.35	calc.	climate	PB1-1	0.1876621	3.966447007	PB1	S. richardsonii	SPh-PB	Wet	3rd
49	21-Jul-17	11:40:51	7.4	4.1	424	42	546	13.2	14.3	199	1014	310	8.16	4.34	82.95	1918.341525	0.35	calc.	climate	PB1-1	0.226237088	4.324047565	PB1	S. richardsonii	SPh-PB	Wet	3rd
50	21-Jul-17	11:41:05	7.5	4.3	423	44	546	13.2	14.4	199.7	1013	307	8.46	4.94	87.62	1918.341525	0.35	calc.	climate	PB1-1	0.257514105	4.567487012	PB1	S. richardsonii	SPh-PB	Wet	3rd
51	21-Jul-17	11:41:16	7.4	4.3	422	42	546	13.2	14.4	201	1013	312	8.55	5.41	84.32	1918.341525	0.35	calc.	climate	PB1-1	0.282014434	4.39546342	PB1	S. richardsonii	SPh-PB	Wet	3rd
52	21-Jul-17	11:41:34	7.5	4.5	422	44	546	13.2	14.4	198.4	1013	310	8.71	6.08	87.93	1918.341525	0.35	calc.	climate	PB1-1	0.316940436	4.583646804	PB1	S. richardsonii	SPh-PB	Wet	3rd
53	21-Jul-17	11:43:09	7.7	4	419	32	546	13.5	14.7	200.7	1013	323	7.82	3.43	64.33	1626.271329	0.35	calc.	climate	PB1-2	0.210911915	3.955674484	PB1	S. richardsonii	SPh-PB	Wet	3rd
54	21-Jul-17	11:43:18	7.8	4.2	419	39	546	13.5	14.7	199.4	1013	309	8.29	4.17	78.36	1626.271329	0.35	calc.	climate	PB1-2	0.256414777	4.818384154	PB1	S. richardsonii	SPh-PB	Wet	3rd
55	21-Jul-17	11:43:29	7.7	4.3	419	39	546	13.6	14.7	199.7	1013	314	8.39	4.77	77.97	1626.271329	0.35	calc.	climate	PB1-2	0.293308989	4.794402915	PB1	S. richardsonii	SPh-PB	Wet	3rd
56	21-Jul-17	11:43:38	7.7	4.4	419	44	546	13.5	14.7	199.7	1013	304	8.66	5.07	86.75	1626.271329	0.35	calc.	climate	PB1-2	0.311756096	5.334288225	PB1	S. richardsonii	SPh-PB	Wet	3rd
57	21-Jul-17	11:43:48	7.7	4.6	419	43	546	13.6	14.8	200.4	1013	309	9.02	6.11	86.18	1626.271329	0.35	calc.	climate	PB1-2	0.375706064	5.299238723	PB1	S. richardsonii	SPh-PB	Wet	3rd
58	21-Jul-17	11:43:57	7.6	4.5	419	47	546	13.6	14.7	199.7	1013	300	8.81	5.97	93.19	1626.271329	0.35	calc.	climate	PB1-2	0.367097414	5.730286106	PB1	S. richardsonii	SPh-PB	Wet	3rd
59	21-Jul-17	11:45:51	7.6	4.7	417	40	546	13.7	14.9	199.4	1014	320	9.28	7.14	78.93	1501.665054	0.35	calc.	climate	PB1-3	0.475472209	5.256165469	PB1	S. richardsonii	SPh-PB	Wet	3rd
60	21-Jul-17	11:46:05	7.6	4.7	416	39	546	13.7	14.8	200.4	1014	322	9.28	7.71	77.32	1501.665054	0.35	calc.	climate	PB1-3	0.513430074	5.148951147	PB1	S. richardsonii	SPh-PB	Wet	3rd
61	21-Jul-17	11:46:11	7.7	4.8	416	44	546	13.7	14.9	198.7	1013	312	9.44	8.35	86.94	1501.665054	0.35	calc.	climate	PB1-3	0.556049432	5.789573367	PB1	S. richardsonii	SPh-PB	Wet	3rd
62	21-Jul-17	11:46:47	7.6	5	416	49	546	13.7	14.9	199.4	1013	306	9.91	under	97.07	1501.665054	0.35	calc.	climate	PB1-3		6.464157887	PB1	S. richardsonii	SPh-PB	Wet	3rd
63	21-Jul-17	11:46:56	7.8	5.2	415	48	546	13.7	14.9	199	1013	310	10.14	under	95.69	1501.665054	0.35	calc.	climate	PB1-3		6.372259897	PB1	S. richardsonii	SPh-PB	Wet	3rd
64	21-Jul-17	11:47:05	7.7	5.1	415	50	546	13.6	14.8	199.7	1013	305	9.97	under	100.52	1501.665054	0.35	calc.	climate	PB1-3		6.693902862	PB1	S. richardsonii	SPh-PB	Wet	3rd
80	25-Jul-17	9:48:43	13.8	7.2	389	41	546	22.5	23.6	201	1011	275	14.13	4.14	80.82	1918.341525	0.35	calc.	climate	PB1-1	0.215811416	4.213014156	PB1	S. richardsonii	SPh-PB	Wet	4th
81	25-Jul-17	9:48:52	14	7	389	45	546	22.6	23.6	199.4	1011	262	13.72	3.91	88.9	1918.341525	0.35	calc.	climate	PB1-1	0.203821892	4.634211315	PB1	S. richardsonii	SPh-PB	Wet	4th
82	25-Jul-17	9:49:02	14.3	6.8	388	44	546	22.6	23.8	200.7	1011	261	13.47	3.7	87.62	1918.341525	0.35	calc.	climate	PB1-1	0.192874937	4.567487012	PB1	S. richardsonii	SPh-PB	Wet	4th
83	25-Jul-17	9:49:11	14.6	6.8	388	48	546	22.7	23.8	199	1011	254	13.47	3.96	94.8	1918.341525	0.35	calc.	climate	PB1-1	0.206428311	4.941768646	PB1	S. richardsonii	SPh-PB	Wet	4th
84	25-Jul-17	9:49:21	14.9	6.7	387	46	546	22.7	23.9	199.4	1011	255	13.22	3.75	91.01	1918.341525	0.35	calc.	climate	PB1-1	0.195481355	4.744202157	PB1	S. richardsonii	SPh-PB	Wet	4th
85	25-Jul-17	9:51:40	12.6	6.9	388	38	546	22.1	23.2	199	1011	273	13.67	3.37	76.31	1626.271329	0.35	calc.	climate	PB1-2	0.207222494	4.692328927	PB1	S. richardsonii	SPh-PB	Wet	4th
86	25-Jul-17	9:51:47	12.5	7	388	41	546	21.9	23.3	199	1011	264	13.69	3.22	81.47	1626.271329	0.35	calc.	climate	PB1-2	0.19799894	5.009619155	PB1	S. richardsonii	SPh-PB	Wet	4th
87	25-Jul-17	9:51:54	12.4	7.2	388	41	546	21.8	23	198.7	1011	272	14.14	4	81.05	1626.271329	0.35	calc.	climate	PB1-2	0.245961417	4.983793206	PB1	S. richardsonii	SPh-PB	Wet	4th
88	25-Jul-17	9:52:04	12.2	7.1	388	42	546	21.8	22.9	198.7	1011	266	14.02	3.91	84.61	1626.271329	0.35	calc.	climate	PB1-2	0.240427285	5.202698867	PB1	S. richardsonii	SPh-PB	Wet	4th
89	25-Jul-17	9:52:13	12.2	7.2	388	43	546	21.7	22.9	200	1011	267	14.34	4.08	85.59	1626.271329	0.35	calc.	climate	PB1-2	0.250880645	5.262959414	PB1	S. richardsonii	SPh-PB	Wet	4th
90	25-Jul-17	9:52:22	12.1	7.2	388	44	546	21.7	22.9	199	1011	265	14.26	4.01	86.75	1626.271329	0.35	calc.	climate	PB1-2	0.24657632	5.334288225	PB1	S. richardsonii	SPh-PB	Wet	4th
91	25-Jul-17	9:54:19	12.5	6.7	387	54	546	22.1	23.3	198.7	1011	212	13.25	2.69	108.4	1501.665054	0.35	calc.	climate	PB1-3	0.179134488	7.218653703	PB1	S. richardsonii	SPh-PB	Wet	4th
92	25-Jul-17	9:54:28	12.4	6.8	387	54	546	22.2	23.4	201.4	1011	216	13.39	2.81	107.31	1501.665054	0.35	calc.	climate	PB1-3	0.187125617	7.14606761	PB1	S. richardsonii	SPh-PB	Wet	4th
93	25-Jul-17	9:54:35	12.4	7.1	387	58	546	22.2	23.4	198.4	1011	211	13.87	3.14	115.2	1501.665054	0.35	calc.	climate	PB1-3	0.209101224	7.671484378	PB1	S. richardsonii	SPh-PB	Wet	4th
94	25-Jul-17	9:54:45	12.5	7.3	387	59	546	22.2	23.4	198.7	1011	216	14.39	3.49	116.54	1501.665054	0.35	calc.	climate	PB1-3	0.232408685	7.760718658	PB1	S. richardsonii	SPh-PB	Wet	4th
95	25-Jul-17	9:54:54	12.3	7.4	387	62	546	22.3	23.4	199	1011	213	14.59	3.9	122.74	1501.665054	0.35	calc.	climate	PB1-3	0.259711711	8.173593686	PB1	S. richardsonii	SPh-PB	Wet	4th
96	25-Jul-17	9:55:04	12.3	7.6	387	61	546	22.3	23.4	198.7	1011	216	14.91	4.04	121.18	1501.665054	0.35	calc.	climate	PB1-3	0.269034695	8.069709001	PB1	S. richardsonii	SPh-PB	Wet	4th
98	27-Jul-17	11:39:26	11.7	8.7	381	53	546	23.6	24.8	198.7	999	225	17.29	3.52	105.09	1918.341525	0.35	calc.	climate	PB1-1	0.183491832	5.478169483	PB1	S. richardsonii	SPh-PB	Wet	5th
99	27-Jul-17	11:39:36	11.7	9.1	381	52	546	23.6	24.8	199.7	1000	234	18.18	4.31	104.83	1918.341525	0.35	calc.	climate	PB1-1	0.224673237	5.46461611	PB1	S. richardsonii	SPh-PB	Wet	5th
100	27-Jul-17	11:39:45	11.5	9.1	381	57	546	23.6	24.7	200	999	224	18.09	4.35	112.64	1918.341525	0.35	calc.	climate	PB1-1	0.226758371	5.871738611	PB1	S. richardsonii	SPh-PB	Wet	5th
101	27-Jul-17	11:39:55	11.6	9.4	381	57	546	23.6	24.7	198.4	1000	229	18.61	4.87	112.8	1918.341525	0.35	calc.	climate	PB1-1	0.253865119	5.880079149	PB1	S. richardsonii	SPh-PB	Wet	5th
102	27-Jul-17	11:40:04	11.6	9.4	381	59	546	23.5	24.7	198.7	999	226	18.77	5.3	117.61	1918.341525	0.35	calc.	climate	PB1-1	0.276280315	6.130816566	PB1	S. richardsonii	SPh-PB	Wet	5th
103	27-Jul-17	11:40:14	11.6	9.6	380	59	546	23.4	24.6	199.4	999	229	19.1	5.82	117.24	1918.341525	0.35	calc.	climate	PB1-1	0.303387062	6.111529073	PB1	S. richardsonii	SPh-PB	Wet	5th
104	27-Jul-17	11:41:50	11.5	8.4	380	36	546	23	24.1	200.7	1000	273	16.64	3.63	71.83	1626.271329	0.35	calc.	climate	PB1-2	0.223209986	4.416852141	PB1	S. richardsonii	SPh-PB	Wet	5th
105	27-Jul-17	11:41:58	11.5	8.5	380	42	546	22.9	24	198.4	1000	262	16.84	4.12	82.48	1626.271329	0.35	calc.	climate	PB1-2	0.253340259	5.071724413	PB1	S. richardsonii	SPh-PB	Wet	5th
106	27-Jul-17	11:42:09	11.5	8.6	379	41	546	22.8	24	199.4	1000	265	17.14	4.4	81.67	1626.271329	0.35	calc.	climate	PB1-2	0.270557558	5.021917226	PB1	S. richardsonii	SPh-PB	Wet	5th
107	27-Jul-17	11:42:18	11.5	8.7	379	44	546	22.8	24	198.7	1000	260	17.32	4.84	87.79	1626.271329	0.35	calc.	climate	PB1-2	0.297613314	5.398238193	PB1	S. richardsonii	SPh-PB	Wet	5th
108	27-Jul-17	11:42:27	11.5	8.7	379	44	546	22.8	23.9	199	1000	262	17.4	5.27	88.04	1626.271329	0.35	calc.	climate	PB1-2	0.324054167	5.413610782	PB1	S. richardsonii	SPh-PB	Wet	5th
109	27-Jul-17	11:42:37	11.5	8.8	379	47	546	22.8	23.9	199.7	1000	253	17.55	5.2	94.72	1626.271329	0.35	calc.	climate	PB1-2	0.319749842	5.824366348	PB1	S. richardsonii	SPh-PB	Wet	5th
110	27-Jul-17	11:44:03	11.9	7.6	379	41	546	23	24.2	201	1000	245	15.07	2.71	81.64	1501.665054	0.35	calc.	climate	PB1-3	0.180466343	5.436631811	PB1	S. richardsonii	SPh-PB	Wet	5th
111	27-Jul-17	11:44:12	11.9	7.8	379	49	546	23	24.2	200.4	1000	227	15.69	3.1	98.41	1501.665054	0.35	calc.	climate	PB1-3	0.206437514	6.553392167	PB1	S. richardsonii	SPh-PB	Wet	5th
112	27-Jul-17	11:44:21	11.9	8.1	379	49	546	23.1	24.2	199	999	234	16.22	3.48	97.61	1501.665054	0.35	calc.	climate	PB1-3	0.231742757	6.50011797	PB1	S. richardsonii	SPh-PB	Wet	5th
113	27-Jul-17	11:44:24	11.8	8.1	379	49	546	23	24.2	200.7	1000	234	16.22	3.48	97.61	1501.665054	0.35	calc.	climate	PB1-3	0.231742757	6.50011797	PB1	S. richardsonii	SPh-PB	Wet	5th
114	27-Jul-17	11:44:31	11.8	8.3	379	53	546	23	24.2	198.7	1000	225	16.36	3.64	104.82	1501.665054	0.35	calc.	climate	PB1-3	0.242397597	6.980251671	PB1	S. richardsonii	SPh-PB	Wet	5th
115	27-Jul-17	11:44:38	11.8	8.4	379	53	546	23.2	24.3	199	1000	226	16.76	3.82	106.38	1501.665054	0.35	calc.	climate	PB1-3	0.254384291	7.084136356	PB1	S. richardsonii	SPh-PB	Wet	5th
116	27-Jul-17	11:44:45	11.9	8.4	379	53	546	23.1	24.3	198.7	1000	226	16.76	3.82	106.38	1501.665054	0.35	calc.	climate	PB1-3	0.254384291	7.084136356	PB1	S. richardsonii	SPh-PB	Wet	5th
117	27-Jul-17	11:44:50	11.9	8.5	379	57	546	23.2	24.2	199.4	1000	220	17.02	4.24	114.3	1501.665054	0.35	calc.	climate	PB1-3	0.282353244	7.611550907	PB1	S. richardsonii	SPh-PB	Wet	5th
118	27-Jul-17	11:45:00	11.9	8.5	379	57	546	23.1	24.3	199.4	999	219	16.97	4.1	113.64	1501.665054	0.35	calc.	climate	PB1-3	0.27303026	7.567599694	PB1	S. richardsonii	SPh-PB	Wet	5th
119	27-Jul-17	11:45:19	12	8.5	378	57	546	23.1	24.3	200.4	1000	221	16.93	4.18	112.61	1501.665054	0.35	calc.	climate	PB1-3	0.27835768	7.499009165	PB1	S. richardsonii	SPh-PB	Wet	5th
120	27-Jul-17	11:45:29	12.1	8.6	378	56	546	23.2	24.3	199	1000	225	17.1	4.48	111.78	1501.665054	0.35	calc.	climate	PB1-3	0.298335504	7.443737186	PB1	S. richardsonii	SPh-PB	Wet	5th
1	15-Jul-17	15:47:52	8.2	1.6	462	29	546	8.9	10.1	200.7	1019	359	3.09	2.13	58.77	1290.714032	0.35	calc.	climate	PB2-1	0.165024936	4.553293645	PB2	S. richardsonii	SPh-PB	In water	1st
2	15-Jul-17	15:48:01	8.2	1.6	462	29	546	9	10.1	199.7	1020	362	3.08	2.12	56.88	1290.714032	0.35	calc.	climate	PB2-1	0.164250171	4.406863069	PB2	S. richardsonii	SPh-PB	In water	1st
3	15-Jul-17	15:48:09	8.2	1.7	463	29	546	8.9	10.1	199.7	1020	365	3.31	2.41	58.25	1290.714032	0.35	calc.	climate	PB2-1	0.186718354	4.513005868	PB2	S. richardsonii	SPh-PB	In water	1st
4	15-Jul-17	15:48:18	8.2	1.7	463	29	546	9	10.1	199.4	1019	369	3.36	2.64	58.32	1290.714032	0.35	calc.	climate	PB2-1	0.204537948	4.518429222	PB2	S. richardsonii	SPh-PB	In water	1st
5	15-Jul-17	15:48:27	8.2	1.7	462	28	546	9	10.1	199	1019	372	3.4	2.74	56.23	1290.714032	0.35	calc.	climate	PB2-1	0.212285598	4.356503347	PB2	S. richardsonii	SPh-PB	In water	1st
6	15-Jul-17	15:48:38	8.2	1.8	462	28	546	9	10.1	199.4	1019	375	3.44	2.97	56.19	1290.714032	0.35	calc.	climate	PB2-1	0.230105192	4.353404287	PB2	S. richardsonii	SPh-PB	In water	1st
7	15-Jul-17	15:48:48	8.2	1.8	461	28	546	9	10.1	200.7	1019	375	3.5	2.93	55.5	1290.714032	0.35	calc.	climate	PB2-1	0.227006132	4.299945505	PB2	S. richardsonii	SPh-PB	In water	1st
8	15-Jul-17	15:48:56	8.2	1.8	461	28	546	9	10.2	199.4	1020	375	3.58	3.03	56.46	1290.714032	0.35	calc.	climate	PB2-1	0.234753782	4.374322941	PB2	S. richardsonii	SPh-PB	In water	1st
9	15-Jul-17	15:50:46	8.1	1.6	461	33	546	9.1	10.2	200	1020	338	3.09	1.84	65.52	1034.543665	0.35	calc.	climate	PB2-2	0.177856195	6.333227125	PB2	S. richardsonii	SPh-PB	In water	1st
10	15-Jul-17	15:50:55	8.1	1.7	461	34	546	9	10.2	199.4	1020	341	3.23	2.04	66.95	1034.543665	0.35	calc.	climate	PB2-2	0.19718839	6.47145232	PB2	S. richardsonii	SPh-PB	In water	1st
11	15-Jul-17	15:51:05	8.1	1.7	460	33	546	9	10.2	199.4	1019	350	3.39	2.32	65.14	1034.543665	0.35	calc.	climate	PB2-2	0.224253464	6.296495954	PB2	S. richardsonii	SPh-PB	In water	1st
12	15-Jul-17	15:51:15	8.1	1.8	460	33	546	9.1	10.3	199	1019	353	3.49	2.48	65.01	1034.543665	0.35	calc.	climate	PB2-2	0.23971922	6.283930028	PB2	S. richardsonii	SPh-PB	In water	1st
13	15-Jul-17	15:51:28	8.1	1.9	461	34	546	9.1	10.2	198.7	1020	355	3.65	2.97	68.33	1034.543665	0.35	calc.	climate	PB2-2	0.287083098	6.604844467	PB2	S. richardsonii	SPh-PB	In water	1st
14	15-Jul-17	15:51:39	8.1	1.9	460	33	546	9.1	10.2	199.7	1020	360	3.76	3.27	66.63	1034.543665	0.35	calc.	climate	PB2-2	0.31608139	6.440520808	PB2	S. richardsonii	SPh-PB	In water	1st
15	15-Jul-17	15:51:50	8.1	2	460	34	546	9.1	10.3	199.7	1019	360	3.87	3.39	67.49	1034.543665	0.35	calc.	climate	PB2-2	0.327680707	6.523649247	PB2	S. richardsonii	SPh-PB	In water	1st
16	15-Jul-17	15:52:00	8.1	2	460	34	546	9.1	10.3	200.4	1020	360	3.89	3.42	68.24	1034.543665	0.35	calc.	climate	PB2-2	0.330580537	6.596144979	PB2	S. richardsonii	SPh-PB	In water	1st
17	15-Jul-17	15:55:17	7.9	1.8	458	24	546	9.1	10.3	198.7	1019	372	3.42	2.09	48.43	1623.169795	0.35	calc.	climate	PB2-3	0.128760405	2.983668138	PB2	S. richardsonii	SPh-PB	In water	1st
18	15-Jul-17	15:55:28	7.9	1.7	458	25	546	9.1	10.3	200.7	1020	370	3.38	2.05	49	1623.169795	0.35	calc.	climate	PB2-3	0.126296091	3.018784612	PB2	S. richardsonii	SPh-PB	In water	1st
19	15-Jul-17	15:55:37	8	1.8	458	24	546	9.2	10.3	198.7	1020	373	3.43	2.07	47.51	1623.169795	0.35	calc.	climate	PB2-3	0.127528248	2.926988916	PB2	S. richardsonii	SPh-PB	In water	1st
20	15-Jul-17	15:55:47	7.9	1.8	458	24	546	9.1	10.3	200.7	1020	377	3.49	2.25	46.99	1623.169795	0.35	calc.	climate	PB2-3	0.138617661	2.894952835	PB2	S. richardsonii	SPh-PB	In water	1st
21	15-Jul-17	15:55:56	8	1.8	458	25	546	9.2	10.3	199.7	1019	373	3.54	2.25	49.05	1623.169795	0.35	calc.	climate	PB2-3	0.138617661	3.021865004	PB2	S. richardsonii	SPh-PB	In water	1st
22	15-Jul-17	15:56:15	7.9	1.8	458	24	546	9.1	10.3	199.4	1019	378	3.52	2.35	47.18	1623.169795	0.35	calc.	climate	PB2-3	0.144778446	2.906658326	PB2	S. richardsonii	SPh-PB	In water	1st
24	18-Jul-17	11:34:48	9.4	4.1	411	27	546	20.1	21.2	200.7	1005	262	8.05	0.94	53.15	1290.714032	0.35	calc.	climate	PB2-1	0.072827906	4.11787574	PB2	S. richardsonii	SPh-PB	In water	2nd
25	18-Jul-17	11:34:59	9.4	4.4	411	27	546	20.1	21.2	198.7	1004	269	8.77	1.05	54.5	1290.714032	0.35	calc.	climate	PB2-1	0.08135032	4.222469009	PB2	S. richardsonii	SPh-PB	In water	2nd
26	18-Jul-17	11:35:09	9.4	4.5	411	27	546	20.1	21.2	200.4	1005	270	8.83	1.06	54.26	1290.714032	0.35	calc.	climate	PB2-1	0.082125085	4.20387465	PB2	S. richardsonii	SPh-PB	In water	2nd
27	18-Jul-17	11:35:24	9.8	4	411	27	546	20.1	21.2	199.7	1005	258	8.04	0.94	54.7	1290.714032	0.35	calc.	climate	PB2-1	0.072827906	4.237964308	PB2	S. richardsonii	SPh-PB	In water	2nd
28	18-Jul-17	11:35:34	10.3	3.9	411	28	546	20.1	21.2	199	1005	249	7.68	0.89	55.99	1290.714032	0.35	calc.	climate	PB2-1	0.068954081	4.337908988	PB2	S. richardsonii	SPh-PB	In water	2nd
29	18-Jul-17	11:35:40	9.8	3.9	411	28	546	20.1	21.2	199.7	1005	249	7.68	0.89	55.99	1290.714032	0.35	calc.	climate	PB2-1	0.068954081	4.337908988	PB2	S. richardsonii	SPh-PB	In water	2nd
30	18-Jul-17	11:37:30	10.2	4.4	410	38	546	20.7	21.8	198.7	1005	210	8.74	1.02	76	1034.543665	0.35	calc.	climate	PB2-2	0.098594195	7.34623415	PB2	S. richardsonii	SPh-PB	In water	2nd
31	18-Jul-17	11:37:40	10.1	4.7	410	38	546	20.7	21.7	201.4	1005	225	9.27	1.16	76.28	1034.543665	0.35	calc.	climate	PB2-2	0.112126732	7.373299223	PB2	S. richardsonii	SPh-PB	In water	2nd
32	18-Jul-17	11:38:03	10.4	4.8	410	41	546	20.8	21.9	198.7	1005	220	9.58	1.24	81.36	1034.543665	0.35	calc.	climate	PB2-2	0.11985961	7.86433698	PB2	S. richardsonii	SPh-PB	In water	2nd
33	18-Jul-17	11:38:19	10.4	5	410	43	546	20.8	22	200	1005	214	9.76	1.27	84.99	1034.543665	0.35	calc.	climate	PB2-2	0.122759439	8.215216321	PB2	S. richardsonii	SPh-PB	In water	2nd
34	18-Jul-17	11:38:30	9.8	5.1	410	44	546	20.9	22	198.7	1005	216	10.11	1.36	87.81	1034.543665	0.35	calc.	climate	PB2-2	0.131458927	8.487800272	PB2	S. richardsonii	SPh-PB	In water	2nd
35	18-Jul-17	11:38:39	10.5	5.8	410	45	546	20.9	22.1	201	1005	231	11.42	1.63	88.91	1034.543665	0.35	calc.	climate	PB2-2	0.15755739	8.594127346	PB2	S. richardsonii	SPh-PB	In water	2nd
36	18-Jul-17	11:41:13	12.1	4.7	409	32	546	22	23.1	199.4	1005	244	9.22	1.05	63.32	1623.169795	0.35	calc.	climate	PB2-3	0.064688242	3.901009013	PB2	S. richardsonii	SPh-PB	In water	2nd
37	18-Jul-17	11:41:29	11.3	4.7	407	31	546	22	23.1	201.7	1005	252	9.43	1.12	62.09	1623.169795	0.35	calc.	climate	PB2-3	0.069000791	3.825231358	PB2	S. richardsonii	SPh-PB	In water	2nd
38	18-Jul-17	11:41:37	11.3	5.3	407	31	546	22	23.2	199	1005	261	10.47	1.27	62.99	1623.169795	0.35	calc.	climate	PB2-3	0.078241969	3.880678422	PB2	S. richardsonii	SPh-PB	In water	2nd
39	18-Jul-17	11:41:48	11.2	5.4	408	32	546	22.1	23.2	201.4	1005	263	10.61	1.32	63.21	1623.169795	0.35	calc.	climate	PB2-3	0.081322361	3.894232149	PB2	S. richardsonii	SPh-PB	In water	2nd
40	18-Jul-17	11:41:57	11.3	5.5	408	32	546	22.1	23.2	199.7	1005	263	10.96	1.36	64.34	1623.169795	0.35	calc.	climate	PB2-3	0.083786675	3.963849019	PB2	S. richardsonii	SPh-PB	In water	2nd
41	18-Jul-17	11:42:08	11.2	5.5	408	32	546	22.1	23.3	200.4	1005	262	10.97	1.35	64.47	1623.169795	0.35	calc.	climate	PB2-3	0.083170596	3.971858039	PB2	S. richardsonii	SPh-PB	In water	2nd
43	21-Jul-17	11:50:01	7.7	3.7	414	40	546	13.5	14.7	199.7	1014	286	7.33	2.67	78.87	1290.714032	0.35	calc.	climate	PB2-1	0.206862243	6.110571207	PB2	S. richardsonii	SPh-PB	Wet	3rd
44	21-Jul-17	11:50:17	7.6	3.8	413	41	546	13.5	14.7	199	1014	282	7.5	2.81	83.05	1290.714032	0.35	calc.	climate	PB2-1	0.217708953	6.434422958	PB2	S. richardsonii	SPh-PB	Wet	3rd
45	21-Jul-17	11:50:27	7.7	3.9	413	41	546	13.5	14.7	200.4	1014	287	7.69	3.07	81.91	1290.714032	0.35	calc.	climate	PB2-1	0.237852841	6.346099753	PB2	S. richardsonii	SPh-PB	Wet	3rd
46	21-Jul-17	11:50:36	7.5	4	413	42	546	13.5	14.6	199.4	1014	288	7.79	3.4	84.25	1290.714032	0.35	calc.	climate	PB2-1	0.263420085	6.527394753	PB2	S. richardsonii	SPh-PB	Wet	3rd
47	21-Jul-17	11:50:55	7.6	4.1	413	43	546	13.4	14.6	199	1014	288	8.06	3.68	86.5	1290.714032	0.35	calc.	climate	PB2-1	0.285113504	6.701716868	PB2	S. richardsonii	SPh-PB	Wet	3rd
49	21-Jul-17	11:53:13	7.5	4.1	413	38	546	13.2	14.4	199.7	1014	308	8.08	4.17	74.78	1034.543665	0.35	calc.	climate	PB2-2	0.403076268	7.22830776	PB2	S. richardsonii	SPh-PB	Wet	3rd
50	21-Jul-17	11:53:28	7.5	4.3	413	40	546	13.3	14.4	199	1014	308	8.54	5.24	80.01	1034.543665	0.35	calc.	climate	PB2-2	0.506503512	7.733844662	PB2	S. richardsonii	SPh-PB	Wet	3rd
51	21-Jul-17	11:53:48	7.5	4.3	413	42	546	13.3	14.4	199.7	1014	303	8.45	5.29	83.83	1034.543665	0.35	calc.	climate	PB2-2	0.511336561	8.103089589	PB2	S. richardsonii	SPh-PB	Wet	3rd
52	21-Jul-17	11:54:00	7.6	4.4	412	41	546	13.4	14.5	200.7	1014	303	8.53	5.05	82.41	1034.543665	0.35	calc.	climate	PB2-2	0.488137927	7.965831004	PB2	S. richardsonii	SPh-PB	Wet	3rd
53	21-Jul-17	11:54:06	7.6	4.4	412	42	546	13.3	14.5	198.4	1014	304	8.58	5.61	84.02	1034.543665	0.35	calc.	climate	PB2-2	0.542268073	8.121455175	PB2	S. richardsonii	SPh-PB	Wet	3rd
54	21-Jul-17	11:55:33	7.8	3.4	412	21	546	13.5	14.6	201	1014	336	6.73	2.17	42.06	1623.169795	0.35	calc.	climate	PB2-3	0.133689033	2.591226138	PB2	S. richardsonii	SPh-PB	Wet	3rd
55	21-Jul-17	11:55:42	7.8	3.5	412	26	546	13.6	14.7	199	1014	318	6.79	2.16	52.56	1623.169795	0.35	calc.	climate	PB2-3	0.133072954	3.238108555	PB2	S. richardsonii	SPh-PB	Wet	3rd
57	21-Jul-17	11:56:12	7.9	3.7	411	32	546	13.6	14.8	200.4	1014	307	7.17	2.56	63.39	1623.169795	0.35	calc.	climate	PB2-3	0.157716094	3.905321562	PB2	S. richardsonii	SPh-PB	Wet	3rd
58	21-Jul-17	11:56:20	7.9	3.6	411	34	546	13.6	14.8	199.4	1014	300	7.14	2.57	68.11	1623.169795	0.35	calc.	climate	PB2-3	0.158332172	4.19611061	PB2	S. richardsonii	SPh-PB	Wet	3rd
59	21-Jul-17	11:56:29	7.9	3.7	412	34	546	13.6	14.8	201	1014	304	7.38	2.86	68.42	1623.169795	0.35	calc.	climate	PB2-3	0.176198449	4.215209044	PB2	S. richardsonii	SPh-PB	Wet	3rd
81	25-Jul-17	9:37:17	14.2	6.5	397	55	546	22	23.1	199	1011	246	12.86	4.2	108.8	1290.714032	0.35	calc.	climate	PB2-1	0.325401281	8.42944272	PB2	S. richardsonii	SPh-PB	Wet	4th
82	25-Jul-17	9:37:26	14.4	6.7	397	58	546	22	23.2	199.4	1011	242	13.12	4.61	114.91	1290.714032	0.35	calc.	climate	PB2-1	0.357166645	8.902824108	PB2	S. richardsonii	SPh-PB	Wet	4th
83	25-Jul-17	9:37:33	14.4	6.7	397	58	546	22.1	23.2	198.7	1011	242	13.12	4.61	114.91	1290.714032	0.35	calc.	climate	PB2-1	0.357166645	8.902824108	PB2	S. richardsonii	SPh-PB	Wet	4th
84	25-Jul-17	9:37:38	14.4	6.9	397	57	546	22.1	23.2	200.7	1011	248	13.58	5.31	114.13	1290.714032	0.35	calc.	climate	PB2-1	0.411400192	8.842392441	PB2	S. richardsonii	SPh-PB	Wet	4th
85	25-Jul-17	9:37:46	14.2	7	397	59	546	22.1	23.2	199.4	1011	248	13.81	6.26	118.05	1290.714032	0.35	calc.	climate	PB2-1	0.485002862	9.146100304	PB2	S. richardsonii	SPh-PB	Wet	4th
86	25-Jul-17	9:41:16	15.4	4.7	393	39	546	22.2	23.3	199	1011	244	9.3	1.78	77.26	1034.543665	0.35	calc.	climate	PB2-2	0.172056537	7.468026979	PB2	S. richardsonii	SPh-PB	Wet	4th
87	25-Jul-17	9:41:25	15.5	5.1	393	39	546	22.2	23.4	199.7	1011	255	9.98	2.11	77.35	1034.543665	0.35	calc.	climate	PB2-2	0.203954659	7.476726467	PB2	S. richardsonii	SPh-PB	Wet	4th
88	25-Jul-17	9:41:35	15.6	5	393	42	546	22.3	23.4	199.7	1011	244	9.79	2.07	82.91	1034.543665	0.35	calc.	climate	PB2-2	0.20008822	8.014161492	PB2	S. richardsonii	SPh-PB	Wet	4th
90	25-Jul-17	9:41:51	15.6	5.6	392	42	546	22.3	23.5	199	1011	260	11.01	2.83	83.51	1034.543665	0.35	calc.	climate	PB2-2	0.273550561	8.072158077	PB2	S. richardsonii	SPh-PB	Wet	4th
91	25-Jul-17	9:41:58	15.6	5.6	392	42	546	22.3	23.5	199	1011	260	11.01	2.83	83.51	1034.543665	0.35	calc.	climate	PB2-2	0.273550561	8.072158077	PB2	S. richardsonii	SPh-PB	Wet	4th
92	25-Jul-17	9:42:12	15.7	5.8	392	45	546	22.4	23.5	199	1011	257	11.37	3.22	89.1	1034.543665	0.35	calc.	climate	PB2-2	0.311248342	8.612492931	PB2	S. richardsonii	SPh-PB	Wet	4th
93	25-Jul-17	9:44:36	15.3	5.5	390	42	546	22.3	23.5	200.4	1011	250	10.78	2.52	84.3	1623.169795	0.35	calc.	climate	PB2-3	0.15525178	5.193541689	PB2	S. richardsonii	SPh-PB	Wet	4th
94	25-Jul-17	9:44:44	15.3	5.6	390	48	546	22.3	23.5	199	1011	234	10.97	2.67	96.41	1623.169795	0.35	calc.	climate	PB2-3	0.164492957	5.939612743	PB2	S. richardsonii	SPh-PB	Wet	4th
95	25-Jul-17	9:44:56	15.4	5.8	390	48	546	22.3	23.4	200.7	1011	244	11.46	3.14	95.44	1623.169795	0.35	calc.	climate	PB2-3	0.193448647	5.879853129	PB2	S. richardsonii	SPh-PB	Wet	4th
96	25-Jul-17	9:45:04	15.3	6	390	52	546	22.2	23.4	199	1011	238	11.81	3.49	102.95	1623.169795	0.35	calc.	climate	PB2-3	0.215011394	6.342528077	PB2	S. richardsonii	SPh-PB	Wet	4th
97	25-Jul-17	9:45:14	15.3	6	389	51	546	22.2	23.4	198.7	1011	242	11.75	3.73	102.15	1623.169795	0.35	calc.	climate	PB2-3	0.229797278	6.293241798	PB2	S. richardsonii	SPh-PB	Wet	4th
98	25-Jul-17	9:45:23	15.4	6.1	389	54	546	22.2	23.3	199	1011	239	12.03	4.03	106.49	1623.169795	0.35	calc.	climate	PB2-3	0.248279632	6.560619863	PB2	S. richardsonii	SPh-PB	Wet	4th
99	27-Jul-17	11:30:05	12.2	9	388	45	546	24.2	25.4	200.7	999	255	17.97	3.58	89.56	1290.714032	0.35	calc.	climate	PB2-1	0.277365854	6.938794944	PB2	S. richardsonii	SPh-PB	Wet	5th
100	27-Jul-17	11:30:14	12.2	9.6	388	51	546	24.2	25.3	198.7	999	247	19.01	4.6	102.08	1290.714032	0.35	calc.	climate	PB2-1	0.35639188	7.908800669	PB2	S. richardsonii	SPh-PB	Wet	5th
101	27-Jul-17	11:30:25	12	9.8	387	51	546	24.2	25.3	201	999	253	19.67	5.36	101	1290.714032	0.35	calc.	climate	PB2-1	0.415274016	7.825126054	PB2	S. richardsonii	SPh-PB	Wet	5th
102	27-Jul-17	11:30:32	12.1	10.1	387	55	546	24.2	25.3	198.4	999	247	20.1	6.02	108.36	1290.714032	0.35	calc.	climate	PB2-1	0.466408503	8.395353061	PB2	S. richardsonii	SPh-PB	Wet	5th
103	27-Jul-17	11:30:40	11.9	10.1	387	55	546	24.2	25.3	198.7	999	247	20.1	6.02	108.36	1290.714032	0.35	calc.	climate	PB2-1	0.466408503	8.395353061	PB2	S. richardsonii	SPh-PB	Wet	5th
104	27-Jul-17	11:30:52	12	10.2	387	57	546	24.2	25.3	198.4	999	245	20.26	6.65	112.52	1290.714032	0.35	calc.	climate	PB2-1	0.515218696	8.717655283	PB2	S. richardsonii	SPh-PB	Wet	5th
105	27-Jul-17	11:33:13	12.2	9.3	385	45	546	24.6	25.7	199.4	1000	253	18.57	3.58	88.74	1034.543665	0.35	calc.	climate	PB2-2	0.346046293	8.57769498	PB2	S. richardsonii	SPh-PB	Wet	5th
106	27-Jul-17	11:33:23	12.3	9.4	385	46	546	24.6	25.7	199.7	999	251	18.81	3.81	91.44	1034.543665	0.35	calc.	climate	PB2-2	0.368278317	8.838679614	PB2	S. richardsonii	SPh-PB	Wet	5th
107	27-Jul-17	11:33:34	12.5	9.3	384	45	546	24.6	25.8	199.7	1000	251	18.56	3.59	89.58	1034.543665	0.35	calc.	climate	PB2-2	0.347012903	8.658890199	PB2	S. richardsonii	SPh-PB	Wet	5th
108	27-Jul-17	11:33:42	12.4	9.1	384	46	546	24.6	25.8	198.7	1000	246	18.12	3.47	91.73	1034.543665	0.35	calc.	climate	PB2-2	0.335413586	8.866711297	PB2	S. richardsonii	SPh-PB	Wet	5th
109	27-Jul-17	11:33:53	12.1	9.4	384	47	546	24.7	25.8	199.7	999	248	18.87	3.81	93.66	1034.543665	0.35	calc.	climate	PB2-2	0.368278317	9.05326698	PB2	S. richardsonii	SPh-PB	Wet	5th
110	27-Jul-17	11:34:02	12.5	9.7	384	48	546	24.7	25.9	199.7	999	247	19.4	4	95.81	1034.543665	0.35	calc.	climate	PB2-2	0.386643903	9.261088078	PB2	S. richardsonii	SPh-PB	Wet	5th
111	27-Jul-17	11:34:12	13.1	9.4	384	48	546	24.8	25.9	198.4	999	246	18.67	3.76	94.28	1034.543665	0.35	calc.	climate	PB2-2	0.363445268	9.113196785	PB2	S. richardsonii	SPh-PB	Wet	5th
112	27-Jul-17	11:34:21	12.6	8.9	384	48	546	24.8	25.9	199.4	999	239	17.75	3.35	95.58	1034.543665	0.35	calc.	climate	PB2-2	0.323814268	9.238856053	PB2	S. richardsonii	SPh-PB	Wet	5th
113	27-Jul-17	11:35:48	13.1	9.9	382	47	546	24.8	26	200	999	255	19.63	4.92	93.83	1623.169795	0.35	calc.	climate	PB2-3	0.303110618	5.780664492	PB2	S. richardsonii	SPh-PB	Wet	5th
114	27-Jul-17	11:35:57	13	9.9	382	49	546	24.8	26	199	999	251	19.76	5.23	98.39	1623.169795	0.35	calc.	climate	PB2-3	0.322209051	6.061596285	PB2	S. richardsonii	SPh-PB	Wet	5th
115	27-Jul-17	11:36:06	13.2	10.1	382	49	546	24.8	25.9	199.7	999	255	20.15	5.94	98.17	1623.169795	0.35	calc.	climate	PB2-3	0.365950624	6.048042558	PB2	S. richardsonii	SPh-PB	Wet	5th
116	27-Jul-17	11:36:16	13.2	10	382	51	546	24.8	25.9	199.4	1000	248	19.88	5.76	102.57	1623.169795	0.35	calc.	climate	PB2-3	0.354861212	6.319117094	PB2	S. richardsonii	SPh-PB	Wet	5th
117	27-Jul-17	11:36:25	13.1	10.1	381	51	546	24.7	25.9	198.7	1000	252	20.03	6.32	100.93	1623.169795	0.35	calc.	climate	PB2-3	0.389361607	6.218080222	PB2	S. richardsonii	SPh-PB	Wet	5th
118	27-Jul-17	11:36:34	13.2	10.2	381	53	546	24.7	25.8	199.7	1000	249	20.41	7.1	106.4	1623.169795	0.35	calc.	climate	PB2-3	0.437415729	6.555075157	PB2	S. richardsonii	SPh-PB	Wet	5th
1	15-Jul-17	15:59:09	7.9	1.4	456	22	546	9.2	10.3	199.4	1020	355	2.77	1.24	43.7	348.2058016	0.35	calc.	climate	PB3-1	0.356111241	12.55004937	PB3	S. pulchra	SPh-PB	In water	1st
2	15-Jul-17	15:59:19	7.9	1.5	456	22	546	9.2	10.4	201.4	1020	360	2.94	1.34	43.69	348.2058016	0.35	calc.	climate	PB3-1	0.384829889	12.5471775	PB3	S. pulchra	SPh-PB	In water	1st
3	15-Jul-17	15:59:32	7.9	1.6	456	20	546	9.2	10.3	199	1020	375	3.05	1.51	39.03	348.2058016	0.35	calc.	climate	PB3-1	0.433651591	11.20888849	PB3	S. pulchra	SPh-PB	In water	1st
4	15-Jul-17	15:59:39	7.9	1.6	456	19	546	9.2	10.3	199	1020	376	3.06	1.5	38.14	348.2058016	0.35	calc.	climate	PB3-1	0.430779727	10.95329251	PB3	S. pulchra	SPh-PB	In water	1st
5	15-Jul-17	15:59:50	7.9	1.6	456	18	546	9.2	10.4	199.4	1020	380	3.12	1.53	36.74	348.2058016	0.35	calc.	climate	PB3-1	0.439395321	10.55123144	PB3	S. pulchra	SPh-PB	In water	1st
6	15-Jul-17	15:59:56	7.9	1.6	456	18	546	9.3	10.4	201	1020	378	3.05	1.49	36.94	348.2058016	0.35	calc.	climate	PB3-1	0.427907862	10.60866873	PB3	S. pulchra	SPh-PB	In water	1st
7	15-Jul-17	16:01:34	7.9	1.5	456	23	546	9.2	10.4	198.7	1020	355	2.94	1.36	45.84	300.7506068	0.35	calc.	climate	PB3-2	0.452201914		PB3	S. pulchra	SPh-PB	In water	1st
8	15-Jul-17	16:01:43	7.9	1.5	456	21	546	9.2	10.4	200	1020	364	2.95	1.39	41.73	300.7506068	0.35	calc.	climate	PB3-2	0.462176956		PB3	S. pulchra	SPh-PB	In water	1st
9	15-Jul-17	16:01:49	8	1.5	456	21	546	9.2	10.5	201	1020	365	3.01	1.42	42.09	300.7506068	0.35	calc.	climate	PB3-2	0.472151998		PB3	S. pulchra	SPh-PB	In water	1st
10	15-Jul-17	16:01:58	7.9	1.5	456	19	546	9.2	10.4	199	1020	375	2.97	1.45	37.93	300.7506068	0.35	calc.	climate	PB3-2	0.482127041	12.61177838	PB3	S. pulchra	SPh-PB	In water	1st
11	15-Jul-17	16:02:08	8	1.6	455	19	546	9.2	10.5	199	1020	376	3.05	1.46	37.45	300.7506068	0.35	calc.	climate	PB3-2	0.485452055	12.4521777	PB3	S. pulchra	SPh-PB	In water	1st
12	15-Jul-17	16:02:17	8	1.6	455	18	546	9.3	10.4	199.7	1020	381	3.1	1.58	36.26	300.7506068	0.35	calc.	climate	PB3-2	0.525352223	12.05650103	PB3	S. pulchra	SPh-PB	In water	1st
14	15-Jul-17	16:07:24	8.1	1.5	453	25	546	9.3	10.5	198.7	1020	345	2.84	1.33	48.85	745.6456048	0.35	calc.	climate	PB3-3	0.178368918	6.55136967	PB3	S. pulchra	SPh-PB	In water	1st
15	15-Jul-17	16:07:42	8	1.6	454	23	546	9.3	10.5	199	1020	359	3.11	1.61	46.77	745.6456048	0.35	calc.	climate	PB3-3	0.21592027	6.272416775	PB3	S. pulchra	SPh-PB	In water	1st
16	15-Jul-17	16:08:03	8.1	1.6	454	22	546	9.3	10.5	199.4	1020	366	3.16	1.68	44.56	745.6456048	0.35	calc.	climate	PB3-3	0.225308107	5.976029325	PB3	S. pulchra	SPh-PB	In water	1st
17	15-Jul-17	16:08:16	8.1	1.6	454	22	546	9.4	10.6	200.4	1020	369	3.24	1.72	43.65	745.6456048	0.35	calc.	climate	PB3-3	0.230672586	5.853987433	PB3	S. pulchra	SPh-PB	In water	1st
18	15-Jul-17	16:08:26	8.1	1.8	454	22	546	9.4	10.6	199	1020	375	3.44	2.02	43.05	745.6456048	0.35	calc.	climate	PB3-3	0.270906177	5.773520252	PB3	S. pulchra	SPh-PB	In water	1st
19	15-Jul-17	16:08:36	8.1	1.7	454	21	546	9.3	10.6	199.7	1020	376	3.41	1.99	42.37	745.6456048	0.35	calc.	climate	PB3-3	0.266882818	5.682324113	PB3	S. pulchra	SPh-PB	In water	1st
20	18-Jul-17	11:48:31	9.5	3.7	407	15	546	21.7	22.9	198.7	1005	289	7.21	0.57	29.02	348.2058016	0.35	calc.	climate	PB3-1	0.163696296	8.334151777	PB3	S. pulchra	SPh-PB	In water	2nd
21	18-Jul-17	11:48:38	9.3	3.7	407	14	546	21.7	22.8	199	1005	296	7.39	0.61	28.49	348.2058016	0.35	calc.	climate	PB3-1	0.175183755	8.18194294	PB3	S. pulchra	SPh-PB	In water	2nd
22	18-Jul-17	11:48:46	9.3	3.9	407	14	546	21.7	22.8	200.7	1005	301	7.86	0.66	28.67	348.2058016	0.35	calc.	climate	PB3-1	0.18954308	8.233636507	PB3	S. pulchra	SPh-PB	In water	2nd
23	18-Jul-17	11:48:55	9.4	3.9	407	15	546	21.6	22.8	198.7	1005	297	7.71	0.64	29.2	348.2058016	0.35	calc.	climate	PB3-1	0.18379935	8.385845344	PB3	S. pulchra	SPh-PB	In water	2nd
24	18-Jul-17	11:49:06	9.5	3.9	406	14	546	21.7	22.8	201	1005	303	7.76	0.66	27.95	348.2058016	0.35	calc.	climate	PB3-1	0.18954308	8.026862238	PB3	S. pulchra	SPh-PB	In water	2nd
25	18-Jul-17	11:49:14	9.3	3.8	406	14	546	21.6	22.8	198.7	1005	303	7.62	0.64	27.37	701.4743568	0.35	calc.	climate	PB3-2	0.091236407	3.901781973	PB3	S. pulchra	SPh-PB	In water	2nd
26	18-Jul-17	11:51:44	9.6	4.6	406	23	546	21.8	22.9	199	1005	271	9.12	0.86	45.03	701.4743568	0.35	calc.	climate	PB3-2	0.122598922	6.419336582	PB3	S. pulchra	SPh-PB	In water	2nd
27	18-Jul-17	11:51:50	9.7	4.6	406	23	546	21.8	22.9	199	1005	271	9.12	0.86	45.03	701.4743568	0.35	calc.	climate	PB3-2	0.122598922	6.419336582	PB3	S. pulchra	SPh-PB	In water	2nd
28	18-Jul-17	11:51:57	9.6	4.7	406	23	546	21.8	22.9	200.7	1005	274	9.33	0.89	45.11	701.4743568	0.35	calc.	climate	PB3-2	0.126875629	6.430741133	PB3	S. pulchra	SPh-PB	In water	2nd
29	18-Jul-17	11:52:06	9.4	5	406	23	546	21.8	22.9	199	1005	281	9.88	0.98	45.4	701.4743568	0.35	calc.	climate	PB3-2	0.139705748	6.47208263	PB3	S. pulchra	SPh-PB	In water	2nd
30	18-Jul-17	11:52:15	9.7	5	406	23	546	21.8	22.9	199.4	1005	280	9.86	0.97	45.22	701.4743568	0.35	calc.	climate	PB3-2	0.13828018	6.44642239	PB3	S. pulchra	SPh-PB	In water	2nd
31	18-Jul-17	11:52:25	9.6	4.8	406	23	546	21.7	22.9	198.7	1005	278	9.56	0.95	45.32	745.6456048	0.35	calc.	climate	PB3-3	0.12740637	6.077954421	PB3	S. pulchra	SPh-PB	In water	2nd
32	18-Jul-17	11:54:29	10	4.5	406	18	546	22	23.1	201.4	1005	292	8.81	0.82	36.21	745.6456048	0.35	calc.	climate	PB3-3	0.109971814	4.856194386	PB3	S. pulchra	SPh-PB	In water	2nd
33	18-Jul-17	11:54:48	10	4.6	406	19	546	21.9	23.1	201.7	1005	294	9.13	0.88	37.26	745.6456048	0.35	calc.	climate	PB3-3	0.118018532	4.997011953	PB3	S. pulchra	SPh-PB	In water	2nd
34	18-Jul-17	11:55:07	9.5	4.7	406	20	546	21.9	23.1	200	1005	292	9.29	0.91	38.89	745.6456048	0.35	calc.	climate	PB3-3	0.122041892	5.215614462	PB3	S. pulchra	SPh-PB	In water	2nd
35	18-Jul-17	11:55:15	10.1	5.3	406	21	546	21.9	23	199	1005	299	10.5	1.08	40.77	745.6456048	0.35	calc.	climate	PB3-3	0.144840926	5.467744963	PB3	S. pulchra	SPh-PB	In water	2nd
36	18-Jul-17	11:55:28	10.1	4.7	405	20	546	21.8	23.1	200.4	1005	289	9.33	0.92	40.09	745.6456048	0.35	calc.	climate	PB3-3	0.123383011	5.376548825	PB3	S. pulchra	SPh-PB	In water	2nd
37	21-Jul-17	11:59:30	7.4	2.9	412	16	546	13.1	14.2	199	1014	341	5.62	1.41	31.93	348.2058016	0.35	calc.	climate	PB3-1	0.404932943	9.169864446	PB3	S. pulchra	SPh-PB	Wet	3rd
38	21-Jul-17	11:59:41	7.5	2.9	411	16	546	13	14.2	200.4	1014	343	5.62	1.45	30.85	348.2058016	0.35	calc.	climate	PB3-1	0.416420402	8.859703043	PB3	S. pulchra	SPh-PB	Wet	3rd
39	21-Jul-17	11:59:50	7.5	3	411	18	546	13	14.1	199	1014	336	5.91	1.65	36.74	348.2058016	0.35	calc.	climate	PB3-1	0.473857699	10.55123144	PB3	S. pulchra	SPh-PB	Wet	3rd
40	21-Jul-17	12:00:01	7.4	3.1	411	18	546	13	14.1	201.4	1014	338	6	1.7	36.33	348.2058016	0.35	calc.	climate	PB3-1	0.488217023	10.43348498	PB3	S. pulchra	SPh-PB	Wet	3rd
41	21-Jul-17	12:00:16	7.5	3.2	410	19	546	13	14.2	200	1014	336	6.23	1.84	38.7	348.2058016	0.35	calc.	climate	PB3-1	0.528423131	11.11411695	PB3	S. pulchra	SPh-PB	Wet	3rd
42	21-Jul-17	12:00:30	7.4	3.3	410	19	546	13	14.1	198.7	1014	339	6.45	2.01	38.56	348.2058016	0.35	calc.	climate	PB3-1	0.577244834	11.07391084	PB3	S. pulchra	SPh-PB	Wet	3rd
43	21-Jul-17	12:01:54	7.5	3.2	410	20	546	13.4	14.5	200.4	1013	333	6.25	1.76	38.86	701.4743568	0.35	calc.	climate	PB3-2	0.25090012	5.539760595	PB3	S. pulchra	SPh-PB	Wet	3rd
44	21-Jul-17	12:02:06	7.5	3.3	410	23	546	13.4	14.5	198.4	1014	323	6.55	1.95	46.68	701.4743568	0.35	calc.	climate	PB3-2	0.277985928	6.654555444	PB3	S. pulchra	SPh-PB	Wet	3rd
45	21-Jul-17	12:02:13	7.7	3.5	410	23	546	13.5	14.6	200.7	1014	325	6.76	2.04	46.43	701.4743568	0.35	calc.	climate	PB3-2	0.290816048	6.618916223	PB3	S. pulchra	SPh-PB	Wet	3rd
46	21-Jul-17	12:02:32	8	3.4	410	26	546	13.6	14.7	201.4	1014	318	6.76	2.13	51.57	701.4743568	0.35	calc.	climate	PB3-2	0.303646167	7.351658617	PB3	S. pulchra	SPh-PB	Wet	3rd
47	21-Jul-17	12:02:46	8	3.3	410	28	546	13.7	14.8	199.7	1014	309	6.59	2.07	56.18	701.4743568	0.35	calc.	climate	PB3-2	0.295092754	8.008845862	PB3	S. pulchra	SPh-PB	Wet	3rd
48	21-Jul-17	12:02:59	7.9	3.4	410	29	546	13.7	14.9	199	1014	308	6.71	2.18	57.78	701.4743568	0.35	calc.	climate	PB3-2	0.310774012	8.23693688	PB3	S. pulchra	SPh-PB	Wet	3rd
49	21-Jul-17	12:08:07	8.1	2.9	408	19	546	14.5	15.7	200	1013	316	5.66	1.18	37.83	745.6456048	0.35	calc.	climate	PB3-3	0.158252123	5.073455775	PB3	S. pulchra	SPh-PB	Wet	3rd
50	21-Jul-17	12:08:25	8.1	3	408	22	546	14.6	15.7	200.7	1014	307	5.83	1.26	43.29	745.6456048	0.35	calc.	climate	PB3-3	0.168981081	5.805707124	PB3	S. pulchra	SPh-PB	Wet	3rd
51	21-Jul-17	12:08:34	8.1	3.2	408	21	546	14.6	15.7	201	1014	317	6.36	1.5	42.65	745.6456048	0.35	calc.	climate	PB3-3	0.201167953	5.719875464	PB3	S. pulchra	SPh-PB	Wet	3rd
52	21-Jul-17	12:08:43	8.2	3.4	408	24	546	14.6	15.8	200.4	1014	310	6.69	1.61	47.68	745.6456048	0.35	calc.	climate	PB3-3	0.21592027	6.394458667	PB3	S. pulchra	SPh-PB	Wet	3rd
53	21-Jul-17	12:09:01	8.2	3.4	408	26	546	14.6	15.8	199	1014	304	6.73	1.67	51.44	745.6456048	0.35	calc.	climate	PB3-3	0.223966988	6.898719669	PB3	S. pulchra	SPh-PB	Wet	3rd
54	21-Jul-17	12:09:19	8.2	3.6	407	27	546	14.7	15.8	199.4	1014	304	7.05	1.84	54.18	745.6456048	0.35	calc.	climate	PB3-3	0.246766022	7.266186463	PB3	S. pulchra	SPh-PB	Wet	3rd
76	25-Jul-17	10:09:03	16.5	2.9	382	13	546	24	25.1	200.4	1011	273	5.75	0.55	26.25	348.2058016	0.35	calc.	climate	PB3-1	0.157952566	7.538645215	PB3	S. pulchra	SPh-PB	Wet	4th
77	25-Jul-17	10:09:11	16.5	2.9	382	15	546	24	25.1	199.7	1011	258	5.72	0.55	30.27	348.2058016	0.35	calc.	climate	PB3-1	0.157952566	8.693134882	PB3	S. pulchra	SPh-PB	Wet	4th
78	25-Jul-17	10:09:21	16.7	3	382	15	546	24.1	25.2	200.7	1011	262	5.95	0.57	30.03	348.2058016	0.35	calc.	climate	PB3-1	0.163696296	8.624210126	PB3	S. pulchra	SPh-PB	Wet	4th
79	25-Jul-17	10:09:31	16.8	3.3	382	16	546	24.2	25.3	199.4	1011	264	6.52	0.66	32.59	348.2058016	0.35	calc.	climate	PB3-1	0.18954308	9.359407526	PB3	S. pulchra	SPh-PB	Wet	4th
80	25-Jul-17	10:09:40	16.8	3.4	382	17	546	24.2	25.4	199.4	1011	263	6.78	0.68	34.03	348.2058016	0.35	calc.	climate	PB3-1	0.195286809	9.772956063	PB3	S. pulchra	SPh-PB	Wet	4th
81	25-Jul-17	10:09:49	17	3.6	382	18	546	24.2	25.4	199	1011	261	7.04	0.73	36.44	348.2058016	0.35	calc.	climate	PB3-1	0.209646134	10.46507549	PB3	S. pulchra	SPh-PB	Wet	4th
82	25-Jul-17	10:12:52	15.5	3.4	381	23	546	24.5	25.6	201.7	1011	203	6.66	0.56	45.08	701.4743568	0.35	calc.	climate	PB3-2	0.079831856	6.426464426	PB3	S. pulchra	SPh-PB	Wet	4th
83	25-Jul-17	10:12:59	15.5	3.6	381	29	546	24.5	25.6	199	1011	176	7.13	0.63	56.76	701.4743568	0.35	calc.	climate	PB3-2	0.089810838	8.091528856	PB3	S. pulchra	SPh-PB	Wet	4th
84	25-Jul-17	10:13:18	16	3.9	381	32	546	24.6	25.7	198.4	1011	174	7.69	0.73	63.74	701.4743568	0.35	calc.	climate	PB3-2	0.104066527	9.086575921	PB3	S. pulchra	SPh-PB	Wet	4th
85	25-Jul-17	10:13:28	16.3	4	381	32	546	24.5	25.7	199.4	1011	188	7.98	0.8	62.88	701.4743568	0.35	calc.	climate	PB3-2	0.114045509	8.963976999	PB3	S. pulchra	SPh-PB	Wet	4th
86	25-Jul-17	10:13:38	16.3	4.1	381	34	546	24.6	25.7	199.4	1011	177	8.09	0.83	68.43	701.4743568	0.35	calc.	climate	PB3-2	0.118322215	9.755167717	PB3	S. pulchra	SPh-PB	Wet	4th
87	25-Jul-17	10:13:49	16.6	4.3	380	34	546	24.6	25.8	200.7	1011	185	8.49	0.89	68.37	701.4743568	0.35	calc.	climate	PB3-2	0.126875629	9.746614304	PB3	S. pulchra	SPh-PB	Wet	4th
88	25-Jul-17	10:16:58	13.7	4.9	380	24	546	24.6	25.7	201.4	1011	237	9.55	0.85	47.92	745.6456048	0.35	calc.	climate	PB3-3	0.113995173	6.426645539	PB3	S. pulchra	SPh-PB	Wet	4th
89	25-Jul-17	10:17:11	13.6	5.2	380	29	546	24.5	25.7	199.4	1011	223	10.2	0.98	57.82	745.6456048	0.35	calc.	climate	PB3-3	0.131429729	7.754354029	PB3	S. pulchra	SPh-PB	Wet	4th
90	25-Jul-17	10:17:17	13.5	5.6	381	29	546	24.6	25.7	199.4	1011	232	11.06	1.11	58.62	745.6456048	0.35	calc.	climate	PB3-3	0.148864285	7.861643604	PB3	S. pulchra	SPh-PB	Wet	4th
91	25-Jul-17	10:17:26	13.5	5.8	381	31	546	24.5	25.7	199	1011	227	11.38	1.15	62.19	745.6456048	0.35	calc.	climate	PB3-3	0.154228764	8.340423332	PB3	S. pulchra	SPh-PB	Wet	4th
92	25-Jul-17	10:17:36	13.2	6	381	31	546	24.6	25.7	199	1011	234	11.77	1.25	61.95	745.6456048	0.35	calc.	climate	PB3-3	0.167639961	8.30823646	PB3	S. pulchra	SPh-PB	Wet	4th
93	25-Jul-17	10:17:45	13.3	6.1	381	33	546	24.6	25.7	199.7	1011	229	12.05	1.28	65.33	745.6456048	0.35	calc.	climate	PB3-3	0.17166332	8.761534914	PB3	S. pulchra	SPh-PB	Wet	4th
94	27-Jul-17	11:47:51	11.6	4.9	378	15	546	22.7	23.8	201	1000	295	9.71	1.01	29.64	348.2058016	0.35	calc.	climate	PB3-1	0.290058349	8.512207397	PB3	S. pulchra	SPh-PB	Wet	5th
95	27-Jul-17	11:48:00	11.5	5.1	378	16	546	22.7	23.9	199.7	1000	290	10.18	1.07	32.82	348.2058016	0.35	calc.	climate	PB3-1	0.307289538	9.425460417	PB3	S. pulchra	SPh-PB	Wet	5th
96	27-Jul-17	11:48:11	11.6	5.3	378	17	546	22.6	23.8	200.7	1000	293	10.51	1.15	33.2	348.2058016	0.35	calc.	climate	PB3-1	0.330264457	9.534591281	PB3	S. pulchra	SPh-PB	Wet	5th
97	27-Jul-17	11:48:19	11.4	5.3	378	18	546	22.6	23.8	199	1000	288	10.48	1.16	35.37	348.2058016	0.35	calc.	climate	PB3-1	0.333136322	10.15778595	PB3	S. pulchra	SPh-PB	Wet	5th
98	27-Jul-17	11:48:30	11.4	5.4	378	18	546	22.6	23.7	199.7	1000	291	10.77	1.22	35.22	348.2058016	0.35	calc.	climate	PB3-1	0.350367511	10.11470798	PB3	S. pulchra	SPh-PB	Wet	5th
99	27-Jul-17	11:48:38	11.4	5.5	378	19	546	22.6	23.7	198.7	1000	288	10.89	1.24	37.04	348.2058016	0.35	calc.	climate	PB3-1	0.356111241	10.63738738	PB3	S. pulchra	SPh-PB	Wet	5th
103	27-Jul-17	11:50:33	11.3	7	378	31	546	22.8	23.9	199.7	1000	265	13.91	2.08	61.49	701.4743568	0.35	calc.	climate	PB3-2	0.296518323	8.765822928	PB3	S. pulchra	SPh-PB	Wet	5th
104	27-Jul-17	11:50:43	11.3	7.2	378	31	546	22.8	23.9	199.4	1000	270	14.44	2.32	61.55	701.4743568	0.35	calc.	climate	PB3-2	0.330731976	8.774376341	PB3	S. pulchra	SPh-PB	Wet	5th
105	27-Jul-17	11:50:55	11.3	7.3	378	35	546	22.8	23.9	198.7	1000	258	14.53	2.37	69.25	701.4743568	0.35	calc.	climate	PB3-2	0.33785982	9.872064364	PB3	S. pulchra	SPh-PB	Wet	5th
106	27-Jul-17	11:51:01	11.3	7.6	378	35	546	22.8	24	198.7	1000	262	15.02	2.57	68.92	701.4743568	0.35	calc.	climate	PB3-2	0.366371197	9.825020592	PB3	S. pulchra	SPh-PB	Wet	5th
107	27-Jul-17	11:51:11	11.3	7.7	378	37	546	22.9	24	199	1000	258	15.31	2.75	73.58	701.4743568	0.35	calc.	climate	PB3-2	0.392031437	10.48933568	PB3	S. pulchra	SPh-PB	Wet	5th
108	27-Jul-17	11:51:21	11.2	7.9	378	37	546	22.8	24	199.4	1000	260	15.65	2.93	74.14	701.4743568	0.35	calc.	climate	PB3-2	0.417691676	10.56916754	PB3	S. pulchra	SPh-PB	Wet	5th
110	27-Jul-17	11:53:43	11.9	7.8	378	37	546	23.4	24.6	198.7	1000	255	15.42	2.52	72.93	745.6456048	0.35	calc.	climate	PB3-3	0.337962161	9.780785876	PB3	S. pulchra	SPh-PB	Wet	5th
111	27-Jul-17	11:53:53	12	7.9	378	36	546	23.5	24.7	200.7	1000	258	15.77	2.67	72.61	745.6456048	0.35	calc.	climate	PB3-3	0.358078956	9.737870046	PB3	S. pulchra	SPh-PB	Wet	5th
112	27-Jul-17	11:54:02	11.9	8	378	40	546	23.5	24.6	199	1000	251	15.89	2.84	79.08	745.6456048	0.35	calc.	climate	PB3-3	0.380877991	10.60557448	PB3	S. pulchra	SPh-PB	Wet	5th
113	27-Jul-17	11:54:12	12	8	378	40	546	23.5	24.7	200.4	1000	249	15.98	2.82	79.75	745.6456048	0.35	calc.	climate	PB3-3	0.378195752	10.6954295	PB3	S. pulchra	SPh-PB	Wet	5th
114	27-Jul-17	11:54:21	12	8	378	42	546	23.5	24.6	199.4	1000	243	15.93	2.89	84.5	745.6456048	0.35	calc.	climate	PB3-3	0.387583589	11.33246135	PB3	S. pulchra	SPh-PB	Wet	5th
115	27-Jul-17	11:54:32	12	8	378	42	546	23.5	24.6	200.7	1000	243	15.99	2.9	84.71	745.6456048	0.35	calc.	climate	PB3-3	0.388924709	11.36062487	PB3	S. pulchra	SPh-PB	Wet	5th
116	27-Jul-17	11:54:41	12.1	8	378	44	546	23.5	24.7	199.4	1000	238	15.92	2.85	87.24	745.6456048	0.35	calc.	climate	PB3-3	0.382219111	11.69992815	PB3	S. pulchra	SPh-PB	Wet	5th
1	15-Jul-17	16:13:09	8.1	1.7	452	21	546	9.7	10.9	199.7	1020	369	3.34	1.65	41.75	343.770935	0.35	calc.	climate	PB4-1	0.479970769	12.14471491	PB4	S. pulchra	SPh-PB	In water	1st
2	15-Jul-17	16:13:21	8.1	1.7	452	19	546	9.7	10.9	199.4	1020	376	3.36	1.66	38.39	343.770935	0.35	calc.	climate	PB4-1	0.482879683	11.16731989	PB4	S. pulchra	SPh-PB	In water	1st
3	15-Jul-17	16:13:25	8.2	1.7	452	19	546	9.7	10.9	199.4	1020	376	3.36	1.66	38.39	343.770935	0.35	calc.	climate	PB4-1	0.482879683	11.16731989	PB4	S. pulchra	SPh-PB	In water	1st
4	15-Jul-17	16:13:34	8.1	1.7	453	19	546	9.7	10.9	201	1020	378	3.41	1.76	38.46	343.770935	0.35	calc.	climate	PB4-1	0.51196882	11.18768229	PB4	S. pulchra	SPh-PB	In water	1st
5	15-Jul-17	16:13:47	8.1	1.7	453	17	546	9.7	10.8	199.4	1020	384	3.37	1.75	34.82	343.770935	0.35	calc.	climate	PB4-1	0.509059906	10.12883768	PB4	S. pulchra	SPh-PB	In water	1st
6	15-Jul-17	16:13:57	8.1	1.8	452	17	546	9.8	10.9	199.4	1020	387	3.49	1.76	33.22	343.770935	0.35	calc.	climate	PB4-1	0.51196882	9.663411481	PB4	S. pulchra	SPh-PB	In water	1st
7	15-Jul-17	16:15:55	8.2	1.6	451	21	546	9.7	10.9	199.7	1020	359	3.1	1.4	42.18	315.4559938	0.35	calc.	climate	PB4-2	0.443801997		PB4	S. pulchra	SPh-PB	In water	1st
8	15-Jul-17	16:16:06	8.1	1.6	451	21	546	9.7	10.9	200	1020	361	3.14	1.46	42.01	315.4559938	0.35	calc.	climate	PB4-2	0.462822083		PB4	S. pulchra	SPh-PB	In water	1st
9	15-Jul-17	16:16:15	8.1	1.7	451	19	546	9.7	10.9	199	1020	373	3.27	1.6	38.41	315.4559938	0.35	calc.	climate	PB4-2	0.507202282	12.17602479	PB4	S. pulchra	SPh-PB	In water	1st
10	15-Jul-17	16:16:25	8.1	1.7	450	19	546	9.7	10.9	199	1020	375	3.32	1.66	37.71	315.4559938	0.35	calc.	climate	PB4-2	0.526222368	11.95412379	PB4	S. pulchra	SPh-PB	In water	1st
11	15-Jul-17	16:16:34	8.2	1.7	450	18	546	9.8	10.9	198.4	1020	379	3.36	1.71	35.92	315.4559938	0.35	calc.	climate	PB4-2	0.542072439	11.38669124	PB4	S. pulchra	SPh-PB	In water	1st
12	15-Jul-17	16:16:45	8.1	1.8	450	18	546	9.7	10.9	200.4	1020	382	3.5	1.88	36.07	315.4559938	0.35	calc.	climate	PB4-2	0.595962682	11.43424145	PB4	S. pulchra	SPh-PB	In water	1st
13	15-Jul-17	16:18:53	8.1	1.5	450	19	546	9.6	10.8	199.4	1020	363	3.03	1.35	38.85	462.7473912	0.35	calc.	climate	PB4-3	0.291735842	8.395509243	PB4	S. pulchra	SPh-PB	In water	1st
14	15-Jul-17	16:19:06	8.1	1.7	449	19	546	9.6	10.8	199.4	1020	374	3.24	1.58	36.85	462.7473912	0.35	calc.	climate	PB4-3	0.341438986	7.963307995	PB4	S. pulchra	SPh-PB	In water	1st
15	15-Jul-17	16:19:16	8.1	1.7	449	19	546	9.6	10.8	199	1020	377	3.38	1.73	37.02	462.7473912	0.35	calc.	climate	PB4-3	0.37385408	8.000045101	PB4	S. pulchra	SPh-PB	In water	1st
16	15-Jul-17	16:19:25	8	1.7	449	18	546	9.6	10.7	199.7	1020	380	3.33	1.71	35.15	462.7473912	0.35	calc.	climate	PB4-3	0.369532067	7.595936934	PB4	S. pulchra	SPh-PB	In water	1st
17	15-Jul-17	16:19:35	8.1	1.7	450	18	546	9.6	10.8	199.4	1020	379	3.38	1.7	36	462.7473912	0.35	calc.	climate	PB4-3	0.367371061	7.779622465	PB4	S. pulchra	SPh-PB	In water	1st
18	15-Jul-17	16:19:44	8	1.8	450	17	546	9.6	10.7	199.4	1020	385	3.53	1.97	34.89	462.7473912	0.35	calc.	climate	PB4-3	0.425718229	7.539750772	PB4	S. pulchra	SPh-PB	In water	1st
19	15-Jul-17	16:19:55	8	1.8	450	17	546	9.6	10.7	201	1020	385	3.52	1.93	34.65	462.7473912	0.35	calc.	climate	PB4-3	0.417074204	7.487886622	PB4	S. pulchra	SPh-PB	In water	1st
20	15-Jul-17	16:20:03	8	1.8	450	17	546	9.6	10.7	199	1020	388	3.61	2.07	34.36	462.7473912	0.35	calc.	climate	PB4-3	0.447328292	7.425217441	PB4	S. pulchra	SPh-PB	In water	1st
21	15-Jul-17	16:20:14	8.1	1.9	450	17	546	9.6	10.8	200.4	1020	387	3.65	2.06	34.85	462.7473912	0.35	calc.	climate	PB4-3	0.445167285	7.531106747	PB4	S. pulchra	SPh-PB	In water	1st
22	15-Jul-17	16:20:22	8	1.9	450	17	546	9.6	10.8	199.4	1020	390	3.71	2.21	34.14	462.7473912	0.35	calc.	climate	PB4-3	0.477582379	7.377675304	PB4	S. pulchra	SPh-PB	In water	1st
23	18-Jul-17	11:59:10	10	4.4	406	16	546	21.9	23.1	198.7	1005	306	8.73	0.81	31.33	343.770935	0.35	calc.	climate	PB4-1	0.235622014	9.113626782	PB4	S. pulchra	SPh-PB	In water	2nd
24	18-Jul-17	11:59:24	10	4.4	406	16	546	22	23.1	199	1005	304	8.81	0.82	32.03	343.770935	0.35	calc.	climate	PB4-1	0.238530928	9.317250744	PB4	S. pulchra	SPh-PB	In water	2nd
25	18-Jul-17	11:59:43	10.1	4.6	406	16	546	22.1	23.2	198.7	1005	304	9.07	0.85	32.77	343.770935	0.35	calc.	climate	PB4-1	0.247257669	9.532510362	PB4	S. pulchra	SPh-PB	In water	2nd
26	18-Jul-17	11:59:56	10.1	4.6	406	17	546	22.1	23.2	200.4	1005	305	9.1	0.86	32.98	343.770935	0.35	calc.	climate	PB4-1	0.250166583	9.593597551	PB4	S. pulchra	SPh-PB	In water	2nd
27	18-Jul-17	12:00:09	10.1	4.6	406	17	546	22.1	23.2	198.4	1005	304	9.16	0.87	33.54	343.770935	0.35	calc.	climate	PB4-1	0.253075496	9.756496721	PB4	S. pulchra	SPh-PB	In water	2nd
28	18-Jul-17	12:00:20	10.2	4.6	406	17	546	22.1	23.3	199	1005	301	9.1	0.84	33.71	343.770935	0.35	calc.	climate	PB4-1	0.244348755	9.805948254	PB4	S. pulchra	SPh-PB	In water	2nd
29	18-Jul-17	12:03:49	9.6	2.8	406	14	546	21.5	22.7	199	1005	266	5.45	0.41	27	315.4559938	0.35	calc.	climate	PB4-2	0.129970585	8.559038513	PB4	S. pulchra	SPh-PB	In water	2nd
30	18-Jul-17	12:04:01	9.6	2.9	406	14	546	21.5	22.6	200.4	1005	274	5.68	0.44	27.01	315.4559938	0.35	calc.	climate	PB4-2	0.139480628	8.562208527	PB4	S. pulchra	SPh-PB	In water	2nd
31	18-Jul-17	12:04:19	9.6	3	406	14	546	21.5	22.6	198.7	1005	279	6.02	0.47	27.37	315.4559938	0.35	calc.	climate	PB4-2	0.14899067	8.67632904	PB4	S. pulchra	SPh-PB	In water	2nd
32	18-Jul-17	12:04:28	9.6	3.1	406	14	546	21.5	22.6	198.7	1005	284	6.24	0.5	27.33	315.4559938	0.35	calc.	climate	PB4-2	0.158500713	8.663648983	PB4	S. pulchra	SPh-PB	In water	2nd
33	18-Jul-17	12:04:38	9.6	3.2	406	14	546	21.4	22.6	200.7	1005	287	6.33	0.51	26.95	315.4559938	0.35	calc.	climate	PB4-2	0.161670727	8.543188441	PB4	S. pulchra	SPh-PB	In water	2nd
34	18-Jul-17	12:04:47	9.6	3.2	406	14	546	21.4	22.5	198.7	1005	282	6.32	0.52	28.57	315.4559938	0.35	calc.	climate	PB4-2	0.164840742	9.056730752	PB4	S. pulchra	SPh-PB	In water	2nd
35	18-Jul-17	12:09:24	9.8	4.5	406	15	546	21.4	22.6	200.4	1005	318	8.93	0.9	29.44	462.7473912	0.35	calc.	climate	PB4-3	0.194490562	6.362002371	PB4	S. pulchra	SPh-PB	In water	2nd
36	18-Jul-17	12:09:39	9.8	4.6	406	15	546	21.4	22.6	198.7	1005	317	9.17	0.92	30.26	462.7473912	0.35	calc.	climate	PB4-3	0.198812574	6.539204883	PB4	S. pulchra	SPh-PB	In water	2nd
37	18-Jul-17	12:09:53	9.7	4.8	406	14	546	21.4	22.6	198.7	1005	325	9.5	0.99	28.61	462.7473912	0.35	calc.	climate	PB4-3	0.213939618	6.182638853	PB4	S. pulchra	SPh-PB	In water	2nd
38	18-Jul-17	12:13:46	10.2	4.7	405	17	546	21.7	22.9	199.4	1005	305	9.3	0.94	34.94	462.7473912	0.35	calc.	climate	PB4-3	0.203134587	7.550555803	PB4	S. pulchra	SPh-PB	In water	2nd
39	18-Jul-17	12:13:59	10.3	4.5	405	18	546	21.8	22.9	199.7	1005	295	8.86	0.88	36.83	462.7473912	0.35	calc.	climate	PB4-3	0.190168549	7.958985983	PB4	S. pulchra	SPh-PB	In water	2nd
40	18-Jul-17	12:14:10	10.3	4.5	405	18	546	21.8	23	200.7	1005	296	8.83	0.87	36.13	462.7473912	0.35	calc.	climate	PB4-3	0.188007543	7.807715546	PB4	S. pulchra	SPh-PB	In water	2nd
41	21-Jul-17	12:13:26	8.1	2.5	406	16	546	14.6	15.8	199.4	1014	314	5	0.89	31.57	479.770888	0.35	calc.	climate	PB4-1	0.185505211	6.580224184	PB4	S. pulchra	SPh-PB	Wet	3rd
42	21-Jul-17	12:13:36	8.1	2.6	406	16	546	14.6	15.8	199.7	1014	318	5.08	0.93	31.32	479.770888	0.35	calc.	climate	PB4-1	0.193842524	6.528115979	PB4	S. pulchra	SPh-PB	Wet	3rd
43	21-Jul-17	12:13:47	8.1	2.7	406	17	546	14.7	15.8	199	1014	314	5.36	1.01	34.08	479.770888	0.35	calc.	climate	PB4-1	0.21051715	7.103390567	PB4	S. pulchra	SPh-PB	Wet	3rd
44	21-Jul-17	12:13:59	8	2.7	406	17	546	14.6	15.8	200.4	1014	314	5.27	1.01	34.52	479.770888	0.35	calc.	climate	PB4-1	0.21051715	7.195101008	PB4	S. pulchra	SPh-PB	Wet	3rd
45	21-Jul-17	12:14:16	8	2.8	406	18	546	14.6	15.8	198.7	1014	313	5.48	1.08	36.26	479.770888	0.35	calc.	climate	PB4-1	0.225107448	7.557774118	PB4	S. pulchra	SPh-PB	Wet	3rd
46	21-Jul-17	12:14:27	8.1	2.9	406	19	546	14.6	15.8	198.7	1014	310	5.61	1.11	37.79	479.770888	0.35	calc.	climate	PB4-1	0.231360432	7.876676336	PB4	S. pulchra	SPh-PB	Wet	3rd
47	21-Jul-17	12:16:01	7.9	2.6	406	14	546	14.5	15.7	199.7	1014	329	5.07	0.94	27	521.0255608	0.35	calc.	climate	PB4-2	0.180413414	5.182087412	PB4	S. pulchra	SPh-PB	Wet	3rd
48	21-Jul-17	12:16:11	7.9	2.8	406	14	546	14.6	15.7	201	1014	334	5.53	1.06	27.12	521.0255608	0.35	calc.	climate	PB4-2	0.203444913	5.205118912	PB4	S. pulchra	SPh-PB	Wet	3rd
49	21-Jul-17	12:16:20	7.8	2.9	406	15	546	14.5	15.6	198.7	1014	331	5.67	1.15	29.79	521.0255608	0.35	calc.	climate	PB4-2	0.220718538	5.717569778	PB4	S. pulchra	SPh-PB	Wet	3rd
50	21-Jul-17	12:16:30	7.9	2.9	406	15	546	14.5	15.7	200	1014	330	5.68	1.13	29.97	521.0255608	0.35	calc.	climate	PB4-2	0.216879955	5.752117027	PB4	S. pulchra	SPh-PB	Wet	3rd
51	21-Jul-17	12:16:39	7.9	3	406	16	546	14.5	15.7	200	1014	329	5.86	1.2	31.75	521.0255608	0.35	calc.	climate	PB4-2	0.230314996	6.093750938	PB4	S. pulchra	SPh-PB	Wet	3rd
52	21-Jul-17	12:16:59	8	3	405	16	546	14.5	15.6	199	1014	326	5.79	1.21	32.62	521.0255608	0.35	calc.	climate	PB4-2	0.232234288	6.26072931	PB4	S. pulchra	SPh-PB	Wet	3rd
53	21-Jul-17	12:19:24	7.5	3.1	406	13	546	13.9	15.1	200.4	1014	349	6.14	1.45	25.67	559.5277344	0.35	calc.	climate	PB4-3	0.259147118	4.587797605	PB4	S. pulchra	SPh-PB	Wet	3rd
54	21-Jul-17	12:19:41	7.6	3.4	406	15	546	13.9	15	201	1014	343	6.64	1.69	30.81	559.5277344	0.35	calc.	climate	PB4-3	0.302040434	5.506429459	PB4	S. pulchra	SPh-PB	Wet	3rd
55	21-Jul-17	12:19:54	7.9	3.2	406	17	546	13.8	15	199.4	1014	337	6.38	1.6	33.21	559.5277344	0.35	calc.	climate	PB4-3	0.285955441	5.935362621	PB4	S. pulchra	SPh-PB	Wet	3rd
56	21-Jul-17	12:20:05	7.5	3	405	16	546	13.8	15	200	1014	336	5.88	1.44	31.71	559.5277344	0.35	calc.	climate	PB4-3	0.257359897	5.667279395	PB4	S. pulchra	SPh-PB	Wet	3rd
57	21-Jul-17	12:20:16	7.2	3.3	406	17	546	13.8	14.9	199.4	1014	337	6.57	1.76	34.69	559.5277344	0.35	calc.	climate	PB4-3	0.314550985	6.199871404	PB4	S. pulchra	SPh-PB	Wet	3rd
58	21-Jul-17	12:20:38	7.5	3.6	406	18	546	13.6	14.9	200.7	1014	339	7.19	2.04	36.03	559.5277344	0.35	calc.	climate	PB4-3	0.364593187	6.439359085	PB4	S. pulchra	SPh-PB	Wet	3rd
74	25-Jul-17	9:58:48	11.8	3.3	386	12	546	21.3	22.5	199.7	1011	298	6.53	0.66	23.78	479.770888	0.35	calc.	climate	PB4-1	0.137565662	4.956532502	PB4	S. pulchra	SPh-PB	Wet	4th
75	25-Jul-17	9:59:01	11.7	3.5	386	13	546	21.4	22.5	199.7	1011	298	6.86	0.73	25.63	479.770888	0.35	calc.	climate	PB4-1	0.15215596	5.342133223	PB4	S. pulchra	SPh-PB	Wet	4th
76	25-Jul-17	9:59:06	11.7	3.5	386	13	546	21.4	22.5	199.4	1011	298	6.86	0.73	25.63	479.770888	0.35	calc.	climate	PB4-1	0.15215596	5.342133223	PB4	S. pulchra	SPh-PB	Wet	4th
77	25-Jul-17	9:59:12	11.7	3.7	385	12	546	21.3	22.5	199.7	1011	305	7.23	0.79	24.47	479.770888	0.35	calc.	climate	PB4-1	0.164661929	5.100351149	PB4	S. pulchra	SPh-PB	Wet	4th
78	25-Jul-17	9:59:20	11.7	3.8	385	14	546	21.3	22.5	198.4	1011	297	7.51	0.84	28.4	479.770888	0.35	calc.	climate	PB4-1	0.17508357	5.919492139	PB4	S. pulchra	SPh-PB	Wet	4th
79	25-Jul-17	9:59:31	11.8	4	385	14	546	21.3	22.4	199.7	1011	301	7.81	0.91	28.7	479.770888	0.35	calc.	climate	PB4-1	0.189673868	5.982021985	PB4	S. pulchra	SPh-PB	Wet	4th
80	25-Jul-17	10:01:07	13.2	2.6	384	16	546	21.6	22.7	200.4	1011	243	5.12	0.5	32.6	521.0255608	0.35	calc.	climate	PB4-2	0.095964582	6.256890727	PB4	S. pulchra	SPh-PB	Wet	4th
81	25-Jul-17	10:01:16	13.4	2.7	384	20	546	21.7	22.8	198.7	1011	223	5.35	0.55	39.79	521.0255608	0.35	calc.	climate	PB4-2	0.10556104	7.636861412	PB4	S. pulchra	SPh-PB	Wet	4th
82	25-Jul-17	10:01:26	13.6	2.8	384	20	546	21.7	22.8	201.4	1011	232	5.51	0.58	39.25	521.0255608	0.35	calc.	climate	PB4-2	0.111318915	7.533219664	PB4	S. pulchra	SPh-PB	Wet	4th
83	25-Jul-17	10:01:34	13.9	2.9	384	22	546	21.7	22.8	199	1011	224	5.67	0.62	43.48	521.0255608	0.35	calc.	climate	PB4-2	0.118996081	8.345080025	PB4	S. pulchra	SPh-PB	Wet	4th
84	25-Jul-17	10:01:45	14.1	2.9	383	21	546	21.8	22.9	201.4	1011	230	5.67	0.63	42.06	521.0255608	0.35	calc.	climate	PB4-2	0.120915373	8.072540613	PB4	S. pulchra	SPh-PB	Wet	4th
85	25-Jul-17	10:01:54	14.3	2.9	383	23	546	21.8	23	198.7	1011	219	5.76	0.64	46.07	521.0255608	0.35	calc.	climate	PB4-2	0.122834665	8.842176558	PB4	S. pulchra	SPh-PB	Wet	4th
86	25-Jul-17	10:03:58	15.4	1.5	382	15	546	22.3	23.4	201.4	1011	169	2.87	0.26	29.65	559.5277344	0.35	calc.	climate	PB4-3	0.046467759	5.299111765	PB4	S. pulchra	SPh-PB	Wet	4th
87	25-Jul-17	10:04:06	15.4	1.9	382	17	546	22.3	23.4	198.7	1011	190	3.66	0.35	34.04	559.5277344	0.35	calc.	climate	PB4-3	0.062552753	6.083702006	PB4	S. pulchra	SPh-PB	Wet	4th
88	25-Jul-17	10:04:16	15.4	2.3	383	17	546	22.4	23.6	200	1011	218	4.44	0.44	34.37	559.5277344	0.35	calc.	climate	PB4-3	0.078637746	6.142680315	PB4	S. pulchra	SPh-PB	Wet	4th
89	25-Jul-17	10:04:25	15.4	2.6	383	18	546	22.4	23.6	198.7	1011	232	5.1	0.54	36.73	559.5277344	0.35	calc.	climate	PB4-3	0.096509961	6.564464591	PB4	S. pulchra	SPh-PB	Wet	4th
90	25-Jul-17	10:04:35	15.4	2.5	382	18	546	22.6	23.7	200	1011	230	4.96	0.52	36.44	559.5277344	0.35	calc.	climate	PB4-3	0.092935518	6.512635167	PB4	S. pulchra	SPh-PB	Wet	4th
91	25-Jul-17	10:04:46	15.3	2.8	382	19	546	22.5	23.7	199	1011	234	5.44	0.59	38.67	559.5277344	0.35	calc.	climate	PB4-3	0.105446069	6.911185563	PB4	S. pulchra	SPh-PB	Wet	4th
92	27-Jul-17	11:57:04	12.3	5.2	377	16	546	23.6	24.7	201.4	1000	287	10.34	1.02	32.68	479.770888	0.35	calc.	climate	PB4-1	0.212601478	6.811584616	PB4	S. pulchra	SPh-PB	Wet	5th
93	27-Jul-17	11:57:13	12.2	5.4	377	19	546	23.5	24.7	198	1000	281	10.81	1.11	37.07	479.770888	0.35	calc.	climate	PB4-1	0.231360432	7.726604704	PB4	S. pulchra	SPh-PB	Wet	5th
94	27-Jul-17	11:57:23	12.3	5.6	378	19	546	23.6	24.7	199.4	1000	282	11.26	1.18	37.9	479.770888	0.35	calc.	climate	PB4-1	0.24595073	7.899603946	PB4	S. pulchra	SPh-PB	Wet	5th
95	27-Jul-17	11:57:32	12.2	5.7	378	21	546	23.6	24.7	198.4	1000	276	11.26	1.2	41.24	479.770888	0.35	calc.	climate	PB4-1	0.250119386	8.595769571	PB4	S. pulchra	SPh-PB	Wet	5th
96	27-Jul-17	11:57:42	12.3	5.9	378	21	546	23.5	24.7	200.4	1000	279	11.74	1.28	41.16	479.770888	0.35	calc.	climate	PB4-1	0.266794012	8.579094945	PB4	S. pulchra	SPh-PB	Wet	5th
97	27-Jul-17	11:57:51	12.2	5.9	378	22	546	23.5	24.7	198.4	1000	275	11.7	1.29	43.28	479.770888	0.35	calc.	climate	PB4-1	0.26887834	9.020972527	PB4	S. pulchra	SPh-PB	Wet	5th
100	27-Jul-17	11:59:55	12	5.9	378	21	546	23	24.2	200.4	1000	281	11.73	1.38	42.16	521.0255608	0.35	calc.	climate	PB4-2	0.264862246	8.091733529	PB4	S. pulchra	SPh-PB	Wet	5th
101	27-Jul-17	12:00:04	11.8	5.8	378	23	546	23	24.1	199.7	1000	275	11.68	1.41	45.67	521.0255608	0.35	calc.	climate	PB4-2	0.27062012	8.765404893	PB4	S. pulchra	SPh-PB	Wet	5th
102	27-Jul-17	12:00:14	11.9	6.1	378	23	546	23	24.1	200.4	1000	278	12.08	1.49	45.78	521.0255608	0.35	calc.	climate	PB4-2	0.285974453	8.786517101	PB4	S. pulchra	SPh-PB	Wet	5th
103	27-Jul-17	12:00:23	11.9	6.1	378	24	546	22.9	24.1	198.4	1000	274	12.07	1.52	48.46	521.0255608	0.35	calc.	climate	PB4-2	0.291732328	9.300887259	PB4	S. pulchra	SPh-PB	Wet	5th
104	27-Jul-17	12:00:32	11.9	6.2	378	25	546	22.9	24	198.7	1000	277	12.39	1.64	48.8	521.0255608	0.35	calc.	climate	PB4-2	0.314763828	9.366143174	PB4	S. pulchra	SPh-PB	Wet	5th
105	27-Jul-17	12:00:41	11.8	6.2	378	26	546	22.9	24.1	199	1000	271	12.24	1.58	50.8	521.0255608	0.35	calc.	climate	PB4-2	0.303248078	9.750001501	PB4	S. pulchra	SPh-PB	Wet	5th
108	27-Jul-17	12:02:46	11.9	6.4	378	23	546	22.4	23.6	199.7	1000	291	12.83	1.97	45.51	559.5277344	0.35	calc.	climate	PB4-3	0.352082637	8.133645073	PB4	S. pulchra	SPh-PB	Wet	5th
109	27-Jul-17	12:02:55	11.9	6.2	378	25	546	22.4	23.6	199	1000	282	12.42	1.88	49.25	559.5277344	0.35	calc.	climate	PB4-3	0.335997643	8.802065916	PB4	S. pulchra	SPh-PB	Wet	5th
110	27-Jul-17	12:03:06	12	6.5	378	25	546	22.4	23.6	198.4	1000	286	12.96	2.07	48.97	559.5277344	0.35	calc.	climate	PB4-3	0.369954852	8.752023714	PB4	S. pulchra	SPh-PB	Wet	5th
111	27-Jul-17	12:03:14	11.8	6.5	378	26	546	22.3	23.5	199	1000	282	12.98	2.18	52.72	559.5277344	0.35	calc.	climate	PB4-3	0.389614288	9.422231778	PB4	S. pulchra	SPh-PB	Wet	5th
112	27-Jul-17	12:03:24	12	6.5	378	27	546	22.3	23.5	199.4	1000	281	12.89	2.14	52.98	559.5277344	0.35	calc.	climate	PB4-3	0.382465402	9.468699538	PB4	S. pulchra	SPh-PB	Wet	5th
113	27-Jul-17	12:03:33	12	6.5	378	28	546	22.3	23.5	198.7	1000	278	12.91	2.13	54.69	559.5277344	0.35	calc.	climate	PB4-3	0.380678181	9.774314415	PB4	S. pulchra	SPh-PB	Wet	5th
1	15-Jul-17	17:04:05	7.6	2.1	432	18	546	7.8	8.9	198	1018	390	4.09	under	36.61	638.8687598	0.35	calc.	climate	PC1-1		5.730441415	PC1	S. glauca	SPh-PC	Wet	1st
2	15-Jul-17	17:04:18	7.7	2	431	19	546	7.7	9	199.4	1019	387	4	9.48	37.74	638.8687598	0.35	calc.	climate	PC1-1	1.483872838	5.907316553	PC1	S. glauca	SPh-PC	Wet	1st
3	15-Jul-17	17:04:25	7.7	2	431	19	546	7.8	9	199	1018	387	4	9.48	37.74	638.8687598	0.35	calc.	climate	PC1-1	1.483872838	5.907316553	PC1	S. glauca	SPh-PC	Wet	1st
4	15-Jul-17	17:04:31	7.6	2.1	431	19	546	7.8	8.9	200.7	1018	389	4.05	under	37.35	638.8687598	0.35	calc.	climate	PC1-1		5.846271151	PC1	S. glauca	SPh-PC	Wet	1st
5	15-Jul-17	17:04:38	7.6	2	431	20	546	7.8	8.9	199.4	1018	384	3.98	under	40.33	638.8687598	0.35	calc.	climate	PC1-1		6.31272063	PC1	S. glauca	SPh-PC	Wet	1st
6	15-Jul-17	17:04:50	7.7	2	431	20	546	7.8	9	201	1018	384	4.01	under	40.27	638.8687598	0.35	calc.	climate	PC1-1		6.30332903	PC1	S. glauca	SPh-PC	Wet	1st
7	15-Jul-17	17:06:26	7.7	1.7	430	5	546	7.9	9.1	201	1018	415	3.35	3.4	9.71	528.5237802	0.35	calc.	climate	PC1-2	0.643301234	1.837192642	PC1	S. glauca	SPh-PC	Wet	1st
8	15-Jul-17	17:06:36	7.7	1.7	430	9	546	7.9	9.2	199.4	1018	403	3.27	3.05	17.36	528.5237802	0.35	calc.	climate	PC1-2	0.577079048	3.284620418	PC1	S. glauca	SPh-PC	Wet	1st
9	15-Jul-17	17:06:45	7.7	1.8	430	8	546	7.9	9.2	200.7	1018	405	3.44	3.66	16.26	528.5237802	0.35	calc.	climate	PC1-2	0.692494858	3.076493548	PC1	S. glauca	SPh-PC	Wet	1st
10	15-Jul-17	17:06:52	7.7	1.7	430	12	546	8	9.2	199.4	1018	395	3.41	3.67	23.7	528.5237802	0.35	calc.	climate	PC1-2	0.69438692	4.484188013	PC1	S. glauca	SPh-PC	Wet	1st
11	15-Jul-17	17:06:59	7.7	1.7	429	11	546	8	9.2	199.7	1018	396	3.41	3.68	22.82	528.5237802	0.35	calc.	climate	PC1-2	0.696278983	4.317686518	PC1	S. glauca	SPh-PC	Wet	1st
12	15-Jul-17	17:07:08	7.7	1.7	429	11	546	8	9.2	199.7	1018	396	3.41	3.68	22.82	528.5237802	0.35	calc.	climate	PC1-2	0.696278983	4.317686518	PC1	S. glauca	SPh-PC	Wet	1st
14	15-Jul-17	17:09:05	7.7	1.5	428	6	546	8	9.2	199.4	1018	407	3.02	2.35	11.75	431.2937668	0.35	calc.	climate	PC1-3	0.544872238	2.724361191	PC1	S. glauca	SPh-PC	Wet	1st
15	15-Jul-17	17:09:15	7.7	1.6	429	6	546	7.9	9.1	200.7	1018	408	3.12	2.7	12.24	431.2937668	0.35	calc.	climate	PC1-3	0.626023423	2.837972849	PC1	S. glauca	SPh-PC	Wet	1st
16	15-Jul-17	17:09:43	7.7	1.5	427	3	546	8	9.2	199.4	1018	416	2.99	2.26	5.52	431.2937668	0.35	calc.	climate	PC1-3	0.524004791	1.279870108	PC1	S. glauca	SPh-PC	Wet	1st
17	15-Jul-17	17:09:54	7.7	1.5	428	4	546	8	9.1	201	1018	413	3.03	2.43	8.48	431.2937668	0.35	calc.	climate	PC1-3	0.56342108	1.966177268	PC1	S. glauca	SPh-PC	Wet	1st
18	15-Jul-17	17:10:04	7.7	1.6	428	8	546	8	9.1	198.7	1019	402	3.07	2.46	15.05	431.2937668	0.35	calc.	climate	PC1-3	0.570376896	3.489500929	PC1	S. glauca	SPh-PC	Wet	1st
19	15-Jul-17	17:10:09	7.7	1.6	428	8	546	8	9.1	199.4	1018	402	3.07	2.46	15.05	431.2937668	0.35	calc.	climate	PC1-3	0.570376896	3.489500929	PC1	S. glauca	SPh-PC	Wet	1st
20	15-Jul-17	17:10:21	7.7	1.6	428	10	546	8	9.2	199	1019	394	3.14	2.7	20.8	431.2937668	0.35	calc.	climate	PC1-3	0.626023423	4.822698959	PC1	S. glauca	SPh-PC	Wet	1st
21	18-Jul-17	12:59:15	10.2	5.6	400	16	546	20.6	21.7	199	1003	336	11.04	1.73	30.86	638.8687598	0.35	calc.	climate	PC1-1	0.27079114	4.830413058	PC1	S. glauca	SPh-PC	Wet	2nd
22	18-Jul-17	12:59:25	10.1	5.8	400	20	546	20.8	21.7	198.7	1004	324	11.53	1.9	39.21	638.8687598	0.35	calc.	climate	PC1-1	0.297400674	6.137410759	PC1	S. glauca	SPh-PC	Wet	2nd
23	18-Jul-17	12:59:36	10.1	5.6	400	22	546	20.8	21.9	198.7	1004	309	11.19	1.68	44.36	638.8687598	0.35	calc.	climate	PC1-1	0.262964807	6.943523113	PC1	S. glauca	SPh-PC	Wet	2nd
24	18-Jul-17	12:59:48	10.2	5.8	400	22	546	20.8	21.9	200.4	1004	312	11.46	1.77	43.59	638.8687598	0.35	calc.	climate	PC1-1	0.277052207	6.822997577	PC1	S. glauca	SPh-PC	Wet	2nd
25	18-Jul-17	12:59:57	10.1	5.8	400	25	546	20.8	22	199	1004	299	11.43	1.74	50.27	638.8687598	0.35	calc.	climate	PC1-1	0.272356407	7.868595737	PC1	S. glauca	SPh-PC	Wet	2nd
26	18-Jul-17	13:00:06	10.1	6	399	25	546	20.8	22	198.7	1004	305	11.9	1.89	48.84	638.8687598	0.35	calc.	climate	PC1-1	0.295835408	7.644762598	PC1	S. glauca	SPh-PC	Wet	2nd
27	18-Jul-17	13:06:03	9.9	4	395	10	546	19.9	21	199.7	1004	334	7.84	0.92	20.36	528.5237802	0.35	calc.	climate	PC1-2	0.174069746	3.852239154	PC1	S. glauca	SPh-PC	Wet	2nd
28	18-Jul-17	13:06:13	10	4.2	395	10	546	20	21.1	198.7	1004	338	8.38	1.04	20.1	528.5237802	0.35	calc.	climate	PC1-2	0.196774495	3.80304553	PC1	S. glauca	SPh-PC	Wet	2nd
29	18-Jul-17	13:06:18	10.1	4.6	395	17	546	20.1	21.2	198.4	1004	313	9.04	1.2	32.99	528.5237802	0.35	calc.	climate	PC1-2	0.227047494	6.241914032	PC1	S. glauca	SPh-PC	Wet	2nd
30	18-Jul-17	13:06:27	10.1	4.8	395	16	546	20.1	21.2	200.7	1004	320	9.52	1.37	32.35	528.5237802	0.35	calc.	climate	PC1-2	0.259212556	6.120822035	PC1	S. glauca	SPh-PC	Wet	2nd
31	18-Jul-17	13:06:35	10.3	5	395	20	546	20.2	21.3	198.7	1004	305	9.84	1.43	40.14	528.5237802	0.35	calc.	climate	PC1-2	0.270564931	7.594738686	PC1	S. glauca	SPh-PC	Wet	2nd
32	18-Jul-17	13:06:46	10.2	5.1	394	19	546	20.3	21.4	198.7	1004	310	10.17	1.54	38.7	528.5237802	0.35	calc.	climate	PC1-2	0.291377618	7.322281693	PC1	S. glauca	SPh-PC	Wet	2nd
34	18-Jul-17	13:09:00	10.7	6.3	394	27	546	21.4	22.5	200.7	1004	294	12.5	2.12	54.57	962.9809319	0.35	calc.	climate	PC1-3	0.220149738	5.666778873	PC1	S. glauca	SPh-PC	Wet	2nd
35	18-Jul-17	13:09:11	10.8	6.6	394	30	546	21.5	22.5	199	1004	290	13.14	2.43	60.08	962.9809319	0.35	calc.	climate	PC1-3	0.252341445	6.238960504	PC1	S. glauca	SPh-PC	Wet	2nd
36	18-Jul-17	13:09:18	10.8	6.7	393	30	546	21.5	22.6	201.4	1004	291	13.26	2.46	59.62	962.9809319	0.35	calc.	climate	PC1-3	0.255456772	6.191192164	PC1	S. glauca	SPh-PC	Wet	2nd
37	18-Jul-17	13:09:28	10.9	7.1	393	35	546	21.6	22.7	199	1004	281	14	2.82	69.32	962.9809319	0.35	calc.	climate	PC1-3	0.292840689	7.198481061	PC1	S. glauca	SPh-PC	Wet	2nd
38	18-Jul-17	13:09:37	10.9	7.2	393	35	546	21.6	22.8	201.4	1004	285	14.22	3.02	68.79	962.9809319	0.35	calc.	climate	PC1-3	0.313609533	7.143443626	PC1	S. glauca	SPh-PC	Wet	2nd
39	21-Jul-17	10:39:52	6.7	2.4	420	12	546	10.8	11.9	201	1013	367	4.73	1.47	24.61	638.8687598	0.35	calc.	climate	PC1-1	0.230094206	3.852121366	PC1	S. glauca	SPh-PC	Wet	3rd
40	21-Jul-17	10:40:00	6.6	2.6	420	18	546	10.8	11.9	199.4	1012	352	5.11	1.77	34.94	638.8687598	0.35	calc.	climate	PC1-1	0.277052207	5.469041875	PC1	S. glauca	SPh-PC	Wet	3rd
41	21-Jul-17	10:40:08	6.7	2.8	420	17	546	10.8	11.9	200	1013	358	5.42	2.08	34.15	638.8687598	0.35	calc.	climate	PC1-1	0.325575475	5.345385805	PC1	S. glauca	SPh-PC	Wet	3rd
42	21-Jul-17	10:40:18	6.7	2.9	420	21	546	10.8	12	199.4	1012	350	5.77	2.4	40.83	638.8687598	0.35	calc.	climate	PC1-1	0.37566401	6.390983966	PC1	S. glauca	SPh-PC	Wet	3rd
43	21-Jul-17	10:40:27	6.7	3.1	421	21	546	10.9	12	200.4	1013	352	6.04	2.8	42.62	638.8687598	0.35	calc.	climate	PC1-1	0.438274678	6.671166706	PC1	S. glauca	SPh-PC	Wet	3rd
44	21-Jul-17	10:40:37	6.7	3.2	421	24	546	10.9	12	198.4	1013	348	6.24	3.15	47.69	638.8687598	0.35	calc.	climate	PC1-1	0.493059013	7.464756927	PC1	S. glauca	SPh-PC	Wet	3rd
45	21-Jul-17	10:46:47	7.3	2.8	418	20	546	12	13.2	200	1012	340	5.59	1.79	40.43	538.9631618	0.35	calc.	climate	PC1-2	0.332119174	7.501440333	PC1	S. glauca	SPh-PC	Wet	3rd
46	21-Jul-17	10:46:57	7.3	3	418	23	546	12.1	13.2	199	1012	338	5.96	2.14	45.26	538.9631618	0.35	calc.	climate	PC1-2	0.397058677	8.397605478	PC1	S. glauca	SPh-PC	Wet	3rd
47	21-Jul-17	10:47:08	7.3	3.1	419	23	546	12.1	13.2	200	1012	338	6.03	2.23	45.93	538.9631618	0.35	calc.	climate	PC1-2	0.413757406	8.521918241	PC1	S. glauca	SPh-PC	Wet	3rd
48	21-Jul-17	10:47:26	7.3	3.2	419	24	546	12.1	13.2	199.4	1012	338	6.26	2.49	48.1	538.9631618	0.35	calc.	climate	PC1-2	0.46199818	8.924543162	PC1	S. glauca	SPh-PC	Wet	3rd
49	21-Jul-17	10:47:36	7.3	3.2	419	26	546	12.1	13.2	198.7	1013	335	6.36	2.6	50.9	538.9631618	0.35	calc.	climate	PC1-2	0.482407738	9.444059188	PC1	S. glauca	SPh-PC	Wet	3rd
50	21-Jul-17	10:47:45	7.3	3.3	418	25	546	12.1	13.2	200.7	1012	337	6.41	2.7	49.91	538.9631618	0.35	calc.	climate	PC1-2	0.500961882	9.260373164	PC1	S. glauca	SPh-PC	Wet	3rd
51	21-Jul-17	10:50:26	7.3	4	418	38	546	12.1	13.2	199	1013	325	7.96	7.31	75.56	962.9809319	0.35	calc.	climate	PC1-3	0.75910122	7.846468969	PC1	S. glauca	SPh-PC	Wet	3rd
52	21-Jul-17	10:50:45	7.3	4.2	418	40	546	12.1	13.3	198.7	1012	323	8.15	8.95	80.24	962.9809319	0.35	calc.	climate	PC1-3	0.929405734	8.3324599	PC1	S. glauca	SPh-PC	Wet	3rd
53	21-Jul-17	10:50:56	7.3	4.3	418	40	546	12.1	13.2	199	1012	327	8.38	under	80.03	962.9809319	0.35	calc.	climate	PC1-3		8.310652615	PC1	S. glauca	SPh-PC	Wet	3rd
54	21-Jul-17	10:51:28	7.3	4	417	43	546	12	13.2	199	1012	313	7.88	7.09	84.37	962.9809319	0.35	calc.	climate	PC1-3	0.736255492	8.761336513	PC1	S. glauca	SPh-PC	Wet	3rd
55	21-Jul-17	10:52:26	7.3	4	417	30	546	12.1	13.3	198.7	1012	341	7.88	6.23	60.18	962.9809319	0.35	calc.	climate	PC1-3	0.646949466	6.249344925	PC1	S. glauca	SPh-PC	Wet	3rd
56	21-Jul-17	10:52:41	7.2	4.1	417	35	546	12.1	13.2	199	1013	335	8.16	9.27	69.92	962.9809319	0.35	calc.	climate	PC1-3	0.962635883	7.26078759	PC1	S. glauca	SPh-PC	Wet	3rd
57	21-Jul-17	10:52:52	7.3	4.2	418	35	546	12.1	13.2	201	1012	336	8.24	under	70.23	962.9809319	0.35	calc.	climate	PC1-3		7.292979297	PC1	S. glauca	SPh-PC	Wet	3rd
58	21-Jul-17	10:53:00	7.2	4.2	418	39	546	12.1	13.3	199.4	1013	327	8.25	9.89	77.99	962.9809319	0.35	calc.	climate	PC1-3	1.027019297	8.098810414	PC1	S. glauca	SPh-PC	Wet	3rd
59	21-Jul-17	10:53:08	7.4	4.4	417	38	546	12.1	13.3	199	1012	332	8.59	under	76.4	962.9809319	0.35	calc.	climate	PC1-3		7.933698111	PC1	S. glauca	SPh-PC	Wet	3rd
60	21-Jul-17	10:53:33	7.3	4.4	417	41	546	12.1	13.2	200	1012	329	8.63	under	81.96	962.9809319	0.35	calc.	climate	PC1-3		8.511071952	PC1	S. glauca	SPh-PC	Wet	3rd
95	25-Jul-17	12:53:29	19.4	1.3	383	14	546	20.9	22	198	1009	270	2.59	0.52	27.02	638.8687598	0.35	calc.	climate	PC1-1	0.081393869	4.229350643	PC1	S. glauca	SPh-PC	Wet	4th
96	25-Jul-17	12:53:36	19.4	1.6	383	13	546	20.8	22	200.7	1009	295	3.17	0.73	26.85	638.8687598	0.35	calc.	climate	PC1-1	0.11426447	4.202741109	PC1	S. glauca	SPh-PC	Wet	4th
97	25-Jul-17	12:53:42	19.4	1.7	383	14	546	20.8	22	200	1009	296	3.27	0.77	27.44	638.8687598	0.35	calc.	climate	PC1-1	0.120525536	4.295091845	PC1	S. glauca	SPh-PC	Wet	4th
98	25-Jul-17	12:53:51	19.3	1.8	383	14	546	20.7	21.9	199.4	1009	307	3.63	0.93	27.01	638.8687598	0.35	calc.	climate	PC1-1	0.145569804	4.227785376	PC1	S. glauca	SPh-PC	Wet	4th
99	25-Jul-17	12:54:00	19.3	1.9	383	15	546	20.8	21.9	199.7	1008	304	3.82	1.01	29.58	638.8687598	0.35	calc.	climate	PC1-1	0.158091937	4.63005892	PC1	S. glauca	SPh-PC	Wet	4th
100	25-Jul-17	12:54:10	19.1	2.2	383	15	546	20.7	21.8	198.7	1009	314	4.24	1.27	29.19	638.8687598	0.35	calc.	climate	PC1-1	0.198788872	4.569013518	PC1	S. glauca	SPh-PC	Wet	4th
101	25-Jul-17	13:04:04	19.1	1.2	385	15	546	21.6	22.8	200.7	1008	220	2.43	0.36	29.76	538.9631618	0.35	calc.	climate	PC1-2	0.066794918	5.521713191	PC1	S. glauca	SPh-PC	Wet	4th
102	25-Jul-17	13:04:10	19	1.3	385	15	546	21.6	22.7	198.7	1008	234	2.66	0.42	30.62	538.9631618	0.35	calc.	climate	PC1-2	0.077927404	5.681278828	PC1	S. glauca	SPh-PC	Wet	4th
103	25-Jul-17	13:04:18	19	1.4	385	16	546	21.6	22.7	199.4	1008	242	2.85	0.46	31.19	538.9631618	0.35	calc.	climate	PC1-2	0.085349061	5.787037447	PC1	S. glauca	SPh-PC	Wet	4th
104	25-Jul-17	13:04:24	19	1.4	385	16	546	21.6	22.7	198.7	1008	242	2.85	0.46	31.19	538.9631618	0.35	calc.	climate	PC1-2	0.085349061	5.787037447	PC1	S. glauca	SPh-PC	Wet	4th
105	25-Jul-17	13:04:38	19.1	1.6	385	15	546	21.6	22.8	199.7	1009	259	3.23	0.53	30.45	538.9631618	0.35	calc.	climate	PC1-2	0.098336962	5.649736783	PC1	S. glauca	SPh-PC	Wet	4th
106	25-Jul-17	13:04:44	19.1	1.6	385	15	546	21.7	22.8	199	1008	259	3.23	0.53	30.45	538.9631618	0.35	calc.	climate	PC1-2	0.098336962	5.649736783	PC1	S. glauca	SPh-PC	Wet	4th
107	25-Jul-17	13:04:50	19.2	1.6	385	16	546	21.7	22.8	199.4	1009	253	3.15	0.52	31.42	538.9631618	0.35	calc.	climate	PC1-2	0.096481548	5.829711978	PC1	S. glauca	SPh-PC	Wet	4th
109	25-Jul-17	13:06:42	18.7	2.2	385	16	546	21.6	22.8	199	1009	284	4.35	0.8	32.81	758.6813951	0.35	calc.	climate	PC1-3	0.105446108	4.324608487	PC1	S. glauca	SPh-PC	Wet	4th
110	25-Jul-17	13:06:54	18.9	2.4	385	17	546	21.6	22.8	200.7	1009	296	4.78	1	32.98	758.6813951	0.35	calc.	climate	PC1-3	0.131807634	4.347015785	PC1	S. glauca	SPh-PC	Wet	4th
111	25-Jul-17	13:07:01	19	2.6	385	24	546	21.7	22.8	199	1009	272	5.21	1.21	47.84	758.6813951	0.35	calc.	climate	PC1-3	0.159487238	6.305677233	PC1	S. glauca	SPh-PC	Wet	4th
112	25-Jul-17	13:07:12	19.2	2.8	384	23	546	21.7	22.8	198.7	1008	285	5.6	1.41	45.35	758.6813951	0.35	calc.	climate	PC1-3	0.185848765	5.977476223	PC1	S. glauca	SPh-PC	Wet	4th
113	25-Jul-17	13:07:21	19.2	3.1	384	27	546	21.7	22.9	199.4	1009	275	6.1	1.64	54	758.6813951	0.35	calc.	climate	PC1-3	0.216164521	7.117612261	PC1	S. glauca	SPh-PC	Wet	4th
114	25-Jul-17	13:07:31	19.2	3.3	384	27	546	21.7	22.9	199	1008	282	6.43	1.91	54.34	758.6813951	0.35	calc.	climate	PC1-3	0.251752582	7.162426857	PC1	S. glauca	SPh-PC	Wet	4th
115	25-Jul-17	13:07:40	18.9	3.6	384	31	546	21.8	22.9	198.4	1009	281	7.12	2.45	61.54	758.6813951	0.35	calc.	climate	PC1-3	0.322928704	8.111441825	PC1	S. glauca	SPh-PC	Wet	4th
116	25-Jul-17	13:07:51	18.9	3.5	384	32	546	21.8	22.9	200.7	1008	273	7	2.13	62.78	758.6813951	0.35	calc.	climate	PC1-3	0.280750261	8.274883292	PC1	S. glauca	SPh-PC	Wet	4th
117	25-Jul-17	13:07:59	18.7	3.7	384	33	546	21.8	22.9	198.7	1009	271	7.38	2.35	66.54	758.6813951	0.35	calc.	climate	PC1-3	0.309747941	8.770479997	PC1	S. glauca	SPh-PC	Wet	4th
118	25-Jul-17	13:08:08	18.8	3.7	384	33	546	21.8	22.9	199.4	1009	276	7.41	2.52	65.48	758.6813951	0.35	calc.	climate	PC1-3	0.332155239	8.630763905	PC1	S. glauca	SPh-PC	Wet	4th
119	25-Jul-17	13:08:49	18.3	4.2	384	36	546	21.6	22.7	200.4	1009	279	8.16	3.56	71.97	758.6813951	0.35	calc.	climate	PC1-3	0.469235179	9.486195452	PC1	S. glauca	SPh-PC	Wet	4th
121	27-Jul-17	10:08:17	12.9	3.3	389	8	546	20.5	21.7	200.4	998	338	6.48	0.85	15.83	638.8687598	0.35	calc.	climate	PC1-1	0.13304767	2.477817198	PC1	S. glauca	SPh-PC	Wet	5th
122	27-Jul-17	10:08:26	13	3.3	389	9	546	20.6	21.7	198.7	998	332	6.58	0.86	18.38	638.8687598	0.35	calc.	climate	PC1-1	0.134612937	2.876960208	PC1	S. glauca	SPh-PC	Wet	5th
123	27-Jul-17	10:08:35	13	3.2	389	9	546	20.6	21.7	200.4	998	332	6.41	0.84	17.76	638.8687598	0.35	calc.	climate	PC1-1	0.131482403	2.779913672	PC1	S. glauca	SPh-PC	Wet	5th
124	27-Jul-17	10:08:44	13	3.3	389	10	546	20.6	21.7	199	998	327	6.7	0.9	20.24	638.8687598	0.35	calc.	climate	PC1-1	0.140874004	3.168099815	PC1	S. glauca	SPh-PC	Wet	5th
125	27-Jul-17	10:09:03	12.9	3.5	389	11	546	20.5	21.7	199	998	326	7.03	0.97	21.93	638.8687598	0.35	calc.	climate	PC1-1	0.151830871	3.432629889	PC1	S. glauca	SPh-PC	Wet	5th
126	27-Jul-17	10:09:13	12.4	3.6	388	11	546	20.6	21.7	201	998	330	7.25	1.04	21.25	638.8687598	0.35	calc.	climate	PC1-1	0.162787738	3.326191753	PC1	S. glauca	SPh-PC	Wet	5th
127	27-Jul-17	10:12:46	13	4.1	388	8	546	21	22.2	201.7	998	345	8.25	1.13	15.33	538.9631618	0.35	calc.	climate	PC1-2	0.209661825	2.844350243	PC1	S. glauca	SPh-PC	Wet	5th
128	27-Jul-17	10:12:51	13.5	3.6	388	11	546	21	22.2	199	998	325	7.22	0.92	21.09	538.9631618	0.35	calc.	climate	PC1-2	0.170698123	3.913068925	PC1	S. glauca	SPh-PC	Wet	5th
129	27-Jul-17	10:13:02	12.8	3.2	387	10	546	21	22.2	199.4	998	325	6.43	0.81	19	538.9631618	0.35	calc.	climate	PC1-2	0.150288565	3.52528732	PC1	S. glauca	SPh-PC	Wet	5th
130	27-Jul-17	10:13:10	12.3	3.8	387	12	546	21.1	22.2	199	998	319	7.61	0.98	23.93	538.9631618	0.35	calc.	climate	PC1-2	0.181830609	4.440006608	PC1	S. glauca	SPh-PC	Wet	5th
131	27-Jul-17	10:13:21	12.7	4.3	387	13	546	21.1	22.2	199	998	322	8.53	1.14	24.98	538.9631618	0.35	calc.	climate	PC1-2	0.211517239	4.634825118	PC1	S. glauca	SPh-PC	Wet	5th
132	27-Jul-17	10:13:29	13.1	3.9	387	13	546	21.1	22.3	199.4	998	313	7.76	0.99	26.52	538.9631618	0.35	calc.	climate	PC1-2	0.183686023	4.920558932	PC1	S. glauca	SPh-PC	Wet	5th
133	27-Jul-17	10:13:43	12.5	3.3	386	13	546	21.1	22.3	200.7	998	306	6.69	0.81	25.17	538.9631618	0.35	calc.	climate	PC1-2	0.150288565	4.670077991	PC1	S. glauca	SPh-PC	Wet	5th
134	27-Jul-17	10:13:54	12	3.8	386	13	546	21.1	22.3	199	998	310	7.65	0.95	26.65	538.9631618	0.35	calc.	climate	PC1-2	0.176264366	4.944679319	PC1	S. glauca	SPh-PC	Wet	5th
135	27-Jul-17	10:14:02	12.5	4.1	387	14	546	21.1	22.3	201	998	312	8.29	1.05	27.43	538.9631618	0.35	calc.	climate	PC1-2	0.19481851	5.089401641	PC1	S. glauca	SPh-PC	Wet	5th
136	27-Jul-17	10:14:13	13	3.6	387	14	546	21.2	22.3	199.4	998	304	7.17	0.85	27.13	538.9631618	0.35	calc.	climate	PC1-2	0.157710222	5.033739209	PC1	S. glauca	SPh-PC	Wet	5th
137	27-Jul-17	10:17:30	13.1	6.1	384	24	546	21.6	22.7	200	998	309	12.06	3.13	47.46	644.6206295	0.35	calc.	climate	PC1-3	0.485556908	7.362469929	PC1	S. glauca	SPh-PC	Wet	5th
138	27-Jul-17	10:17:37	13.1	6.7	384	26	546	21.6	22.7	199	998	307	13.25	3.94	52.36	644.6206295	0.35	calc.	climate	PC1-3	0.611212211	8.122606942	PC1	S. glauca	SPh-PC	Wet	5th
139	27-Jul-17	10:17:46	12.9	6.8	384	26	546	21.5	22.7	199.4	998	310	13.65	4.53	52.55	644.6206295	0.35	calc.	climate	PC1-3	0.702738912	8.152081642	PC1	S. glauca	SPh-PC	Wet	5th
140	27-Jul-17	10:17:56	13	7	384	28	546	21.5	22.7	199.4	998	307	13.98	4.65	54.95	644.6206295	0.35	calc.	climate	PC1-3	0.721354513	8.524393649	PC1	S. glauca	SPh-PC	Wet	5th
141	27-Jul-17	10:18:07	12.8	7.1	384	27	546	21.6	22.7	200.4	998	310	14.18	5.3	54.53	644.6206295	0.35	calc.	climate	PC1-3	0.822189014	8.459239048	PC1	S. glauca	SPh-PC	Wet	5th
142	27-Jul-17	10:18:15	12.9	7.2	384	28	546	21.5	22.7	199	998	308	14.34	5.16	55.96	644.6206295	0.35	calc.	climate	PC1-3	0.800470814	8.681074952	PC1	S. glauca	SPh-PC	Wet	5th
1	15-Jul-17	17:14:21	7.8	1.5	427	3	546	8.3	9.5	200.7	1019	413	2.97	1.99	6.92	474.4069688	0.35	calc.	climate	PC2-1	0.419471072	1.458663227	PC2	S. glauca	SPh-PC	Wet	1st
2	15-Jul-17	17:14:30	7.8	1.5	427	7	546	8.3	9.4	199.4	1019	400	2.98	2.06	14.4	474.4069688	0.35	calc.	climate	PC2-1	0.434226336	3.035368565	PC2	S. glauca	SPh-PC	Wet	1st
3	15-Jul-17	17:14:39	7.8	1.5	427	7	546	8.3	9.5	198	1019	399	2.89	1.86	13.87	474.4069688	0.35	calc.	climate	PC2-1	0.39206844	2.923650138	PC2	S. glauca	SPh-PC	Wet	1st
4	15-Jul-17	17:14:46	7.9	1.5	427	10	546	8.3	9.5	199.4	1019	388	2.92	1.86	20.2	474.4069688	0.35	calc.	climate	PC2-1	0.39206844	4.25794757	PC2	S. glauca	SPh-PC	Wet	1st
5	15-Jul-17	17:14:53	7.8	1.5	427	10	546	8.4	9.5	199	1019	388	2.92	1.86	20.2	474.4069688	0.35	calc.	climate	PC2-1	0.39206844	4.25794757	PC2	S. glauca	SPh-PC	Wet	1st
6	15-Jul-17	17:14:58	7.8	1.5	426	10	546	8.3	9.5	199.4	1019	389	2.97	2.01	19.96	474.4069688	0.35	calc.	climate	PC2-1	0.423686862	4.207358094	PC2	S. glauca	SPh-PC	Wet	1st
7	15-Jul-17	17:15:55	7.9	1.7	427	12	546	8.4	9.6	201	1019	388	3.31	2.72	23.72	751.3613511	0.35	calc.	climate	PC2-2	0.36200957	3.156936402	PC2	S. glauca	SPh-PC	Wet	1st
8	15-Jul-17	17:16:04	7.9	1.8	427	16	546	8.4	9.6	199.7	1019	379	3.48	3.36	32	751.3613511	0.35	calc.	climate	PC2-2	0.447188293	4.258936123	PC2	S. glauca	SPh-PC	Wet	1st
9	15-Jul-17	17:16:15	8	1.8	426	16	546	8.5	9.6	200.4	1019	381	3.58	3.84	31.45	751.3613511	0.35	calc.	climate	PC2-2	0.511072335	4.185735659	PC2	S. glauca	SPh-PC	Wet	1st
10	15-Jul-17	17:16:34	7.9	2	426	18	546	8.5	9.6	200.7	1019	378	3.85	5.5	36.34	751.3613511	0.35	calc.	climate	PC2-2	0.732004646	4.836554335	PC2	S. glauca	SPh-PC	Wet	1st
11	15-Jul-17	17:16:43	8	1.9	426	21	546	8.5	9.6	199.4	1019	370	3.82	4.97	41.94	751.3613511	0.35	calc.	climate	PC2-2	0.661466017	5.581868157	PC2	S. glauca	SPh-PC	Wet	1st
12	15-Jul-17	17:16:56	8	2	426	21	546	8.5	9.7	198.7	1019	371	3.9	5.37	41.53	751.3613511	0.35	calc.	climate	PC2-2	0.714702718	5.527300538	PC2	S. glauca	SPh-PC	Wet	1st
13	15-Jul-17	17:18:31	8.1	1.5	426	6	546	8.7	9.9	199.7	1019	404	2.92	1.89	11.25	919.3858465	0.35	calc.	climate	PC2-3	0.205572014	1.22364294	PC2	S. glauca	SPh-PC	Wet	1st
14	15-Jul-17	17:18:46	8.1	1.5	426	8	546	8.7	9.9	200.4	1019	395	3	2.03	16.19	919.3858465	0.35	calc.	climate	PC2-3	0.22079957	1.760958151	PC2	S. glauca	SPh-PC	Wet	1st
15	15-Jul-17	17:18:55	8.1	1.6	426	15	546	8.6	9.9	200	1019	375	3.09	2.23	29.11	919.3858465	0.35	calc.	climate	PC2-3	0.242553223	3.166244087	PC2	S. glauca	SPh-PC	Wet	1st
16	15-Jul-17	17:19:05	8.1	1.6	425	14	546	8.6	9.8	200.7	1019	376	3.1	2.39	28.79	919.3858465	0.35	calc.	climate	PC2-3	0.259956145	3.131438243	PC2	S. glauca	SPh-PC	Wet	1st
17	15-Jul-17	17:19:14	8.2	1.7	425	19	546	8.8	9.9	199.7	1019	363	3.26	2.46	37.47	919.3858465	0.35	calc.	climate	PC2-3	0.267569923	4.075546751	PC2	S. glauca	SPh-PC	Wet	1st
18	15-Jul-17	17:19:25	8.1	1.7	425	19	546	8.7	9.9	200	1019	368	3.36	2.97	36.9	919.3858465	0.35	calc.	climate	PC2-3	0.323041736	4.013548842	PC2	S. glauca	SPh-PC	Wet	1st
19	18-Jul-17	13:23:45	7.9	4	390	15	546	21.1	22.3	199	1004	283	7.99	0.65	28.81	489.5475217	0.35	calc.	climate	PC2-1	0.13277567	5.885026218	PC2	S. glauca	SPh-PC	Wet	2nd
20	18-Jul-17	13:23:58	7.8	4.2	389	14	546	21.1	22.3	200.4	1004	287	8.27	0.69	28.55	489.5475217	0.35	calc.	climate	PC2-1	0.14094648	5.83191595	PC2	S. glauca	SPh-PC	Wet	2nd
21	18-Jul-17	13:24:06	8	4.4	389	17	546	21.1	22.2	199.4	1005	279	8.74	0.75	33.03	489.5475217	0.35	calc.	climate	PC2-1	0.153202696	6.747046719	PC2	S. glauca	SPh-PC	Wet	2nd
22	18-Jul-17	13:24:17	7.9	4.4	389	16	546	21.1	22.2	200.4	1004	281	8.82	0.76	32.72	489.5475217	0.35	calc.	climate	PC2-1	0.155245398	6.683722938	PC2	S. glauca	SPh-PC	Wet	2nd
23	18-Jul-17	13:24:28	7.9	4.4	389	18	546	21.1	22.2	198.4	1004	274	8.8	0.77	35.43	489.5475217	0.35	calc.	climate	PC2-1	0.157288101	7.237295345	PC2	S. glauca	SPh-PC	Wet	2nd
24	18-Jul-17	13:24:34	7.8	4.5	388	17	546	21	22.2	200.7	1005	279	8.99	0.79	34.03	489.5475217	0.35	calc.	climate	PC2-1	0.161373506	6.95131698	PC2	S. glauca	SPh-PC	Wet	2nd
25	18-Jul-17	13:26:37	8.5	4.9	389	19	546	21.2	22.3	199.7	1005	283	9.62	0.94	36.84	751.3613511	0.35	calc.	climate	PC2-2	0.125106249	4.903100212	PC2	S. glauca	SPh-PC	Wet	2nd
26	18-Jul-17	13:26:46	8.5	5.2	389	19	546	21.3	22.4	201	1004	288	10.32	1.04	37.29	751.3613511	0.35	calc.	climate	PC2-2	0.138415424	4.962991501	PC2	S. glauca	SPh-PC	Wet	2nd
27	18-Jul-17	13:26:54	8.6	5.5	389	23	546	21.3	22.4	198.7	1005	276	10.99	1.17	45.36	751.3613511	0.35	calc.	climate	PC2-2	0.155717352	6.037041955	PC2	S. glauca	SPh-PC	Wet	2nd
28	18-Jul-17	13:27:04	8.6	5.6	389	22	546	21.4	22.5	198.7	1004	279	11.08	1.2	44.69	751.3613511	0.35	calc.	climate	PC2-2	0.159710105	5.94787048	PC2	S. glauca	SPh-PC	Wet	2nd
29	18-Jul-17	13:27:13	8.5	5.7	389	25	546	21.4	22.5	199	1004	272	11.36	1.26	49.07	751.3613511	0.35	calc.	climate	PC2-2	0.16769561	6.530812362	PC2	S. glauca	SPh-PC	Wet	2nd
30	18-Jul-17	13:27:23	8.6	5.9	388	24	546	21.5	22.6	200.7	1004	277	11.74	1.32	47.66	751.3613511	0.35	calc.	climate	PC2-2	0.175681115	6.343152989	PC2	S. glauca	SPh-PC	Wet	2nd
31	18-Jul-17	13:28:32	9.1	4.4	388	19	546	21.7	22.8	199.4	1004	263	8.68	0.76	38.31	919.3858465	0.35	calc.	climate	PC2-3	0.082663879	4.166912091	PC2	S. glauca	SPh-PC	Wet	2nd
32	18-Jul-17	13:28:40	8.9	5	389	20	546	21.7	22.8	200.4	1004	278	9.97	0.96	39.23	919.3858465	0.35	calc.	climate	PC2-3	0.104417531	4.266978891	PC2	S. glauca	SPh-PC	Wet	2nd
33	18-Jul-17	13:28:49	9	5.4	389	25	546	21.7	22.9	199	1004	256	10.64	1.06	50.66	919.3858465	0.35	calc.	climate	PC2-3	0.115294357	5.510200118	PC2	S. glauca	SPh-PC	Wet	2nd
34	18-Jul-17	13:28:59	9.1	5.7	389	26	546	21.8	22.9	199	1004	262	11.24	1.17	51.19	919.3858465	0.35	calc.	climate	PC2-3	0.127258866	5.567847297	PC2	S. glauca	SPh-PC	Wet	2nd
35	18-Jul-17	13:29:08	9	5.9	389	28	546	21.8	22.9	199	1004	257	11.72	1.29	56.8	919.3858465	0.35	calc.	climate	PC2-3	0.140311057	6.178037243	PC2	S. glauca	SPh-PC	Wet	2nd
36	18-Jul-17	13:29:19	9.1	6.2	388	28	546	21.8	23	201	1004	264	12.33	1.4	55.5	919.3858465	0.35	calc.	climate	PC2-3	0.152275566	6.036638503	PC2	S. glauca	SPh-PC	Wet	2nd
37	21-Jul-17	10:05:27	7.2	1.9	422	18	546	10.3	11.5	199	1013	337	3.83	1.21	36.02	489.5475217	0.35	calc.	climate	PC2-1	0.247167016	7.357814799	PC2	S. glauca	SPh-PC	Wet	3rd
38	21-Jul-17	10:05:32	7.1	2.1	422	18	546	10.3	11.5	200	1013	341	4.03	1.35	36.23	489.5475217	0.35	calc.	climate	PC2-1	0.275764852	7.400711554	PC2	S. glauca	SPh-PC	Wet	3rd
39	21-Jul-17	10:05:41	7	2.1	422	18	546	10.4	11.5	199	1013	345	4.23	1.48	36.43	489.5475217	0.35	calc.	climate	PC2-1	0.302319986	7.441565606	PC2	S. glauca	SPh-PC	Wet	3rd
40	21-Jul-17	10:05:52	7.1	2.1	422	17	546	10.4	11.5	199	1013	345	4.11	1.38	34.81	489.5475217	0.35	calc.	climate	PC2-1	0.28189296	7.110647783	PC2	S. glauca	SPh-PC	Wet	3rd
41	21-Jul-17	10:06:00	7.1	2.2	422	17	546	10.4	11.6	198.7	1013	349	4.26	1.44	33.57	489.5475217	0.35	calc.	climate	PC2-1	0.294149176	6.85735266	PC2	S. glauca	SPh-PC	Wet	3rd
42	21-Jul-17	10:06:11	7.1	2.2	422	17	546	10.4	11.6	201.4	1012	349	4.32	1.48	34.41	489.5475217	0.35	calc.	climate	PC2-1	0.302319986	7.028939679	PC2	S. glauca	SPh-PC	Wet	3rd
43	21-Jul-17	10:07:33	6.9	2.2	421	19	546	10.5	11.7	198.7	1012	337	4.34	1.41	38.27	751.3613511	0.35	calc.	climate	PC2-2	0.187659373	5.09342142	PC2	S. glauca	SPh-PC	Wet	3rd
44	21-Jul-17	10:07:43	7	2.3	422	20	546	10.5	11.7	198.7	1012	339	4.46	1.53	39.39	751.3613511	0.35	calc.	climate	PC2-2	0.203630383	5.242484185	PC2	S. glauca	SPh-PC	Wet	3rd
45	21-Jul-17	10:07:48	6.9	2.3	422	20	546	10.5	11.7	200.7	1013	339	4.46	1.53	39.39	751.3613511	0.35	calc.	climate	PC2-2	0.203630383	5.242484185	PC2	S. glauca	SPh-PC	Wet	3rd
46	21-Jul-17	10:07:55	7	2.4	422	23	546	10.4	11.6	199.7	1012	332	4.73	1.72	45.77	751.3613511	0.35	calc.	climate	PC2-2	0.228917817	6.091609574	PC2	S. glauca	SPh-PC	Wet	3rd
47	21-Jul-17	10:08:05	6.9	2.5	421	22	546	10.4	11.6	201	1013	339	4.92	1.91	43.96	751.3613511	0.35	calc.	climate	PC2-2	0.25420525	5.8507135	PC2	S. glauca	SPh-PC	Wet	3rd
48	21-Jul-17	10:08:14	7	2.6	421	24	546	10.4	11.6	199.7	1013	336	5.14	2.1	47.39	751.3613511	0.35	calc.	climate	PC2-2	0.279492683	6.307218215	PC2	S. glauca	SPh-PC	Wet	3rd
49	21-Jul-17	10:12:40	6.6	2	419	26	546	10.1	11.2	199.4	1013	297	4.02	1.24	52.69	919.3858465	0.35	calc.	climate	PC2-3	0.134872644	5.730999689	PC2	S. glauca	SPh-PC	Wet	3rd
50	21-Jul-17	10:12:50	6.5	2.2	418	26	546	10	11.2	200.7	1012	309	4.32	1.44	50.96	919.3858465	0.35	calc.	climate	PC2-3	0.156626296	5.542830597	PC2	S. glauca	SPh-PC	Wet	3rd
51	21-Jul-17	10:12:59	6.6	2.2	418	29	546	10.1	11.2	199.7	1013	298	4.43	1.54	58.68	919.3858465	0.35	calc.	climate	PC2-3	0.167503122	6.382521574	PC2	S. glauca	SPh-PC	Wet	3rd
52	21-Jul-17	10:13:10	6.5	2.4	419	30	546	10.1	11.2	199	1013	302	4.65	1.7	59.4	919.3858465	0.35	calc.	climate	PC2-3	0.184906044	6.460834722	PC2	S. glauca	SPh-PC	Wet	3rd
53	21-Jul-17	10:13:18	6.6	2.4	419	32	546	10.1	11.3	199.4	1013	294	4.7	1.72	64.33	919.3858465	0.35	calc.	climate	PC2-3	0.187081409	6.99706225	PC2	S. glauca	SPh-PC	Wet	3rd
54	21-Jul-17	10:13:29	6.6	2.5	418	32	546	10.1	11.3	199.4	1013	301	4.91	1.92	63.45	919.3858465	0.35	calc.	climate	PC2-3	0.208835062	6.90134618	PC2	S. glauca	SPh-PC	Wet	3rd
109	25-Jul-17	12:28:48	17.7	1.1	385	15	546	20.8	21.9	200.7	1009	203	2.15	0.31	29.41	489.5475217	0.35	calc.	climate	PC2-1	0.063323781	6.007588374	PC2	S. glauca	SPh-PC	Wet	4th
110	25-Jul-17	12:28:57	17.7	1.2	385	17	546	20.8	21.9	199	1009	207	2.46	0.37	33.28	489.5475217	0.35	calc.	climate	PC2-1	0.075579997	6.798114284	PC2	S. glauca	SPh-PC	Wet	4th
111	25-Jul-17	12:29:07	17.8	1.4	386	17	546	20.8	22	200	1009	219	2.73	0.42	34.25	489.5475217	0.35	calc.	climate	PC2-1	0.08579351	6.996256437	PC2	S. glauca	SPh-PC	Wet	4th
112	25-Jul-17	12:29:16	17.9	1.4	386	18	546	20.9	22	199.4	1009	214	2.69	0.43	35.9	489.5475217	0.35	calc.	climate	PC2-1	0.087836212	7.333302368	PC2	S. glauca	SPh-PC	Wet	4th
113	25-Jul-17	12:29:26	17.7	1.5	385	18	546	20.9	22	201	1009	226	2.86	0.46	35.12	489.5475217	0.35	calc.	climate	PC2-1	0.09396432	7.173971564	PC2	S. glauca	SPh-PC	Wet	4th
114	25-Jul-17	12:29:34	17.7	1.8	385	18	546	20.9	22.1	198.4	1009	246	3.49	0.59	36.7	489.5475217	0.35	calc.	climate	PC2-1	0.120519454	7.496718576	PC2	S. glauca	SPh-PC	Wet	4th
115	25-Jul-17	12:31:42	17.6	1.4	385	23	546	20.5	21.6	200.4	1009	176	2.72	0.45	45.36	751.3613511	0.35	calc.	climate	PC2-2	0.059891289	6.037041955	PC2	S. glauca	SPh-PC	Wet	4th
116	25-Jul-17	12:31:48	17.7	1.5	385	26	546	20.5	21.7	199	1009	163	2.91	0.49	51.8	751.3613511	0.35	calc.	climate	PC2-2	0.065214959	6.89415285	PC2	S. glauca	SPh-PC	Wet	4th
117	25-Jul-17	12:31:57	17.6	1.7	383	25	546	20.5	21.6	198.4	1009	205	3.27	0.62	49.09	751.3613511	0.35	calc.	climate	PC2-2	0.082516887	6.533474197	PC2	S. glauca	SPh-PC	Wet	4th
118	25-Jul-17	12:32:07	17.6	1.7	383	27	546	20.4	21.6	199.4	1009	198	3.45	0.65	52.98	751.3613511	0.35	calc.	climate	PC2-2	0.08650964	7.051201119	PC2	S. glauca	SPh-PC	Wet	4th
119	25-Jul-17	12:32:15	17.6	1.9	384	27	546	20.4	21.6	198	1008	215	3.79	0.76	53.76	751.3613511	0.35	calc.	climate	PC2-2	0.101149733	7.155012687	PC2	S. glauca	SPh-PC	Wet	4th
120	25-Jul-17	12:32:22	17.6	1.9	384	27	546	20.4	21.6	199.7	1009	215	3.79	0.76	53.76	751.3613511	0.35	calc.	climate	PC2-2	0.101149733	7.155012687	PC2	S. glauca	SPh-PC	Wet	4th
121	25-Jul-17	12:34:20	17.8	1.5	384	28	546	20.3	21.4	199	1009	175	3.03	0.6	56.42	919.3858465	0.35	calc.	climate	PC2-3	0.065260957	6.136705303	PC2	S. glauca	SPh-PC	Wet	4th
122	25-Jul-17	12:34:40	18	1.7	384	30	546	20.3	21.5	199	1009	190	3.42	0.73	60.44	919.3858465	0.35	calc.	climate	PC2-3	0.079400831	6.573953714	PC2	S. glauca	SPh-PC	Wet	4th
123	25-Jul-17	12:34:48	18	2.1	384	30	546	20.3	21.5	198.7	1009	225	4.11	0.97	59.23	919.3858465	0.35	calc.	climate	PC2-3	0.105505213	6.442344118	PC2	S. glauca	SPh-PC	Wet	4th
124	25-Jul-17	12:34:55	17.9	2.1	384	31	546	20.3	21.5	198.7	1009	226	4.21	1.03	61.2	919.3858465	0.35	calc.	climate	PC2-3	0.112031309	6.656617592	PC2	S. glauca	SPh-PC	Wet	4th
125	25-Jul-17	12:35:02	18	2.1	384	31	546	20.3	21.5	199	1008	226	4.21	1.03	61.2	919.3858465	0.35	calc.	climate	PC2-3	0.112031309	6.656617592	PC2	S. glauca	SPh-PC	Wet	4th
126	25-Jul-17	12:35:08	17.9	2.2	383	30	546	20.3	21.4	201	1009	233	4.32	1.1	60.68	919.3858465	0.35	calc.	climate	PC2-3	0.119645087	6.600058097	PC2	S. glauca	SPh-PC	Wet	4th
93	27-Jul-17	11:01:55	13.9	4.4	376	16	546	22.7	23.8	201	999	289	8.67	1.03	32.26	489.5475217	0.35	calc.	climate	PC2-1	0.210398369	6.589758618	PC2	S. glauca	SPh-PC	Wet	5th
94	27-Jul-17	11:02:03	14	4.5	376	21	546	22.8	23.9	199.4	998	268	8.9	1.07	41.43	489.5475217	0.35	calc.	climate	PC2-1	0.218569179	8.462916911	PC2	S. glauca	SPh-PC	Wet	5th
95	27-Jul-17	11:02:13	14.1	4.7	376	20	546	22.8	24	199.4	999	275	9.31	1.15	40.37	489.5475217	0.35	calc.	climate	PC2-1	0.2349108	8.246390434	PC2	S. glauca	SPh-PC	Wet	5th
96	27-Jul-17	11:02:22	14.2	4.9	376	23	546	22.9	24.1	199.4	998	268	9.8	1.27	45.92	489.5475217	0.35	calc.	climate	PC2-1	0.259423231	9.380090382	PC2	S. glauca	SPh-PC	Wet	5th
97	27-Jul-17	11:02:32	14.2	5.1	376	23	546	23	24.1	198.4	998	271	10.1	1.35	46.21	489.5475217	0.35	calc.	climate	PC2-1	0.275764852	9.439328758	PC2	S. glauca	SPh-PC	Wet	5th
98	27-Jul-17	11:02:41	14.2	5.1	376	25	546	23	24.2	198.7	998	263	10.17	1.35	49.6	489.5475217	0.35	calc.	climate	PC2-1	0.275764852	10.13180494	PC2	S. glauca	SPh-PC	Wet	5th
99	27-Jul-17	11:04:48	14.6	5.1	376	28	546	23.2	24.3	200.7	998	249	10.04	1.37	56.41	751.3613511	0.35	calc.	climate	PC2-2	0.182335703	7.507705835	PC2	S. glauca	SPh-PC	Wet	5th
100	27-Jul-17	11:04:54	14.4	5.4	376	32	546	23.2	24.3	199	998	242	10.73	1.55	64.16	751.3613511	0.35	calc.	climate	PC2-2	0.206292218	8.539166928	PC2	S. glauca	SPh-PC	Wet	5th
101	27-Jul-17	11:05:06	14.6	5.7	376	32	546	23.3	24.4	200.7	999	248	11.25	1.68	63.87	751.3613511	0.35	calc.	climate	PC2-2	0.223594146	8.500570319	PC2	S. glauca	SPh-PC	Wet	5th
102	27-Jul-17	11:05:14	14.6	5.9	376	37	546	23.2	24.4	199.4	998	239	11.78	1.92	72.65	751.3613511	0.35	calc.	climate	PC2-2	0.255536167	9.669115918	PC2	S. glauca	SPh-PC	Wet	5th
103	27-Jul-17	11:05:25	14.5	6.1	376	36	546	23.3	24.4	200	999	244	12.11	2.07	72.31	751.3613511	0.35	calc.	climate	PC2-2	0.27549993	9.623864722	PC2	S. glauca	SPh-PC	Wet	5th
104	27-Jul-17	11:05:34	14.7	6.2	376	38	546	23.3	24.5	199	998	238	12.38	2.13	76.73	751.3613511	0.35	calc.	climate	PC2-2	0.283485436	10.21213027	PC2	S. glauca	SPh-PC	Wet	5th
105	27-Jul-17	11:05:44	14.5	6.1	375	38	546	23.3	24.4	200.7	998	240	12.2	2.16	76.43	751.3613511	0.35	calc.	climate	PC2-2	0.287478188	10.17220275	PC2	S. glauca	SPh-PC	Wet	5th
106	27-Jul-17	11:05:52	14.5	6.4	375	40	546	23.3	24.5	199	999	238	12.74	2.29	79.47	751.3613511	0.35	calc.	climate	PC2-2	0.304780116	10.57680168	PC2	S. glauca	SPh-PC	Wet	5th
1	15-Jul-17	17:22:01	8	1.5	425	11	546	8.5	9.7	199	1019	381	2.86	1.76	22.42	983.7734257	0.35	calc.	climate	PC3-1	0.178902983	2.278980039	PC3	S. richardsonii	SPh-PC	Wet	1st
2	15-Jul-17	17:22:06	8	1.5	425	16	546	8.5	9.7	199.7	1019	365	2.96	1.96	32.14	983.7734257	0.35	calc.	climate	PC3-1	0.199232867	3.26701242	PC3	S. richardsonii	SPh-PC	Wet	1st
3	15-Jul-17	17:22:16	8	1.6	424	16	546	8.5	9.8	199.4	1019	368	3.09	2.14	31.99	983.7734257	0.35	calc.	climate	PC3-1	0.217529763	3.251765006	PC3	S. richardsonii	SPh-PC	Wet	1st
4	15-Jul-17	17:22:25	8	1.6	424	20	546	8.5	9.6	199.7	1019	359	3.15	2.46	39.35	983.7734257	0.35	calc.	climate	PC3-1	0.250057578	3.999904752	PC3	S. richardsonii	SPh-PC	Wet	1st
5	15-Jul-17	17:22:34	8	1.7	424	20	546	8.5	9.7	198.7	1019	359	3.24	2.45	39.2	983.7734257	0.35	calc.	climate	PC3-1	0.249041084	3.984657338	PC3	S. richardsonii	SPh-PC	Wet	1st
6	15-Jul-17	17:22:44	7.9	1.7	424	23	546	8.6	9.7	199.7	1019	353	3.34	2.77	45.17	983.7734257	0.35	calc.	climate	PC3-1	0.281568899	4.591504387	PC3	S. richardsonii	SPh-PC	Wet	1st
7	15-Jul-17	17:24:23	7.9	1.5	425	17	546	8.5	9.6	199	1019	360	2.93	1.87	34.48	1090.88231	0.35	calc.	climate	PC3-2	0.171420875	3.160744261	PC3	S. richardsonii	SPh-PC	Wet	1st
8	15-Jul-17	17:24:31	7.9	1.6	423	16	546	8.5	9.6	201.4	1019	369	3.08	2.21	31.21	1090.88231	0.35	calc.	climate	PC3-2	0.202588307	2.860986903	PC3	S. richardsonii	SPh-PC	Wet	1st
9	15-Jul-17	17:24:42	7.9	1.6	423	20	546	8.4	9.6	199.4	1019	355	3.17	2.4	40.69	1090.88231	0.35	calc.	climate	PC3-2	0.220005401	3.730008237	PC3	S. richardsonii	SPh-PC	Wet	1st
10	15-Jul-17	17:24:50	7.9	1.7	424	22	546	8.5	9.6	200.7	1019	356	3.33	2.76	42.76	1090.88231	0.35	calc.	climate	PC3-2	0.253006211	3.919762895	PC3	S. richardsonii	SPh-PC	Wet	1st
11	15-Jul-17	17:24:59	7.9	1.7	424	24	546	8.5	9.6	199.7	1019	349	3.37	2.95	48.42	1090.88231	0.35	calc.	climate	PC3-2	0.270423305	4.438608966	PC3	S. richardsonii	SPh-PC	Wet	1st
12	15-Jul-17	17:25:08	8	1.8	424	24	546	8.5	9.6	200.7	1018	353	3.5	3.38	47.96	1090.88231	0.35	calc.	climate	PC3-2	0.30984094	4.396441264	PC3	S. richardsonii	SPh-PC	Wet	1st
13	15-Jul-17	17:28:08	7.9	1.8	423	11	546	8.4	9.6	198.4	1019	389	3.5	3.37	22.75	1013.980702	0.35	calc.	climate	PC3-3	0.332353465	2.243632443	PC3	S. richardsonii	SPh-PC	Wet	1st
14	15-Jul-17	17:28:30	8	1.8	423	17	546	8.5	9.6	198.7	1019	374	3.58	3.92	34.21	1013.980702	0.35	calc.	climate	PC3-3	0.386595129	3.373831466	PC3	S. richardsonii	SPh-PC	Wet	1st
15	15-Jul-17	17:28:44	8	1.9	423	21	546	8.4	9.6	199	1019	368	3.8	5.01	41.2	1013.980702	0.35	calc.	climate	PC3-3	0.494092243	4.063193698	PC3	S. richardsonii	SPh-PC	Wet	1st
16	15-Jul-17	17:28:52	8	1.9	423	21	546	8.4	9.6	199	1019	368	3.8	5.01	41.2	1013.980702	0.35	calc.	climate	PC3-3	0.494092243	4.063193698	PC3	S. richardsonii	SPh-PC	Wet	1st
17	15-Jul-17	17:28:57	8	2	423	21	546	8.4	9.6	201	1019	370	3.93	5.87	41.38	1013.980702	0.35	calc.	climate	PC3-3	0.578906481	4.080945515	PC3	S. richardsonii	SPh-PC	Wet	1st
18	15-Jul-17	17:29:06	7.9	2	423	23	546	8.5	9.6	198.7	1019	364	3.85	5.91	46.67	1013.980702	0.35	calc.	climate	PC3-3	0.582851329	4.602651696	PC3	S. richardsonii	SPh-PC	Wet	1st
20	18-Jul-17	13:34:05	8.7	3.3	389	10	546	21.3	22.5	200.4	1004	294	6.41	0.49	20.27	983.7734257	0.35	calc.	climate	PC3-1	0.049808217	2.060433782	PC3	S. richardsonii	SPh-PC	Wet	2nd
21	18-Jul-17	13:34:14	8.7	3.5	389	15	546	21.4	22.5	199.7	1004	268	7.02	0.56	29.17	983.7734257	0.35	calc.	climate	PC3-1	0.056923676	2.965113637	PC3	S. richardsonii	SPh-PC	Wet	2nd
22	18-Jul-17	13:34:27	8.7	3.9	389	15	546	21.3	22.5	199.4	1004	279	7.79	0.65	29.74	983.7734257	0.35	calc.	climate	PC3-1	0.066072124	3.023053807	PC3	S. richardsonii	SPh-PC	Wet	2nd
23	18-Jul-17	13:34:43	8.6	4.5	389	18	546	21.3	22.4	200.4	1004	279	8.9	0.82	34.92	983.7734257	0.35	calc.	climate	PC3-1	0.083352526	3.549597813	PC3	S. richardsonii	SPh-PC	Wet	2nd
24	18-Jul-17	13:35:00	8.6	4.8	389	20	546	21.2	22.4	198.7	1004	276	9.56	0.93	38.99	983.7734257	0.35	calc.	climate	PC3-1	0.094533962	3.96331096	PC3	S. richardsonii	SPh-PC	Wet	2nd
25	18-Jul-17	13:35:09	8.6	4.8	389	22	546	21.1	22.3	198.7	1004	267	9.59	0.94	42.98	1265.332891	0.35	calc.	climate	PC3-2	0.074288751	3.396734592	PC3	S. richardsonii	SPh-PC	Wet	2nd
26	18-Jul-17	13:36:37	8.6	4.5	389	19	546	20.7	21.9	201.4	1004	278	8.83	0.87	37.21	1265.332891	0.35	calc.	climate	PC3-2	0.06875661	2.94072811	PC3	S. richardsonii	SPh-PC	Wet	2nd
27	18-Jul-17	13:36:50	8.7	4.9	389	30	546	20.7	21.9	198.7	1004	235	9.76	1.04	59.22	1265.332891	0.35	calc.	climate	PC3-2	0.08219181	4.68019131	PC3	S. richardsonii	SPh-PC	Wet	2nd
28	18-Jul-17	13:37:02	8.6	5.9	389	37	546	20.5	21.7	199.4	1004	237	11.63	1.56	73.46	1265.332891	0.35	calc.	climate	PC3-2	0.123287714	5.805586857	PC3	S. richardsonii	SPh-PC	Wet	2nd
29	18-Jul-17	13:37:11	8.6	5.9	389	37	546	20.6	21.7	199.4	1004	237	11.63	1.56	73.46	1265.332891	0.35	calc.	climate	PC3-2	0.123287714	5.805586857	PC3	S. richardsonii	SPh-PC	Wet	2nd
30	18-Jul-17	13:37:24	9.1	6.2	389	41	546	20.5	21.7	199.4	1004	231	12.33	1.82	82.39	1265.332891	0.35	calc.	climate	PC3-2	0.143835667	6.511329991	PC3	S. richardsonii	SPh-PC	Wet	2nd
31	18-Jul-17	13:37:30	8.7	6.2	389	41	546	20.5	21.7	199.4	1004	231	12.33	1.82	82.39	1061.556986	0.35	calc.	climate	PC3-3	0.171446284	7.761241373	PC3	S. richardsonii	SPh-PC	Wet	2nd
32	18-Jul-17	13:37:36	8.2	6.6	390	42	546	20.5	21.6	198.7	1004	243	13.11	2.16	82.65	1061.556986	0.35	calc.	climate	PC3-3	0.20347471	7.7857337	PC3	S. richardsonii	SPh-PC	Wet	2nd
33	18-Jul-17	13:38:59	8.2	4.5	391	20	546	20.1	21.3	199	1004	276	8.9	0.94	40.31	1061.556986	0.35	calc.	climate	PC3-3	0.088549179	3.797252576	PC3	S. richardsonii	SPh-PC	Wet	2nd
34	18-Jul-17	13:39:12	8.2	4.7	390	20	546	20.1	21.2	200.7	1004	284	9.38	1.05	39.98	1061.556986	0.35	calc.	climate	PC3-3	0.098911317	3.766166162	PC3	S. richardsonii	SPh-PC	Wet	2nd
35	18-Jul-17	13:39:19	8.6	4.9	390	23	546	20.1	21.2	199	1004	275	9.74	1.13	45.72	1061.556986	0.35	calc.	climate	PC3-3	0.106447418	4.306881364	PC3	S. richardsonii	SPh-PC	Wet	2nd
36	18-Jul-17	13:39:32	9	4.9	390	22	546	20.1	21.2	199	1004	278	9.67	1.15	44.83	1061.556986	0.35	calc.	climate	PC3-3	0.108331443	4.223042247	PC3	S. richardsonii	SPh-PC	Wet	2nd
37	18-Jul-17	13:39:37	8.6	4.6	390	25	546	20	21.2	199	1004	264	9.09	1.09	49.09	1061.556986	0.35	calc.	climate	PC3-3	0.102679368	4.624339592	PC3	S. richardsonii	SPh-PC	Wet	2nd
38	18-Jul-17	13:39:46	8.6	5.1	390	25	546	20	21.2	200.7	1004	272	10.07	1.26	50.02	1061.556986	0.35	calc.	climate	PC3-3	0.118693581	4.711946759	PC3	S. richardsonii	SPh-PC	Wet	2nd
39	21-Jul-17	10:17:59	6.5	2.2	417	19	546	10.4	11.4	198.7	1012	331	4.32	1.31	38.16	983.7734257	0.35	calc.	climate	PC3-1	0.133160743	3.87894194	PC3	S. richardsonii	SPh-PC	Wet	3rd
40	21-Jul-17	10:18:11	6.5	2.3	417	23	546	10.4	11.5	199.7	1013	317	4.59	1.44	46.56	983.7734257	0.35	calc.	climate	PC3-1	0.146375168	4.732797084	PC3	S. richardsonii	SPh-PC	Wet	3rd
41	21-Jul-17	10:18:18	6.5	2.4	417	23	546	10.4	11.5	198.7	1013	320	4.71	1.53	46.77	983.7734257	0.35	calc.	climate	PC3-1	0.155523616	4.754143462	PC3	S. richardsonii	SPh-PC	Wet	3rd
42	21-Jul-17	10:18:24	6.5	2.5	417	26	546	10.3	11.5	198.7	1013	312	4.86	1.64	52.66	983.7734257	0.35	calc.	climate	PC3-1	0.166705052	5.352858557	PC3	S. richardsonii	SPh-PC	Wet	3rd
43	21-Jul-17	10:18:33	6.4	2.6	418	27	546	10.4	11.5	200.7	1013	314	5.05	1.78	53.88	983.7734257	0.35	calc.	climate	PC3-1	0.180935971	5.476870852	PC3	S. richardsonii	SPh-PC	Wet	3rd
44	21-Jul-17	10:18:41	6.4	2.6	418	29	546	10.4	11.5	198.7	1012	310	5.13	1.86	57.45	983.7734257	0.35	calc.	climate	PC3-1	0.189067925	5.839759288	PC3	S. richardsonii	SPh-PC	Wet	3rd
45	21-Jul-17	10:20:05	6.4	2.7	418	28	546	10.2	11.4	199.7	1012	321	5.3	2.16	55.13	1265.332891	0.35	calc.	climate	PC3-2	0.170706066	4.356956213	PC3	S. richardsonii	SPh-PC	Wet	3rd
46	21-Jul-17	10:20:10	6.5	3	418	27	546	10.2	11.4	200.4	1012	332	5.88	2.92	54.91	1265.332891	0.35	calc.	climate	PC3-2	0.230769311	4.339569484	PC3	S. richardsonii	SPh-PC	Wet	3rd
47	21-Jul-17	10:20:17	6.5	3.1	418	35	546	10.2	11.4	199	1013	316	6.17	3.64	70.38	1265.332891	0.35	calc.	climate	PC3-2	0.287671333	5.562172651	PC3	S. richardsonii	SPh-PC	Wet	3rd
48	21-Jul-17	10:20:27	6.4	3.3	417	34	546	10.2	11.3	201	1012	325	6.48	4.74	68.53	1265.332891	0.35	calc.	climate	PC3-2	0.374604978	5.415966067	PC3	S. richardsonii	SPh-PC	Wet	3rd
49	21-Jul-17	10:20:50	6.4	3.5	417	40	546	10.2	11.3	199	1012	317	6.85	6.54	80.48	1265.332891	0.35	calc.	climate	PC3-2	0.516860033	6.360381571	PC3	S. richardsonii	SPh-PC	Wet	3rd
50	21-Jul-17	10:20:56	6.5	3.6	417	44	546	10.2	11.3	199	1013	312	7	7.72	87.54	1265.332891	0.35	calc.	climate	PC3-2	0.610116125	6.918337509	PC3	S. richardsonii	SPh-PC	Wet	3rd
51	21-Jul-17	10:22:33	6.5	2.5	418	18	546	10.1	11.3	199.4	1013	350	5	1.92	36.32	1061.556986	0.35	calc.	climate	PC3-3	0.180866409	3.42138957	PC3	S. richardsonii	SPh-PC	Wet	3rd
52	21-Jul-17	10:22:41	6.5	2.7	417	18	546	10.2	11.3	201	1013	356	5.23	2.21	34.91	1061.556986	0.35	calc.	climate	PC3-3	0.208184773	3.288565801	PC3	S. richardsonii	SPh-PC	Wet	3rd
53	21-Jul-17	10:22:50	6.5	2.7	417	19	546	10.2	11.3	199	1012	351	5.31	2.26	37.88	1061.556986	0.35	calc.	climate	PC3-3	0.212894836	3.568343527	PC3	S. richardsonii	SPh-PC	Wet	3rd
54	21-Jul-17	10:23:01	6.5	2.8	417	19	546	10.2	11.3	200.7	1013	352	5.42	2.37	38.05	1061.556986	0.35	calc.	climate	PC3-3	0.223256974	3.584357741	PC3	S. richardsonii	SPh-PC	Wet	3rd
55	21-Jul-17	10:23:19	6.5	2.9	418	21	546	10.2	11.4	201	1013	349	5.63	2.62	42.08	1061.556986	0.35	calc.	climate	PC3-3	0.246807287	3.963988797	PC3	S. richardsonii	SPh-PC	Wet	3rd
56	21-Jul-17	10:23:28	6.6	3	418	22	546	10.3	11.4	200	1013	349	5.79	2.88	43.18	1061.556986	0.35	calc.	climate	PC3-3	0.271299613	4.067610177	PC3	S. richardsonii	SPh-PC	Wet	3rd
91	25-Jul-17	12:13:14	17.1	2.3	390	20	546	19.7	20.8	200.7	1008	295	4.47	1.22	40.26	983.7734257	0.35	calc.	climate	PC3-1	0.124012295	4.092405726	PC3	S. richardsonii	SPh-PC	Wet	4th
92	25-Jul-17	12:13:23	17	2.4	390	22	546	19.6	20.8	199.4	1008	296	4.84	1.46	44.11	983.7734257	0.35	calc.	climate	PC3-1	0.148408156	4.483756	PC3	S. richardsonii	SPh-PC	Wet	4th
93	25-Jul-17	12:13:37	17.1	2.5	391	22	546	19.6	20.8	198.4	1009	296	4.99	1.49	44.61	983.7734257	0.35	calc.	climate	PC3-1	0.151457639	4.534580711	PC3	S. richardsonii	SPh-PC	Wet	4th
94	25-Jul-17	12:13:45	17	2.6	391	22	546	19.6	20.7	199	1008	302	5.17	1.69	44.46	983.7734257	0.35	calc.	climate	PC3-1	0.171787523	4.519333298	PC3	S. richardsonii	SPh-PC	Wet	4th
95	25-Jul-17	12:13:53	16.9	2.6	391	23	546	19.6	20.7	200.4	1009	301	5.15	1.68	45.38	983.7734257	0.35	calc.	climate	PC3-1	0.170771029	4.612850766	PC3	S. richardsonii	SPh-PC	Wet	4th
96	25-Jul-17	12:14:01	16.7	2.6	391	24	546	19.5	20.7	199.4	1008	294	5.13	1.65	48.39	983.7734257	0.35	calc.	climate	PC3-1	0.167721546	4.918815526	PC3	S. richardsonii	SPh-PC	Wet	4th
97	25-Jul-17	12:16:28	16.3	2.5	389	34	546	19.3	20.4	200.7	1009	245	5.01	1.4	67.06	1265.332891	0.35	calc.	climate	PC3-2	0.110642821	5.299791105	PC3	S. richardsonii	SPh-PC	Wet	4th
98	25-Jul-17	12:16:36	16.2	2.9	389	37	546	19.3	20.5	199	1009	247	5.63	1.77	73.9	1265.332891	0.35	calc.	climate	PC3-2	0.139884137	5.840360314	PC3	S. richardsonii	SPh-PC	Wet	4th
99	25-Jul-17	12:16:45	16.2	2.7	390	37	546	19.3	20.5	200.4	1009	242	5.37	1.65	74.63	1265.332891	0.35	calc.	climate	PC3-2	0.130400467	5.898052642	PC3	S. richardsonii	SPh-PC	Wet	4th
100	25-Jul-17	12:16:53	16	3.1	390	39	546	19.3	20.4	199.4	1009	256	6.09	2.28	77.96	1265.332891	0.35	calc.	climate	PC3-2	0.180189736	6.161224494	PC3	S. richardsonii	SPh-PC	Wet	4th
101	25-Jul-17	12:17:02	16.2	3.2	390	39	546	19.3	20.4	199.4	1008	256	6.24	2.28	78.18	1265.332891	0.35	calc.	climate	PC3-2	0.180189736	6.178611223	PC3	S. richardsonii	SPh-PC	Wet	4th
102	25-Jul-17	12:17:12	16.2	3.4	390	41	546	19.3	20.4	200	1008	260	6.65	2.77	81.63	1265.332891	0.35	calc.	climate	PC3-2	0.218914724	6.451266745	PC3	S. richardsonii	SPh-PC	Wet	4th
103	25-Jul-17	12:22:13	16.3	2.6	388	29	546	20.4	21.5	199.7	1008	239	5.12	1.04	57.99	1550.175217	0.35	calc.	climate	PC3-3	0.06708919	3.740867444	PC3	S. richardsonii	SPh-PC	Wet	4th
104	25-Jul-17	12:22:18	16.4	3.1	388	35	546	20.4	21.5	199.7	1009	238	6.1	1.43	69.92	1550.175217	0.35	calc.	climate	PC3-3	0.092247637	4.510457867	PC3	S. richardsonii	SPh-PC	Wet	4th
105	25-Jul-17	12:22:27	16.3	3.5	388	35	546	20.4	21.5	200.4	1009	259	6.9	1.9	69.54	1550.175217	0.35	calc.	climate	PC3-3	0.12256679	4.485944509	PC3	S. richardsonii	SPh-PC	Wet	4th
106	25-Jul-17	12:22:34	16.4	3.7	388	39	546	20.4	21.5	200	1008	252	7.31	2.22	78.71	1550.175217	0.35	calc.	climate	PC3-3	0.143209618	5.077490542	PC3	S. richardsonii	SPh-PC	Wet	4th
107	25-Jul-17	12:22:54	16.2	4	388	43	546	20.3	21.5	199.4	1009	256	7.91	2.94	85	1550.175217	0.35	calc.	climate	PC3-3	0.18965598	5.483251125	PC3	S. richardsonii	SPh-PC	Wet	4th
108	25-Jul-17	12:23:02	16.3	4.1	388	42	546	20.2	21.3	198.7	1009	264	7.98	3.45	84.44	1550.175217	0.35	calc.	climate	PC3-3	0.222555487	5.447126177	PC3	S. richardsonii	SPh-PC	Wet	4th
127	27-Jul-17	10:41:56	12.8	7.7	378	24	546	23.5	24.7	200.7	999	297	15.31	2.83	48.64	983.7734257	0.35	calc.	climate	PC3-1	0.287667864	4.944227881	PC3	S. richardsonii	SPh-PC	Wet	5th
128	27-Jul-17	10:42:03	12.8	8	378	25	546	23.5	24.7	199.7	998	299	16.05	3.17	49.45	983.7734257	0.35	calc.	climate	PC3-1	0.322228667	5.026563913	PC3	S. richardsonii	SPh-PC	Wet	5th
129	27-Jul-17	10:42:22	12.6	8.1	378	24	546	23.4	24.6	199.7	998	304	16.24	3.47	47.63	983.7734257	0.35	calc.	climate	PC3-1	0.352723494	4.841561965	PC3	S. richardsonii	SPh-PC	Wet	5th
130	27-Jul-17	10:42:33	12.6	8.1	378	24	546	23.3	24.5	198.7	998	304	16.14	3.57	48.23	983.7734257	0.35	calc.	climate	PC3-1	0.362888436	4.902551618	PC3	S. richardsonii	SPh-PC	Wet	5th
131	27-Jul-17	10:42:41	12.5	8	378	23	546	23.3	24.5	199.4	998	309	16.01	3.49	44.9	983.7734257	0.35	calc.	climate	PC3-1	0.354756482	4.564059043	PC3	S. richardsonii	SPh-PC	Wet	5th
132	27-Jul-17	10:42:52	12.6	8.1	378	22	546	23.3	24.4	199.4	998	311	16.08	3.65	43.52	983.7734257	0.35	calc.	climate	PC3-1	0.37102039	4.423782841	PC3	S. richardsonii	SPh-PC	Wet	5th
133	27-Jul-17	10:46:42	12.5	8	376	46	546	22.7	23.9	201	998	249	15.86	4.34	91.73	1355.197458	0.35	calc.	climate	PC3-2	0.320248535	6.768755319	PC3	S. richardsonii	SPh-PC	Wet	5th
134	27-Jul-17	10:46:49	12.7	8.3	376	55	546	22.7	23.9	200	998	231	16.56	5.12	109.82	1355.197458	0.35	calc.	climate	PC3-2	0.377804723	8.103616147	PC3	S. richardsonii	SPh-PC	Wet	5th
135	27-Jul-17	10:46:59	12.6	8.5	376	55	546	22.7	23.9	198.7	998	239	16.98	6.54	109.2	1355.197458	0.35	calc.	climate	PC3-2	0.482586502	8.057866356	PC3	S. richardsonii	SPh-PC	Wet	5th
136	27-Jul-17	10:47:08	12.7	8.8	376	61	546	22.7	23.9	199.7	998	228	17.54	7.77	122	1355.197458	0.35	calc.	climate	PC3-2	0.573348183	9.002378163	PC3	S. richardsonii	SPh-PC	Wet	5th
139	27-Jul-17	10:48:45	12.4	8.2	377	51	546	22.3	23.4	199.4	998	250	16.5	6.83	102.14	1355.197458	0.35	calc.	climate	PC3-2	0.503985597	7.536909062	PC3	S. richardsonii	SPh-PC	Wet	5th
140	27-Jul-17	10:48:56	12.4	8.5	377	51	546	22.2	23.4	200.4	998	254	16.95	8.14	101.28	1355.197458	0.35	calc.	climate	PC3-2	0.600650477	7.473449675	PC3	S. richardsonii	SPh-PC	Wet	5th
141	27-Jul-17	10:56:58	12	9.8	378	39	546	22.2	23.3	199.4	998	297	19.61	under	78.29	1550.175217	0.35	calc.	climate	PC3-3		5.05039683	PC3	S. richardsonii	SPh-PC	Wet	5th
142	27-Jul-17	10:57:09	12.1	9.7	377	39	546	22.1	23.3	199.4	998	298	19.33	under	77.1	1550.175217	0.35	calc.	climate	PC3-3		4.973631315	PC3	S. richardsonii	SPh-PC	Wet	5th
143	27-Jul-17	10:57:23	12	9.8	377	40	546	22.1	23.3	199.4	998	297	19.57	under	79.09	1550.175217	0.35	calc.	climate	PC3-3		5.1020039	PC3	S. richardsonii	SPh-PC	Wet	5th
144	27-Jul-17	10:57:36	12	9.9	377	40	546	22.1	23.3	199.4	998	297	19.67	under	79.21	1550.175217	0.35	calc.	climate	PC3-3		5.10974496	PC3	S. richardsonii	SPh-PC	Wet	5th
145	27-Jul-17	10:57:47	12.2	9.9	377	40	546	22.1	23.2	200.4	999	299	19.75	under	79.37	1550.175217	0.35	calc.	climate	PC3-3		5.120066374	PC3	S. richardsonii	SPh-PC	Wet	5th
146	27-Jul-17	10:57:55	11.9	9.9	377	40	546	22	23.2	200	999	299	19.72	under	79.16	1550.175217	0.35	calc.	climate	PC3-3		5.106519518	PC3	S. richardsonii	SPh-PC	Wet	5th
1	15-Jul-17	17:33:41	7.9	1.3	424	11	546	8.5	9.6	200.7	1019	376	2.61	1.47	22.38	943.1332955	0.35	calc.	climate	PC4-1	0.15586344	2.372941355	PC4	S. richardsonii	SPh-PC	Wet	1st
2	15-Jul-17	17:33:50	8	1.5	424	20	546	8.5	9.6	198.7	1019	348	2.87	1.85	39.97	943.1332955	0.35	calc.	climate	PC4-1	0.19615467	4.23800116	PC4	S. richardsonii	SPh-PC	Wet	1st
3	15-Jul-17	17:34:01	8	1.5	424	20	546	8.5	9.7	199	1019	350	2.95	1.96	40.18	943.1332955	0.35	calc.	climate	PC4-1	0.20781792	4.260267365	PC4	S. richardsonii	SPh-PC	Wet	1st
4	15-Jul-17	17:34:06	8	1.5	424	20	546	8.5	9.7	198.7	1019	350	2.95	1.96	40.18	943.1332955	0.35	calc.	climate	PC4-1	0.20781792	4.260267365	PC4	S. richardsonii	SPh-PC	Wet	1st
5	15-Jul-17	17:34:11	8	1.6	424	26	546	8.5	9.7	198.4	1019	337	3.13	2.36	51.66	943.1332955	0.35	calc.	climate	PC4-1	0.250229741	5.477486613	PC4	S. richardsonii	SPh-PC	Wet	1st
6	15-Jul-17	17:34:21	8	1.7	424	26	546	8.5	9.6	200.7	1019	344	3.32	2.94	51.63	943.1332955	0.35	calc.	climate	PC4-1	0.31172688	5.474305726	PC4	S. richardsonii	SPh-PC	Wet	1st
7	15-Jul-17	17:36:06	7.9	1.3	424	16	546	8.3	9.4	198.7	1019	360	2.58	1.57	31.06	1016.066505	0.35	calc.	climate	PC4-2	0.154517445	3.056886517	PC4	S. richardsonii	SPh-PC	Wet	1st
8	15-Jul-17	17:36:14	8	1.5	424	16	546	8.2	9.4	200.4	1019	367	2.84	1.99	30.89	1016.066505	0.35	calc.	climate	PC4-2	0.195853322	3.040155328	PC4	S. richardsonii	SPh-PC	Wet	1st
9	15-Jul-17	17:36:23	7.9	1.5	424	22	546	8.3	9.4	198.7	1019	347	2.92	2.2	44.18	1016.066505	0.35	calc.	climate	PC4-2	0.21652126	4.348140576	PC4	S. richardsonii	SPh-PC	Wet	1st
10	15-Jul-17	17:36:33	8	1.6	424	22	546	8.3	9.4	199.4	1019	351	3.1	2.62	44.68	1016.066505	0.35	calc.	climate	PC4-2	0.257857137	4.397349954	PC4	S. richardsonii	SPh-PC	Wet	1st
11	15-Jul-17	17:36:42	8	1.6	424	27	546	8.3	9.5	199.4	1019	336	3.14	2.69	54.69	1016.066505	0.35	calc.	climate	PC4-2	0.26474645	5.382521687	PC4	S. richardsonii	SPh-PC	Wet	1st
12	15-Jul-17	17:36:52	8	1.7	423	27	546	8.3	9.5	201	1019	343	3.32	3.3	54.2	1016.066505	0.35	calc.	climate	PC4-2	0.32478189	5.334296497	PC4	S. richardsonii	SPh-PC	Wet	1st
13	15-Jul-17	17:39:18	8	1.5	424	13	546	8.3	9.4	199	1019	377	2.97	2.26	26.75	819.9498902	0.35	calc.	climate	PC4-3	0.2756266	3.262394485	PC4	S. richardsonii	SPh-PC	Wet	1st
14	15-Jul-17	17:39:33	8	1.6	424	18	546	8.3	9.4	199.4	1019	367	3.15	2.79	35.51	819.9498902	0.35	calc.	climate	PC4-3	0.340264696	4.330752455	PC4	S. richardsonii	SPh-PC	Wet	1st
15	15-Jul-17	17:39:43	7.9	1.7	424	18	546	8.3	9.4	200.4	1019	369	3.27	3.14	36.21	819.9498902	0.35	calc.	climate	PC4-3	0.382950231	4.416123526	PC4	S. richardsonii	SPh-PC	Wet	1st
16	15-Jul-17	17:39:52	8	1.7	424	22	546	8.3	9.4	199.4	1019	358	3.27	3.14	43.4	819.9498902	0.35	calc.	climate	PC4-3	0.382950231	5.29300638	PC4	S. richardsonii	SPh-PC	Wet	1st
17	15-Jul-17	17:40:02	8	1.7	424	22	546	8.3	9.4	199	1019	359	3.26	3.2	42.96	819.9498902	0.35	calc.	climate	PC4-3	0.390267752	5.239344564	PC4	S. richardsonii	SPh-PC	Wet	1st
18	15-Jul-17	17:40:21	8	1.8	424	24	546	8.3	9.5	199	1019	355	3.44	3.72	47.97	819.9498902	0.35	calc.	climate	PC4-3	0.453686261	5.850357512	PC4	S. richardsonii	SPh-PC	Wet	1st
19	18-Jul-17	13:12:57	11.5	4.8	392	33	546	22	23.2	199.7	1004	222	9.42	1.07	66.44	943.1332955	0.35	calc.	climate	PC4-1	0.11345162	7.044603379	PC4	S. richardsonii	SPh-PC	Wet	2nd
20	18-Jul-17	13:13:07	11.6	5.2	391	33	546	22	23.1	201	1004	241	10.29	1.29	65.29	943.1332955	0.35	calc.	climate	PC4-1	0.136778121	6.922669395	PC4	S. richardsonii	SPh-PC	Wet	2nd
21	18-Jul-17	13:13:16	11.6	5.4	391	38	546	22	23.1	199.7	1004	229	10.8	1.46	75.43	943.1332955	0.35	calc.	climate	PC4-1	0.154803145	7.997809044	PC4	S. richardsonii	SPh-PC	Wet	2nd
22	18-Jul-17	13:13:34	11.9	6	391	42	546	22	23.2	199.7	1004	232	11.85	1.81	83.05	943.1332955	0.35	calc.	climate	PC4-1	0.191913488	8.805754223	PC4	S. richardsonii	SPh-PC	Wet	2nd
23	18-Jul-17	13:13:58	12.2	6.1	390	43	546	22.1	23.2	199	1004	233	12.13	2	85.86	943.1332955	0.35	calc.	climate	PC4-1	0.212059102	9.103697262	PC4	S. richardsonii	SPh-PC	Wet	2nd
24	18-Jul-17	13:14:13	12.3	6.4	390	44	546	22.1	23.3	199.4	1004	237	12.6	2.28	88.19	943.1332955	0.35	calc.	climate	PC4-1	0.241747377	9.350746116	PC4	S. richardsonii	SPh-PC	Wet	2nd
25	18-Jul-17	13:15:30	12.1	5.4	389	33	546	22.4	23.6	199	1004	239	10.65	1.31	65.78	1016.066505	0.35	calc.	climate	PC4-2	0.128928568	6.473985675	PC4	S. richardsonii	SPh-PC	Wet	2nd
26	18-Jul-17	13:15:39	12	6	389	33	546	22.5	23.6	201	1004	256	11.89	1.66	65.9	1016.066505	0.35	calc.	climate	PC4-2	0.163375133	6.485795925	PC4	S. richardsonii	SPh-PC	Wet	2nd
27	18-Jul-17	13:15:48	12.1	6.2	389	39	546	22.6	23.7	199.4	1004	242	12.39	1.84	77.06	1016.066505	0.35	calc.	climate	PC4-2	0.181090508	7.584149226	PC4	S. richardsonii	SPh-PC	Wet	2nd
28	18-Jul-17	13:15:58	12	6.7	389	38	546	22.6	23.8	198.7	1004	252	13.22	2.13	76.07	1016.066505	0.35	calc.	climate	PC4-2	0.209631947	7.486714659	PC4	S. richardsonii	SPh-PC	Wet	2nd
29	18-Jul-17	13:16:14	11.8	7.1	389	42	546	22.7	23.8	198.7	1004	247	13.97	2.4	83.12	1016.066505	0.35	calc.	climate	PC4-2	0.236205011	8.180566879	PC4	S. richardsonii	SPh-PC	Wet	2nd
30	18-Jul-17	13:16:27	11.6	7.7	389	45	546	22.8	23.9	199.4	1004	250	15.12	2.98	88.43	1016.066505	0.35	calc.	climate	PC4-2	0.293287889	8.703170466	PC4	S. richardsonii	SPh-PC	Wet	2nd
31	18-Jul-17	13:17:43	11.3	4.4	389	20	546	23	24.1	199.7	1004	259	8.69	0.75	39.29	819.9498902	0.35	calc.	climate	PC4-3	0.091469004	4.791756237	PC4	S. richardsonii	SPh-PC	Wet	2nd
32	18-Jul-17	13:17:58	11.1	4.9	389	20	546	23	24.1	199.4	1004	274	9.7	0.9	39.37	819.9498902	0.35	calc.	climate	PC4-3	0.109762805	4.80151293	PC4	S. richardsonii	SPh-PC	Wet	2nd
33	18-Jul-17	13:18:05	11	5.4	389	23	546	23.1	24.2	199	1004	266	10.59	1.04	45.93	819.9498902	0.35	calc.	climate	PC4-3	0.126837019	5.601561821	PC4	S. richardsonii	SPh-PC	Wet	2nd
34	18-Jul-17	13:18:13	11.1	5.6	389	23	546	23.1	24.2	200.7	1004	273	11.15	1.16	46.27	819.9498902	0.35	calc.	climate	PC4-3	0.14147206	5.64302777	PC4	S. richardsonii	SPh-PC	Wet	2nd
35	18-Jul-17	13:18:23	11	5.9	389	25	546	23.2	24.3	198.7	1004	267	11.73	1.23	50.75	819.9498902	0.35	calc.	climate	PC4-3	0.150009167	6.189402622	PC4	S. richardsonii	SPh-PC	Wet	2nd
36	18-Jul-17	13:18:30	10.8	6.1	389	25	546	23.3	24.4	201	1004	271	12.15	1.31	50.84	819.9498902	0.35	calc.	climate	PC4-3	0.159765861	6.200378902	PC4	S. richardsonii	SPh-PC	Wet	2nd
37	18-Jul-17	13:18:40	10.8	6.3	389	28	546	23.3	24.4	199	1004	265	12.57	1.39	55.13	819.9498902	0.35	calc.	climate	PC4-3	0.169522555	6.723581606	PC4	S. richardsonii	SPh-PC	Wet	2nd
38	18-Jul-17	13:18:49	10.5	6.5	389	28	546	23.3	24.4	198.4	1004	268	12.92	1.45	54.84	819.9498902	0.35	calc.	climate	PC4-3	0.176840075	6.688213592	PC4	S. richardsonii	SPh-PC	Wet	2nd
39	21-Jul-17	10:28:32	6.5	2.7	419	31	546	10.2	11.3	200	1013	311	5.24	2.2	61.56	943.1332955	0.35	calc.	climate	PC4-1	0.233265013	6.527179169	PC4	S. richardsonii	SPh-PC	Wet	3rd
40	21-Jul-17	10:28:43	6.5	2.9	419	32	546	10.2	11.3	200.7	1012	318	5.67	2.74	63.46	943.1332955	0.35	calc.	climate	PC4-1	0.29052097	6.728635316	PC4	S. richardsonii	SPh-PC	Wet	3rd
41	21-Jul-17	10:28:53	6.5	3	419	38	546	10.2	11.3	200	1013	304	5.9	3.16	76.42	943.1332955	0.35	calc.	climate	PC4-1	0.335053382	8.102778299	PC4	S. richardsonii	SPh-PC	Wet	3rd
42	21-Jul-17	10:29:10	6.5	3.3	419	42	546	10.2	11.3	199	1012	305	6.44	4.51	83.75	943.1332955	0.35	calc.	climate	PC4-1	0.478193276	8.879974909	PC4	S. richardsonii	SPh-PC	Wet	3rd
43	21-Jul-17	10:29:18	6.4	3.4	420	43	546	10.2	11.4	200	1012	305	6.64	4.84	86.2	943.1332955	0.35	calc.	climate	PC4-1	0.513183028	9.139747309	PC4	S. richardsonii	SPh-PC	Wet	3rd
44	21-Jul-17	10:29:23	6.4	3.4	420	43	546	10.2	11.4	201.4	1012	305	6.64	4.84	86.2	943.1332955	0.35	calc.	climate	PC4-1	0.513183028	9.139747309	PC4	S. richardsonii	SPh-PC	Wet	3rd
45	21-Jul-17	10:30:57	6.3	2.6	420	19	546	10.2	11.3	200.4	1012	347	5.1	1.85	38.08	1016.066505	0.35	calc.	climate	PC4-2	0.182074696	3.747786174	PC4	S. richardsonii	SPh-PC	Wet	3rd
46	21-Jul-17	10:31:06	6.3	2.8	420	30	546	10.2	11.3	199.4	1012	317	5.49	2.29	59.89	1016.066505	0.35	calc.	climate	PC4-2	0.225378948	5.89429921	PC4	S. richardsonii	SPh-PC	Wet	3rd
47	21-Jul-17	10:31:15	6.3	3	420	30	546	10.2	11.4	200.7	1012	324	5.87	2.77	59.94	1016.066505	0.35	calc.	climate	PC4-2	0.27261995	5.899220148	PC4	S. richardsonii	SPh-PC	Wet	3rd
48	21-Jul-17	10:31:24	6.3	3.1	420	37	546	10.2	11.3	199	1013	310	6.18	3.47	74.54	1016.066505	0.35	calc.	climate	PC4-2	0.341513078	7.336133965	PC4	S. richardsonii	SPh-PC	Wet	3rd
49	21-Jul-17	10:31:37	6.3	3.3	420	38	546	10.3	11.4	201	1012	312	6.41	3.74	75.57	1016.066505	0.35	calc.	climate	PC4-2	0.368086142	7.437505282	PC4	S. richardsonii	SPh-PC	Wet	3rd
50	21-Jul-17	10:31:45	6.3	3.4	420	43	546	10.3	11.4	199	1012	305	6.65	4.53	84.51	1016.066505	0.35	calc.	climate	PC4-2	0.445836958	8.317368948	PC4	S. richardsonii	SPh-PC	Wet	3rd
51	21-Jul-17	10:32:50	6.3	2.8	420	20	546	10.3	11.5	200.7	1012	350	5.52	2.16	39.61	819.9498902	0.35	calc.	climate	PC4-3	0.263430732	4.830783012	PC4	S. richardsonii	SPh-PC	Wet	3rd
52	21-Jul-17	10:33:09	6.3	3	421	25	546	10.3	11.6	200.7	1012	339	5.87	2.54	49.22	819.9498902	0.35	calc.	climate	PC4-3	0.309775028	6.002805853	PC4	S. richardsonii	SPh-PC	Wet	3rd
53	21-Jul-17	10:33:18	6.4	3.1	421	28	546	10.5	11.6	199.7	1012	332	6.03	2.75	55.29	819.9498902	0.35	calc.	climate	PC4-3	0.335386349	6.743094994	PC4	S. richardsonii	SPh-PC	Wet	3rd
54	21-Jul-17	10:33:37	6.4	3.1	421	29	546	10.5	11.6	199	1012	330	6.05	2.84	57.62	819.9498902	0.35	calc.	climate	PC4-3	0.346362629	7.027258701	PC4	S. richardsonii	SPh-PC	Wet	3rd
55	21-Jul-17	10:33:47	6.4	3.2	421	29	546	10.5	11.6	200.4	1013	332	6.24	3.1	57.45	819.9498902	0.35	calc.	climate	PC4-3	0.378071884	7.006525726	PC4	S. richardsonii	SPh-PC	Wet	3rd
56	21-Jul-17	10:33:56	6.4	3.2	421	30	546	10.5	11.7	198.7	1013	327	6.2	3.03	60.34	819.9498902	0.35	calc.	climate	PC4-3	0.369534777	7.358986289	PC4	S. richardsonii	SPh-PC	Wet	3rd
91	25-Jul-17	12:41:29	17.7	2.5	386	40	546	20.2	21.4	200.4	1008	213	4.91	1.4	80.03	943.1332955	0.35	calc.	climate	PC4-1	0.148441372	8.485544979	PC4	S. richardsonii	SPh-PC	Wet	4th
92	25-Jul-17	12:41:36	17.7	2.9	386	43	546	20.2	21.4	199.7	1008	226	5.71	1.9	86.55	943.1332955	0.35	calc.	climate	PC4-1	0.201456147	9.176857652	PC4	S. richardsonii	SPh-PC	Wet	4th
93	25-Jul-17	12:41:45	17.7	3	386	43	546	20.1	21.3	199	1008	238	5.89	2.24	86.16	943.1332955	0.35	calc.	climate	PC4-1	0.237506195	9.135506127	PC4	S. richardsonii	SPh-PC	Wet	4th
94	25-Jul-17	12:41:56	17.3	3.2	386	47	546	20.1	21.2	199.4	1008	238	6.31	2.73	93.08	943.1332955	0.35	calc.	climate	PC4-1	0.289460675	9.869230621	PC4	S. richardsonii	SPh-PC	Wet	4th
95	25-Jul-17	12:42:04	17.4	3.4	386	47	546	20	21.2	199.4	1008	248	6.73	3.35	93.56	943.1332955	0.35	calc.	climate	PC4-1	0.355198996	9.920124806	PC4	S. richardsonii	SPh-PC	Wet	4th
96	25-Jul-17	12:42:14	17.4	3.5	386	49	546	20	21.2	200.7	1008	245	7.02	3.74	98.68	943.1332955	0.35	calc.	climate	PC4-1	0.396550521	10.46299611	PC4	S. richardsonii	SPh-PC	Wet	4th
97	25-Jul-17	12:42:18	17.3	3.5	386	49	546	19.9	21.2	199.4	1008	245	7.02	3.74	98.68	943.1332955	0.35	calc.	climate	PC4-1	0.396550521	10.46299611	PC4	S. richardsonii	SPh-PC	Wet	4th
98	25-Jul-17	12:46:00	18.8	2.4	385	33	546	20.8	21.8	199.4	1008	245	4.66	1.41	65.08	1016.066505	0.35	calc.	climate	PC4-2	0.138770444	6.405092547	PC4	S. richardsonii	SPh-PC	Wet	4th
99	25-Jul-17	12:46:05	18.9	2.5	385	35	546	20.8	21.9	199	1009	243	5.03	1.57	70.15	1016.066505	0.35	calc.	climate	PC4-2	0.154517445	6.904075632	PC4	S. richardsonii	SPh-PC	Wet	4th
100	25-Jul-17	12:46:14	19.1	2.8	385	35	546	20.8	22	199.7	1008	258	5.64	2.01	70.57	1016.066505	0.35	calc.	climate	PC4-2	0.197821697	6.945411509	PC4	S. richardsonii	SPh-PC	Wet	4th
101	25-Jul-17	12:46:24	18.9	3.1	385	37	546	20.9	22.1	199.4	1009	264	6.12	2.47	73.15	1016.066505	0.35	calc.	climate	PC4-2	0.243094324	7.199331896	PC4	S. richardsonii	SPh-PC	Wet	4th
102	25-Jul-17	12:46:33	18.9	3.2	385	37	546	20.9	22.1	199	1008	272	6.41	2.91	72.99	1016.066505	0.35	calc.	climate	PC4-2	0.286398576	7.183584895	PC4	S. richardsonii	SPh-PC	Wet	4th
103	25-Jul-17	12:46:42	18.3	3.4	385	38	546	21	22.1	199	1008	273	6.78	3.28	74.84	1016.066505	0.35	calc.	climate	PC4-2	0.322813515	7.365659591	PC4	S. richardsonii	SPh-PC	Wet	4th
104	25-Jul-17	12:48:55	19.7	2	386	21	546	21.7	22.8	199	1009	250	3.9	0.71	40.87	819.9498902	0.35	calc.	climate	PC4-3	0.086590657	4.984450939	PC4	S. richardsonii	SPh-PC	Wet	4th
105	25-Jul-17	12:49:06	19	1.6	385	20	546	21.7	22.9	199	1008	236	3.24	0.58	39.05	819.9498902	0.35	calc.	climate	PC4-3	0.07073603	4.762486155	PC4	S. richardsonii	SPh-PC	Wet	4th
106	25-Jul-17	12:49:14	19.3	2.5	385	22	546	21.8	22.9	199.4	1008	271	5	1.06	44.56	819.9498902	0.35	calc.	climate	PC4-3	0.129276193	5.43447844	PC4	S. richardsonii	SPh-PC	Wet	4th
107	25-Jul-17	12:49:25	19.2	2.5	385	22	546	21.8	22.9	200.7	1009	273	4.97	1.09	44.62	819.9498902	0.35	calc.	climate	PC4-3	0.132934953	5.44179596	PC4	S. richardsonii	SPh-PC	Wet	4th
108	25-Jul-17	12:49:33	19.2	2.7	385	23	546	21.9	23.1	198.7	1008	274	5.34	1.18	46.2	819.9498902	0.35	calc.	climate	PC4-3	0.143911233	5.634490662	PC4	S. richardsonii	SPh-PC	Wet	4th
143	27-Jul-17	10:23:14	13.3	5.7	383	29	546	21.6	22.7	201	998	285	11.31	2.44	57.7	637.7011094	0.35	calc.	climate	PC4-1	0.382624393	9.048126019	PC4	S. richardsonii	SPh-PC	Wet	5th
144	27-Jul-17	10:23:20	13.4	5.9	383	32	546	21.6	22.8	198.4	998	277	11.67	2.59	63.77	637.7011094	0.35	calc.	climate	PC4-1	0.406146385	9.999982603	PC4	S. richardsonii	SPh-PC	Wet	5th
145	27-Jul-17	10:23:30	13.4	5.9	381	30	546	21.6	22.8	201	998	283	11.76	2.67	60.01	637.7011094	0.35	calc.	climate	PC4-1	0.418691447	9.410364686	PC4	S. richardsonii	SPh-PC	Wet	5th
146	27-Jul-17	10:23:39	13.4	6	381	32	546	21.6	22.8	199	998	279	11.93	2.81	63.49	637.7011094	0.35	calc.	climate	PC4-1	0.440645305	9.956074886	PC4	S. richardsonii	SPh-PC	Wet	5th
147	27-Jul-17	10:23:50	13.4	6.1	381	32	546	21.6	22.8	200.4	998	282	12.19	3.01	63.08	637.7011094	0.35	calc.	climate	PC4-1	0.47200796	9.891781443	PC4	S. richardsonii	SPh-PC	Wet	5th
148	27-Jul-17	10:24:01	13.4	6.1	381	33	546	21.6	22.8	199	998	278	12.19	3	65.13	637.7011094	0.35	calc.	climate	PC4-1	0.470439828	10.21324866	PC4	S. richardsonii	SPh-PC	Wet	5th
149	27-Jul-17	10:28:40	13.5	7.5	380	35	546	22.6	23.8	199.4	998	283	14.98	4.64	70.45	1016.066505	0.35	calc.	climate	PC4-2	0.456663021	6.933601259	PC4	S. richardsonii	SPh-PC	Wet	5th
150	27-Jul-17	10:28:45	13.6	7.8	380	40	546	22.6	23.8	198.7	998	274	15.53	5.32	79.62	1016.066505	0.35	calc.	climate	PC4-2	0.523587774	7.836101238	PC4	S. richardsonii	SPh-PC	Wet	5th
151	27-Jul-17	10:28:54	13.5	8	380	40	546	22.6	23.8	200.4	998	280	15.97	6.7	79.19	1016.066505	0.35	calc.	climate	PC4-2	0.659405656	7.793781173	PC4	S. richardsonii	SPh-PC	Wet	5th
152	27-Jul-17	10:29:03	13.5	8.1	380	43	546	22.6	23.8	199.4	998	274	16.28	7.46	85.41	1016.066505	0.35	calc.	climate	PC4-2	0.734203909	8.405945827	PC4	S. richardsonii	SPh-PC	Wet	5th
153	27-Jul-17	10:29:13	13.5	8.3	380	43	546	22.6	23.8	200	998	276	16.65	8.81	86.71	1016.066505	0.35	calc.	climate	PC4-2	0.867069228	8.533890208	PC4	S. richardsonii	SPh-PC	Wet	5th
154	27-Jul-17	10:29:22	13.5	8.4	380	45	546	22.6	23.8	198.7	998	273	16.75	9.3	90.24	1016.066505	0.35	calc.	climate	PC4-2	0.915294417	8.881308411	PC4	S. richardsonii	SPh-PC	Wet	5th
158	27-Jul-17	10:33:13	13.2	6.6	379	27	546	22.8	23.9	199.4	998	287	13.23	2.44	53.62	819.9498902	0.35	calc.	climate	PC4-3	0.297579161	6.539424011	PC4	S. richardsonii	SPh-PC	Wet	5th
159	27-Jul-17	10:33:28	13.1	6.8	380	30	546	22.7	23.9	199	998	282	13.56	2.64	58.74	819.9498902	0.35	calc.	climate	PC4-3	0.321970895	7.163852414	PC4	S. richardsonii	SPh-PC	Wet	5th
160	27-Jul-17	10:33:40	13.1	7	379	29	546	22.7	23.8	200.4	998	286	13.86	2.9	58.21	819.9498902	0.35	calc.	climate	PC4-3	0.35368015	7.099214317	PC4	S. richardsonii	SPh-PC	Wet	5th
161	27-Jul-17	10:33:51	13	6.9	379	30	546	22.7	23.9	198.7	998	280	13.66	2.72	60.35	819.9498902	0.35	calc.	climate	PC4-3	0.331727589	7.360205876	PC4	S. richardsonii	SPh-PC	Wet	5th
162	27-Jul-17	10:33:59	12.9	7	380	31	546	22.7	23.8	200.7	998	283	14	2.99	60.68	819.9498902	0.35	calc.	climate	PC4-3	0.36465643	7.400452238	PC4	S. richardsonii	SPh-PC	Wet	5th
163	27-Jul-17	10:34:09	13	7.1	380	32	546	22.7	23.8	199.7	998	279	14.16	3.01	63.32	819.9498902	0.35	calc.	climate	PC4-3	0.367095604	7.722423133	PC4	S. richardsonii	SPh-PC	Wet	5th
