# Supplementary material for: Effect of floods on the δ13C values in plant leaves: a study of willows in Northeastern Siberia
Source: PeerJ. 2018 Sep 20;6:e5374. doi: 10.7717/peerj.5374 (PMC6151259; doi:10.7717/peerj.5374)
Supplement: Supplemental Information 9 — Raw data for Figure A2. [file peerj-06-5374-s009.csv]

Year	Date	WaterLevel
2014	2014/6/1	493
2014	2014/6/2	556
2014	2014/6/3	643
2014	2014/6/4	740
2014	2014/6/5	771
2014	2014/6/6	826
2014	2014/6/7	839
2014	2014/6/8	801
2014	2014/6/9	788
2014	2014/6/10	772
2014	2014/6/11	758
2014	2014/6/12	746
2014	2014/6/13	739
2014	2014/6/14	736
2014	2014/6/15	736
2014	2014/6/16	738
2014	2014/6/17	743
2014	2014/6/18	745
2014	2014/6/19	745
2014	2014/6/20	745
2014	2014/6/21	744
2014	2014/6/22	744
2014	2014/6/23	741
2014	2014/6/24	732
2014	2014/6/25	721
2014	2014/6/26	713
2014	2014/6/27	709
2014	2014/6/28	702
2014	2014/6/29	698
2014	2014/6/30	696
2014	2014/7/1	692
2014	2014/7/2	690
2014	2014/7/3	687
2014	2014/7/4	685
2014	2014/7/5	686
2014	2014/7/6	689
2014	2014/7/7	693
2014	2014/7/8	696
2014	2014/7/9	694
2014	2014/7/10	689
2014	2014/7/11	685
2014	2014/7/12	678
2014	2014/7/13	675
2014	2014/7/14	678
2014	2014/7/15	677
2014	2014/7/16	678
2014	2014/7/17	680
2014	2014/7/18	685
2014	2014/7/19	699
2014	2014/7/20	707
2014	2014/7/21	715
2014	2014/7/22	721
2014	2014/7/23	721
2014	2014/7/24	717
2014	2014/7/25	713
2014	2014/7/26	710
2014	2014/7/27	706
2014	2014/7/28	702
2014	2014/7/29	699
2014	2014/7/30	703
2014	2014/7/31	705
2013	2013/6/1	711
2013	2013/6/2	687
2013	2013/6/3	679
2013	2013/6/4	678
2013	2013/6/5	665
2013	2013/6/6	658
2013	2013/6/7	645
2013	2013/6/8	631
2013	2013/6/9	604
2013	2013/6/10	589
2013	2013/6/11	604
2013	2013/6/12	623
2013	2013/6/13	632
2013	2013/6/14	641
2013	2013/6/15	655
2013	2013/6/16	667
2013	2013/6/17	679
2013	2013/6/18	690
2013	2013/6/19	695
2013	2013/6/20	705
2013	2013/6/21	710
2013	2013/6/22	709
2013	2013/6/23	706
2013	2013/6/24	704
2013	2013/6/25	696
2013	2013/6/26	694
2013	2013/6/27	691
2013	2013/6/28	688
2013	2013/6/29	682
2013	2013/6/30	675
2013	2013/7/1	668
2013	2013/7/2	663
2013	2013/7/3	654
2013	2013/7/4	636
2013	2013/7/5	614
2013	2013/7/6	592
2013	2013/7/7	570
2013	2013/7/8	554
2013	2013/7/9	540
2013	2013/7/10	529
2013	2013/7/11	526
2013	2013/7/12	524
2013	2013/7/13	522
2013	2013/7/14	527
2013	2013/7/15	535
2013	2013/7/16	555
2013	2013/7/17	584
2013	2013/7/18	609
2013	2013/7/19	621
2013	2013/7/20	633
2013	2013/7/21	643
2013	2013/7/22	652
2013	2013/7/23	655
2013	2013/7/24	656
2013	2013/7/25	662
2013	2013/7/26	671
2013	2013/7/27	679
2013	2013/7/28	687
2013	2013/7/29	696
2013	2013/7/30	704
2013	2013/7/31	712
2012	2012/6/1	884
2012	2012/6/2	881
2012	2012/6/3	857
2012	2012/6/4	809
2012	2012/6/5	767
2012	2012/6/6	736
2012	2012/6/7	717
2012	2012/6/8	706
2012	2012/6/9	698
2012	2012/6/10	684
2012	2012/6/11	659
2012	2012/6/12	647
2012	2012/6/13	634
2012	2012/6/14	618
2012	2012/6/15	608
2012	2012/6/16	598
2012	2012/6/17	587
2012	2012/6/18	583
2012	2012/6/19	589
2012	2012/6/20	584
2012	2012/6/21	591
2012	2012/6/22	599
2012	2012/6/23	597
2012	2012/6/24	589
2012	2012/6/25	571
2012	2012/6/26	554
2012	2012/6/27	546
2012	2012/6/28	558
2012	2012/6/29	563
2012	2012/6/30	556
2012	2012/7/1	551
2012	2012/7/2	553
2012	2012/7/3	559
2012	2012/7/4	560
2012	2012/7/5	552
2012	2012/7/6	538
2012	2012/7/7	526
2012	2012/7/8	523
2012	2012/7/9	524
2012	2012/7/10	523
2012	2012/7/11	508
2012	2012/7/12	493
2012	2012/7/13	492
2012	2012/7/14	492
2012	2012/7/15	492
2012	2012/7/16	503
2012	2012/7/17	508
2012	2012/7/18	511
2012	2012/7/19	514
2012	2012/7/20	510
2012	2012/7/21	499
2012	2012/7/22	494
2012	2012/7/23	489
2012	2012/7/24	483
2012	2012/7/25	475
2012	2012/7/26	473
2012	2012/7/27	470
2012	2012/7/28	469
2012	2012/7/29	465
2012	2012/7/30	461
2012	2012/7/31	463
2011	2011/6/1	77
2011	2011/6/2	107
2011	2011/6/3	261
2011	2011/6/4	420
2011	2011/6/5	496
2011	2011/6/6	569
2011	2011/6/7	644
2011	2011/6/8	698
2011	2011/6/9	774
2011	2011/6/10	776
2011	2011/6/11	758
2011	2011/6/12	746
2011	2011/6/13	742
2011	2011/6/14	762
2011	2011/6/15	762
2011	2011/6/16	755
2011	2011/6/17	752
2011	2011/6/18	755
2011	2011/6/19	757
2011	2011/6/20	759
2011	2011/6/21	762
2011	2011/6/22	764
2011	2011/6/23	772
2011	2011/6/24	779
2011	2011/6/25	791
2011	2011/6/26	796
2011	2011/6/27	798
2011	2011/6/28	799
2011	2011/6/29	799
2011	2011/6/30	802
2011	2011/7/1	802
2011	2011/7/2	804
2011	2011/7/3	805
2011	2011/7/4	804
2011	2011/7/5	803
2011	2011/7/6	804
2011	2011/7/7	804
2011	2011/7/8	803
2011	2011/7/9	801
2011	2011/7/10	800
2011	2011/7/11	800
2011	2011/7/12	796
2011	2011/7/13	793
2011	2011/7/14	788
2011	2011/7/15	784
2011	2011/7/16	780
2011	2011/7/17	781
2011	2011/7/18	792
2011	2011/7/19	798
2011	2011/7/20	799
2011	2011/7/21	803
2011	2011/7/22	805
2011	2011/7/23	804
2011	2011/7/24	797
2011	2011/7/25	795
2011	2011/7/26	788
2011	2011/7/27	767
2011	2011/7/28	754
2011	2011/7/29	743
2011	2011/7/30	739
2011	2011/7/31	727
2010	2010/6/1	940
2010	2010/6/2	939
2010	2010/6/3	933
2010	2010/6/4	911
2010	2010/6/5	893
2010	2010/6/6	868
2010	2010/6/7	821
2010	2010/6/8	785
2010	2010/6/9	761
2010	2010/6/10	748
2010	2010/6/11	745
2010	2010/6/12	743
2010	2010/6/13	738
2010	2010/6/14	726
2010	2010/6/15	720
2010	2010/6/16	716
2010	2010/6/17	714
2010	2010/6/18	709
2010	2010/6/19	699
2010	2010/6/20	689
2010	2010/6/21	679
2010	2010/6/22	670
2010	2010/6/23	654
2010	2010/6/24	642
2010	2010/6/25	629
2010	2010/6/26	611
2010	2010/6/27	597
2010	2010/6/28	595
2010	2010/6/29	585
2010	2010/6/30	587
2010	2010/7/1	602
2010	2010/7/2	635
2010	2010/7/3	667
2010	2010/7/4	707
2010	2010/7/5	709
2010	2010/7/6	703
2010	2010/7/7	695
2010	2010/7/8	689
2010	2010/7/9	686
2010	2010/7/10	699
2010	2010/7/11	708
2010	2010/7/12	710
2010	2010/7/13	706
2010	2010/7/14	700
2010	2010/7/15	697
2010	2010/7/16	685
2010	2010/7/17	645
2010	2010/7/18	635
2010	2010/7/19	632
2010	2010/7/20	622
2010	2010/7/21	616
2010	2010/7/22	603
2010	2010/7/23	592
2010	2010/7/24	578
2010	2010/7/25	565
2010	2010/7/26	552
2010	2010/7/27	541
2010	2010/7/28	530
2010	2010/7/29	507
2010	2010/7/30	481
2010	2010/7/31	452
2015	2015/6/1	721
2015	2015/6/2	740
2015	2015/6/3	762.5
2015	2015/6/4	794.5
2015	2015/6/5	786.5
2015	2015/6/6	762
2015	2015/6/7	758
2015	2015/6/8	758
2015	2015/6/9	754
2015	2015/6/10	750
2015	2015/6/11	747
2015	2015/6/12	744
2015	2015/6/13	744
2015	2015/6/14	744
2015	2015/6/15	742
2015	2015/6/16	740
2015	2015/6/17	739
2015	2015/6/18	740
2015	2015/6/19	741
2015	2015/6/20	745
2015	2015/6/21	751
2015	2015/6/22	756
2015	2015/6/23	759
2015	2015/6/24	758
2015	2015/6/25	760
2015	2015/6/26	758
2015	2015/6/27	757
2015	2015/6/28	755
2015	2015/6/29	754
2015	2015/6/30	753
2015	2016/7/1	740
2015	2016/7/2	735
2015	2016/7/3	721
2015	2016/7/4	757
2015	2016/7/5	708
2015	2016/7/6	703
2015	2016/7/7	697
2015	2016/7/8	690
2015	2016/7/9	680
2015	2016/7/10	677
2015	2016/7/11	661
2015	2016/7/12	650
2015	2016/7/13	636
2015	2016/7/14	617
2015	2016/7/15	596
2015	2016/7/16	586
2015	2016/7/17	580
2015	2016/7/18	592
2015	2016/7/19	601
2015	2016/7/20	625
2015	2016/7/21	627
2015	2016/7/22	650
2015	2016/7/23	651
2015	2016/7/24	650
2015	2016/7/25	652
2015	2016/7/26	654
2015	2016/7/27	658
2015	2016/7/28	663
2015	2016/7/29	677
2015	2016/7/30	685
2015	2016/7/31	695
2016	2016/7/3	726
2016	2016/7/4	731
2016	2016/7/5	733
2016	2016/7/6	734
2016	2016/7/8	731
2016	2016/7/9	729
2016	2016/7/10	728
2016	2016/7/11	724
2016	2016/7/12	723
2016	2016/7/13	722
2016	2016/7/15	716
2016	2016/7/16	718
2016	2016/7/19	716
2016	2016/7/20	721
2016	2016/7/22	725
2016	2016/7/23	728
2016	2016/7/25	730
2016	2016/7/26	729
