# Supplementary material for: Effect of floods on the δ13C values in plant leaves: a study of willows in Northeastern Siberia
Source: PeerJ. 2018 Sep 20;6:e5374. doi: 10.7717/peerj.5374 (PMC6151259; doi:10.7717/peerj.5374)
Supplement: Supplemental Information 10 — Raw data for Figure A3. [file peerj-06-5374-s010.csv]

Sample name	Points	Sample name	d13C	Order (bottom to top)
SBoydom-PA-¢Û	SBoydom-PA	Sboydom-PA-¢Û-(2)-1	-27.4645	4th
SBoydom-PA-¢Û	SBoydom-PA	Sboydom-PA-¢Û-(2)-2	-27.3385	3rd
SBoydom-PA-¢Û	SBoydom-PA	Sboydom-PA-¢Û-(2)-3	-27.4985	2nd
SBoydom-PA-¢Û	SBoydom-PA	Sboydom-PA-¢Û-(2)-4	-27.7985	1st
SKA-PC-¢Û	SKA-PC	SKA-PC-¢Û-(2)-1	-27.6665	4th
SKA-PC-¢Û	SKA-PC	SKA-PC-¢Û-(2)-2	-27.2735	3rd
SKA-PC-¢Û	SKA-PC	SKA-PC-¢Û-(2)-3	-27.1245	2nd
SKA-PC-¢Û	SKA-PC	SKA-PC-¢Û-(2)-4	-27.0565	1st
SBoydom-PC-¢Ú	SBoydom-PC	Sboydom-PC-¢Ú-(2)-1	-28.6865	4th
SBoydom-PC-¢Ú	SBoydom-PC	Sboydom-PC-¢Ú-(2)-2	-28.3985	3rd
SBoydom-PC-¢Ú	SBoydom-PC	Sboydom-PC-¢Ú-(2)-3	-28.7895	2nd
SBoydom-PC-¢Ú	SBoydom-PC	Sboydom-PC-¢Ú-(2)-4	-28.2085	1st
SKA-PA-¢Ü	SKA-PA	SKA-PA-¢Ü-(2)-1	-30.7325	4th
SKA-PA-¢Ü	SKA-PA	SKA-PA-¢Ü-(2)-2	-30.6055	3rd
SKA-PA-¢Ü	SKA-PA	SKA-PA-¢Ü-(2)-3	-30.2415	2nd
SKA-PA-¢Ü	SKA-PA	SKA-PA-¢Ü-(2)-4	-30.2025	1st
